# Supplementary material
Source: MDPI journal article supplement (https://www.mdpi.com/2071-1050/15/15/11965)
Supplement: s1 [file s1]

**Table S1.** Historical Data of flooding sites used for validation (According to General Directorate of Civil Defense (personal communication, 21 Jan 2019))

| Year of flood          | Flooded area | Flood hazard class   |
|------------------------|--------------|----------------------|
| 1963, 1966, 1991, 2018 | Maan         | Low, Medium and High |
| 1966, 2007, 2018       | Madaba       | Medium and High      |
| 1987                   | Azzrqa       | Medium and High      |
| 1991                   | Tafielh      | Low, Medium and High |
| 1991                   | Karak        | Medium and High      |
| 1994                   | Irbid        | Medium and High      |
| 2015                   | Amman        | Medium and High      |
| 2018                   | DS/ Balka    | Medium and High      |

**Table S2.** Soil type

| Soil type | Texture                                             | Minimum rate of infiltration, and cover types |
|-----------|-----------------------------------------------------|-----------------------------------------------|
| A         | Deep sands, deep loess, and silt                    | Highly infiltration rates                     |
| B         | Shallow loess and sandy loam                        | Moderately porous soil                        |
| C         | Clay loam, shallow sandy loam, soils of low organic | Moderately impervious soil                    |
| D         | Clay and salty soils                                | High streamflow potential                     |

**Table S3.** Soil group disruption and calculated curve number (CN)

| Assigned CN | 92.00      | 91.00 | 77.00 |                 |
|-------------|------------|-------|-------|-----------------|
| Basin no    | Soil Group |       |       | Calculated (CN) |
|             | D          | C/D   | A     |                 |
| 1           | 90%        | 3%    | 7%    | 90.92           |
| 2           | 80%        | 18%   | 2%    | 91.52           |
| 3           | 80%        | 18%   | 2%    | 91.52           |
| 4           | 90%        | 8%    | 2%    | 91.62           |
| 5           | 50%        | 45%   | 5%    | 90.80           |
| 6           |            | 98%   | 2%    | 90.72           |
| 7           | 85%        | 13%   | 2%    | 91.57           |
| 8           | 85%        | 12%   | 3%    | 91.43           |
| 9           | 85%        | 12%   | 3%    | 91.43           |
| 10          | 80%        | 17%   | 3%    | 91.38           |
| 11          | 85%        | 12%   | 3%    | 91.43           |
| 12          | 90%        | 7%    | 3%    | 91.48           |
| 13          | 92%        | 5%    | 3%    | 91.50           |
| 14          | 92%        | 5%    | 3%    | 91.50           |
| 15          | 92%        | 5%    | 3%    | 91.50           |
| Average     | 80%        | 17%   | 3%    | -               |

**Table S4.** Specifications of Tipping Bucket rain gauge

| Property            | Description/Value                                                                                                |
|---------------------|------------------------------------------------------------------------------------------------------------------|
| Receiver            | 200 mm (8 inch) or 282.8 mm (11.1 inch) diameter with machined aluminum rim                                      |
| Sensitivity         | One tip at 0.2, 0.5, 1.0 mm or 0.01 inch                                                                         |
| Measurements        | Range: 0-700 mm/hour<br>Accuracy: $\pm 2\%$ 25-500 mm/hour, $\pm 1$ tip from 1-25 mm/hour                        |
| Sensor              | Tipping bucket with siphon                                                                                       |
| Siphon              | 0.4mm capacity of rainfall - made from brass with a non-hygroscopic outer body                                   |
| Contacts            | Type: dual reed-switch (make contact), momentary<br>Rating:12 VA (0.5 amp max)<br>Duration: 0.1 second           |
| Physical dimensions | Height x diameter: 342 mm (13.5") x 229 mm 9"<br>Weight: 3 kg (6.6 lbs)                                          |
| Bucket              | Chrome plated, injected molded non-hygroscopic ABS balanced $\pm 0.05$ gms                                       |
| Base                | Die-cast aluminum                                                                                                |
| Mounting holes      | Three (3) 10mm diameter mounting holes                                                                           |
| Drain fittings      | Able to attach 12 mm inside diameter tubing, to catch rainfall after passing through buckets                     |
| Pivots              | Ground sapphire pivots with stainless steel shaft                                                                |
| Insect covers       | Stainless steel mesh on all openings to prevent insects from entering the gauge                                  |
| Outer enclosure     | Keyed to enable the release of the outer enclosure without the need for the removal of the three securing screws |

**Table S5.** Proportional Systematic Error and Constant Systematic Error (Slope (M) & Intercept(C))

| Stations | VALUES | ERA   | MER   | VALUES | ERA  | MER  | VALUES | ERA   | MER   |
|----------|--------|-------|-------|--------|------|------|--------|-------|-------|
| 1        | m      | 0.21  | 0.56  | m1     | 0.52 | 0.49 | m2     | 1.30  | 2.17  |
|          | c      | 0.33  | 1.04  | c1     | 0.85 | 0.91 | c2     | -1.63 | -1.85 |
|          | m      | 0.20  | 0.53  | m1     | 0.50 | 0.46 | m2     | 1.41  | 2.35  |
| 2        | c      | 0.35  | 1.11  | c1     | 0.89 | 0.96 | c2     | -1.78 | -2.10 |
|          | m      | 0.18  | 0.11  | m1     | 0.08 | 0.06 | m2     | 14.03 | 17.88 |
|          | c      | 0.60  | 0.52  | c1     | 0.26 | 0.27 | c2     | -3.34 | -4.54 |
| 3        | m      | 0.23  | 0.23  | m1     | 0.35 | 0.38 | m2     | 2.54  | 2.25  |
|          | c      | 0.34  | 0.30  | c1     | 0.51 | 0.49 | c2     | -1.47 | -1.28 |
|          | m      | 0.28  | 0.26  | m1     | 0.46 | 0.46 | m2     | 1.75  | 1.76  |
| 4        | c      | 0.57  | 0.55  | c1     | 0.97 | 0.98 | c2     | -2.09 | -2.16 |
|          | m      | 0.19  | 0.22  | m1     | 0.39 | 0.51 | m2     | 2.07  | 1.39  |
|          | c      | 0.59  | 0.42  | c1     | 1.20 | 0.96 | c2     | -3.11 | -1.87 |
| 5        | m      | 0.26  | 0.24  | m1     | 0.32 | 0.33 | m2     | 2.93  | 2.79  |
|          | c      | 0.45  | 0.40  | c1     | 0.55 | 0.54 | c2     | -1.72 | -1.66 |
|          | m      | 0.29  | 0.38  | m1     | 0.14 | 0.41 | m2     | 1.17  | 1.86  |
| 6        | c      | 0.49  | 0.43  | c1     | 0.23 | 0.46 | c2     | -1.62 | -2.15 |
|          | m      | 0.13  | 0.29  | m1     | 0.38 | 0.19 | m2     | 1.97  | 5.97  |
|          | c      | 0.13  | 0.81  | c1     | 0.39 | 0.51 | c2     | -1.03 | -2.76 |
| 7        | m      | 0.18  | 0.28  | m1     | 0.34 | 0.22 | m2     | 2.52  | 4.93  |
|          | c      | 0.26  | 0.74  | c1     | 0.48 | 0.57 | c2     | -1.44 | -2.65 |
|          | m      | 0.19  | 0.62  | m1     | 0.47 | 0.55 | m2     | 1.54  | 1.97  |
| 8        | c      | 0.46  | 1.08  | c1     | 1.12 | 0.96 | c2     | -2.38 | -1.75 |
|          | m      | 3.92  | 5.12  | m1     | 0.21 | 0.20 | m2     | 1.30  | 2.17  |
|          | c      | -2.79 | -3.09 | c1     | 0.60 | 0.61 | c2     | -1.63 | -1.85 |

|    |   |      |      |    |      |      |    |       |       |
|----|---|------|------|----|------|------|----|-------|-------|
| 13 | m | 0.20 | 0.28 | m1 | 0.39 | 0.22 | m2 | 2.04  | 4.74  |
|    | c | 0.28 | 0.89 | c1 | 0.56 | 0.71 | c2 | -1.41 | -3.20 |
| 14 | m | 0.20 | 0.35 | m1 | 0.14 | 0.06 | m2 | 7.46  | 21.24 |
|    | c | 0.21 | 0.94 | c1 | 0.15 | 0.16 | c2 | -1.04 | -2.66 |

**Table S6.** Correction quality of s ERA and MER dataset (calculated R2)

| Stations | MCP  |      | LA-developed |      |
|----------|------|------|--------------|------|
|          | ERA  | MER  | ERA          | MER  |
| 1        | 0.30 | 0.24 | 0.82         | 0.54 |
| 2        | 0.25 | 0.19 | 0.81         | 0.50 |
| 3        | 0.02 | 0.01 | 0.44         | 0.45 |
| 4        | 0.21 | 0.20 | 0.79         | 0.77 |
| 5        | 0.29 | 0.24 | 0.78         | 0.76 |
| 6        | 0.24 | 0.34 | 0.85         | 0.84 |
| 7        | 0.18 | 0.16 | 0.74         | 0.73 |
| 8        | 0.13 | 0.15 | 0.88         | 0.53 |
| 9        | 0.17 | 0.04 | 0.87         | 0.37 |
| 10       | 0.16 | 0.05 | 0.80         | 0.44 |
| 11       | 0.33 | 0.30 | 0.88         | 0.56 |
| 12       | 0.06 | 0.05 | 0.94         | 0.56 |
| 13       | 0.21 | 0.07 | 0.82         | 0.51 |
| 14       | 0.05 | 0.01 | 0.61         | 0.10 |

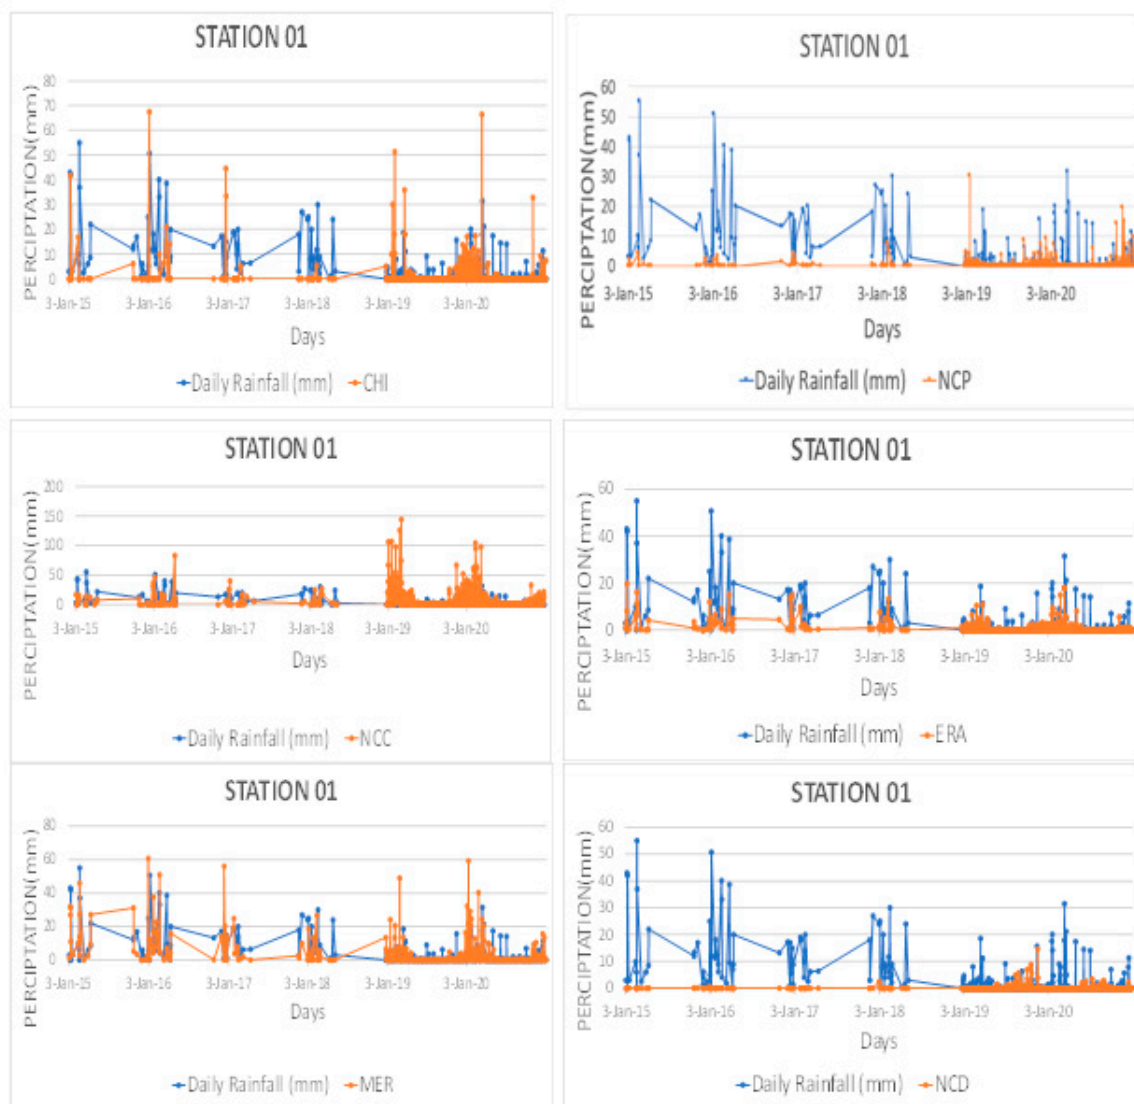

**Figure S1.** Multi-precipitation products with gauge-observed data at station 01



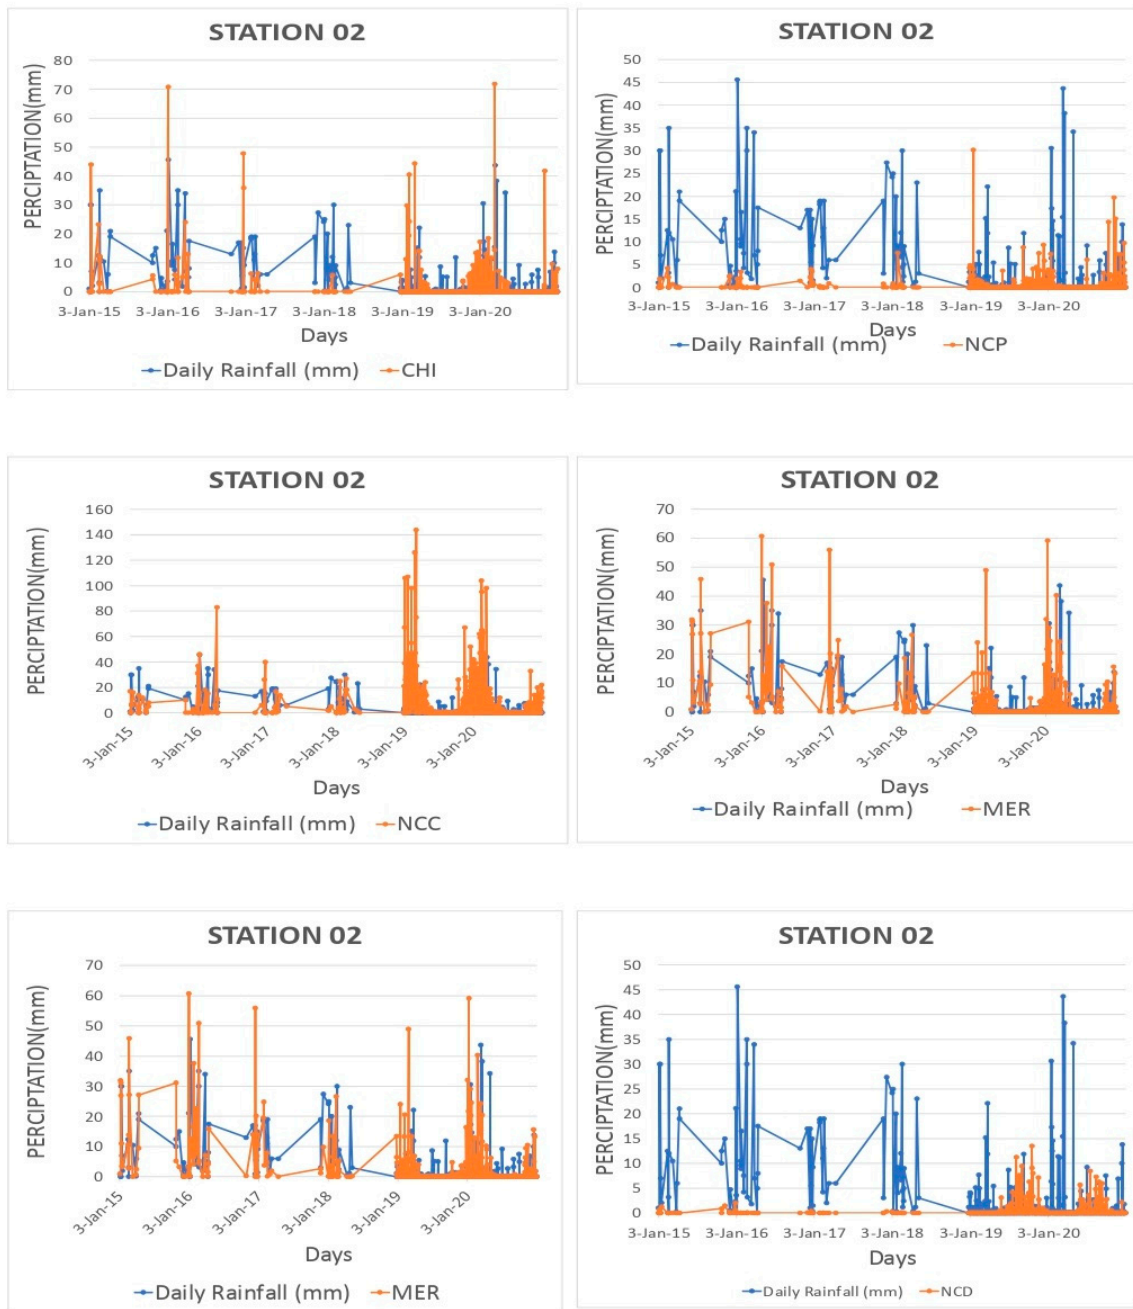

**Figure S2.** Multi-precipitation products with gauge-observed data at station 02

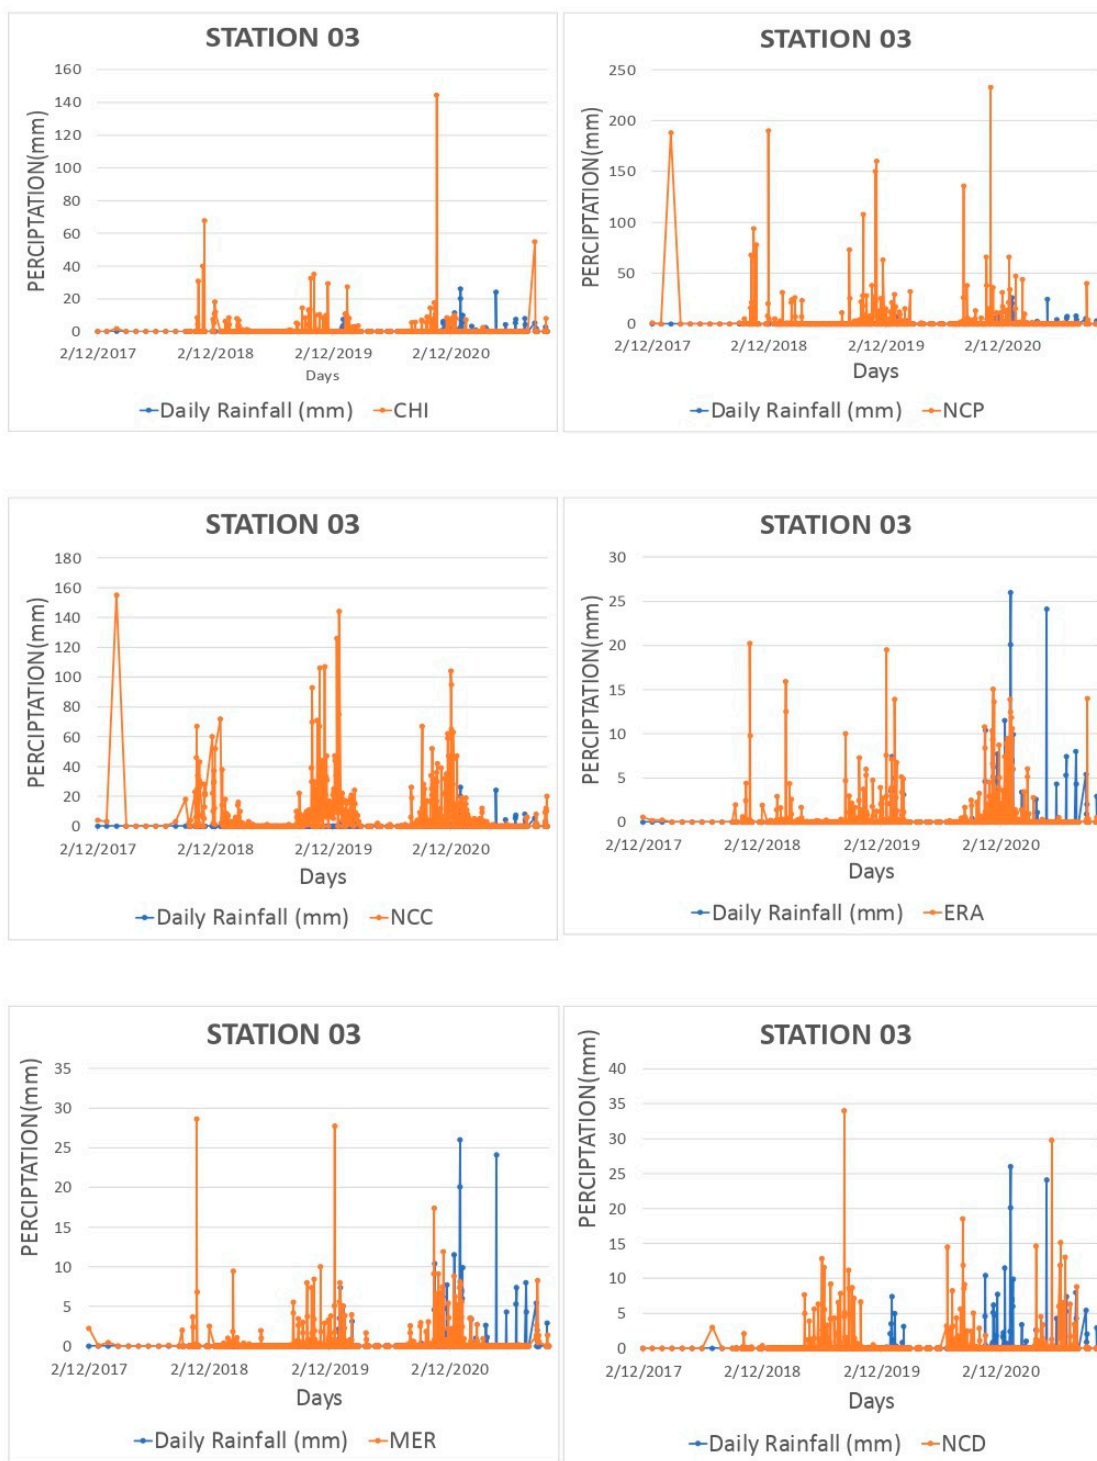

**Figure S3.** Multi-precipitation products with gauge-observed data at station 03.

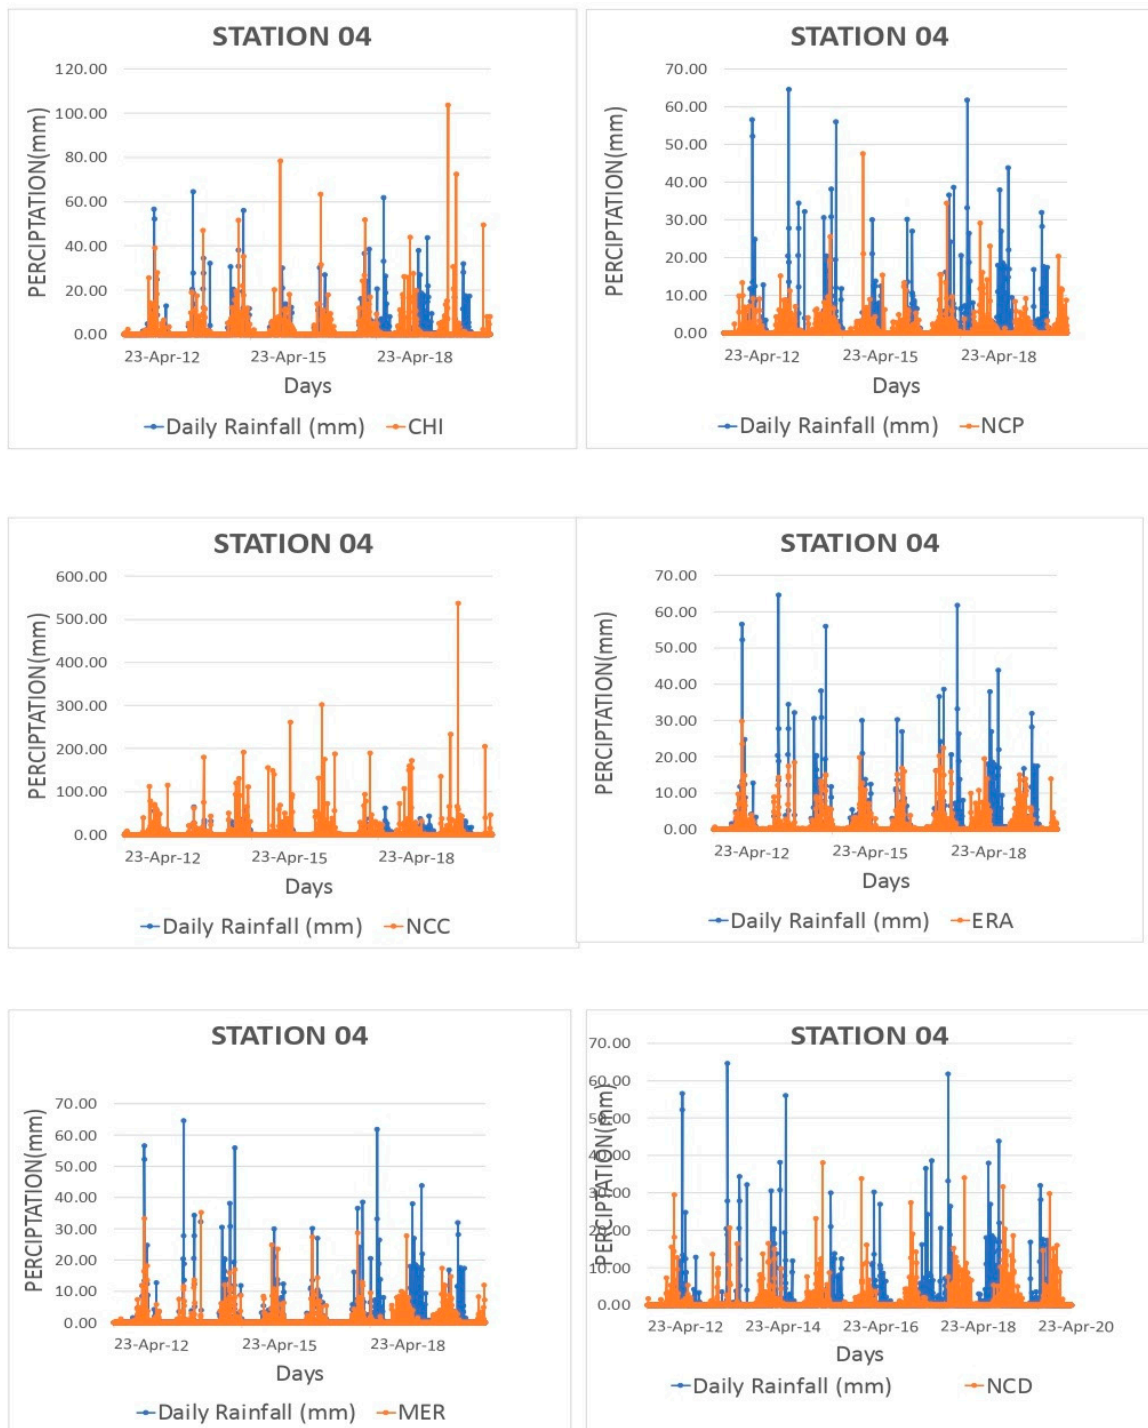

**Figure S4.** Multi-precipitation products with gauge-observed data at station 04.

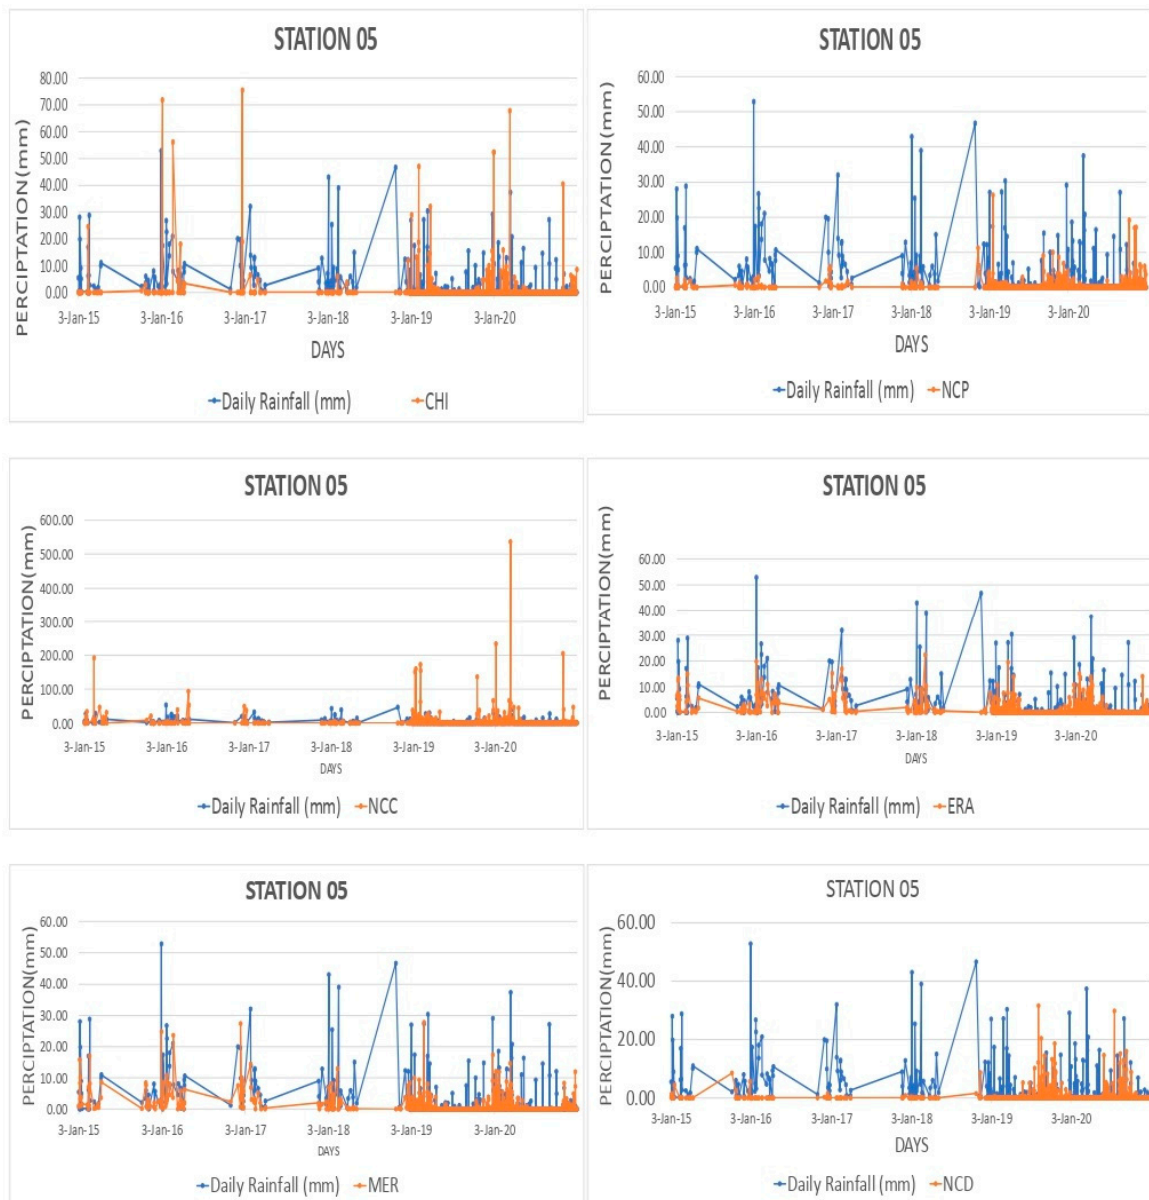

**Figure S5.** Multi-precipitation products with gauge-observed data at station 05.

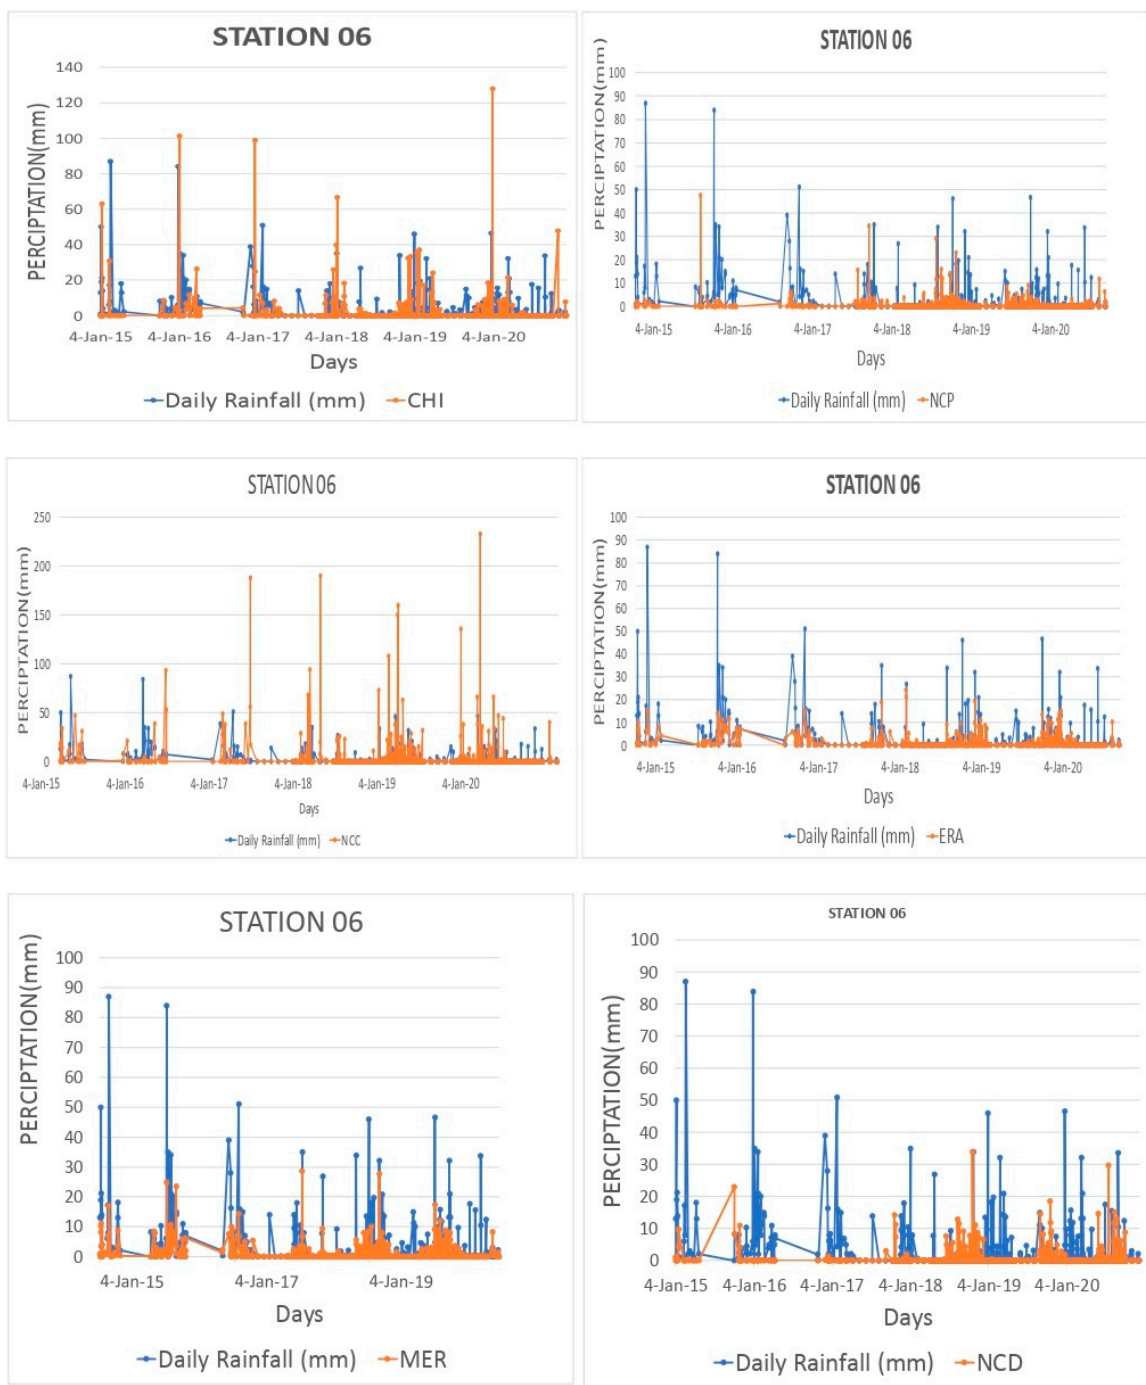

**Figure S6.** Multi-precipitation products with gauge-observed data at station 06.



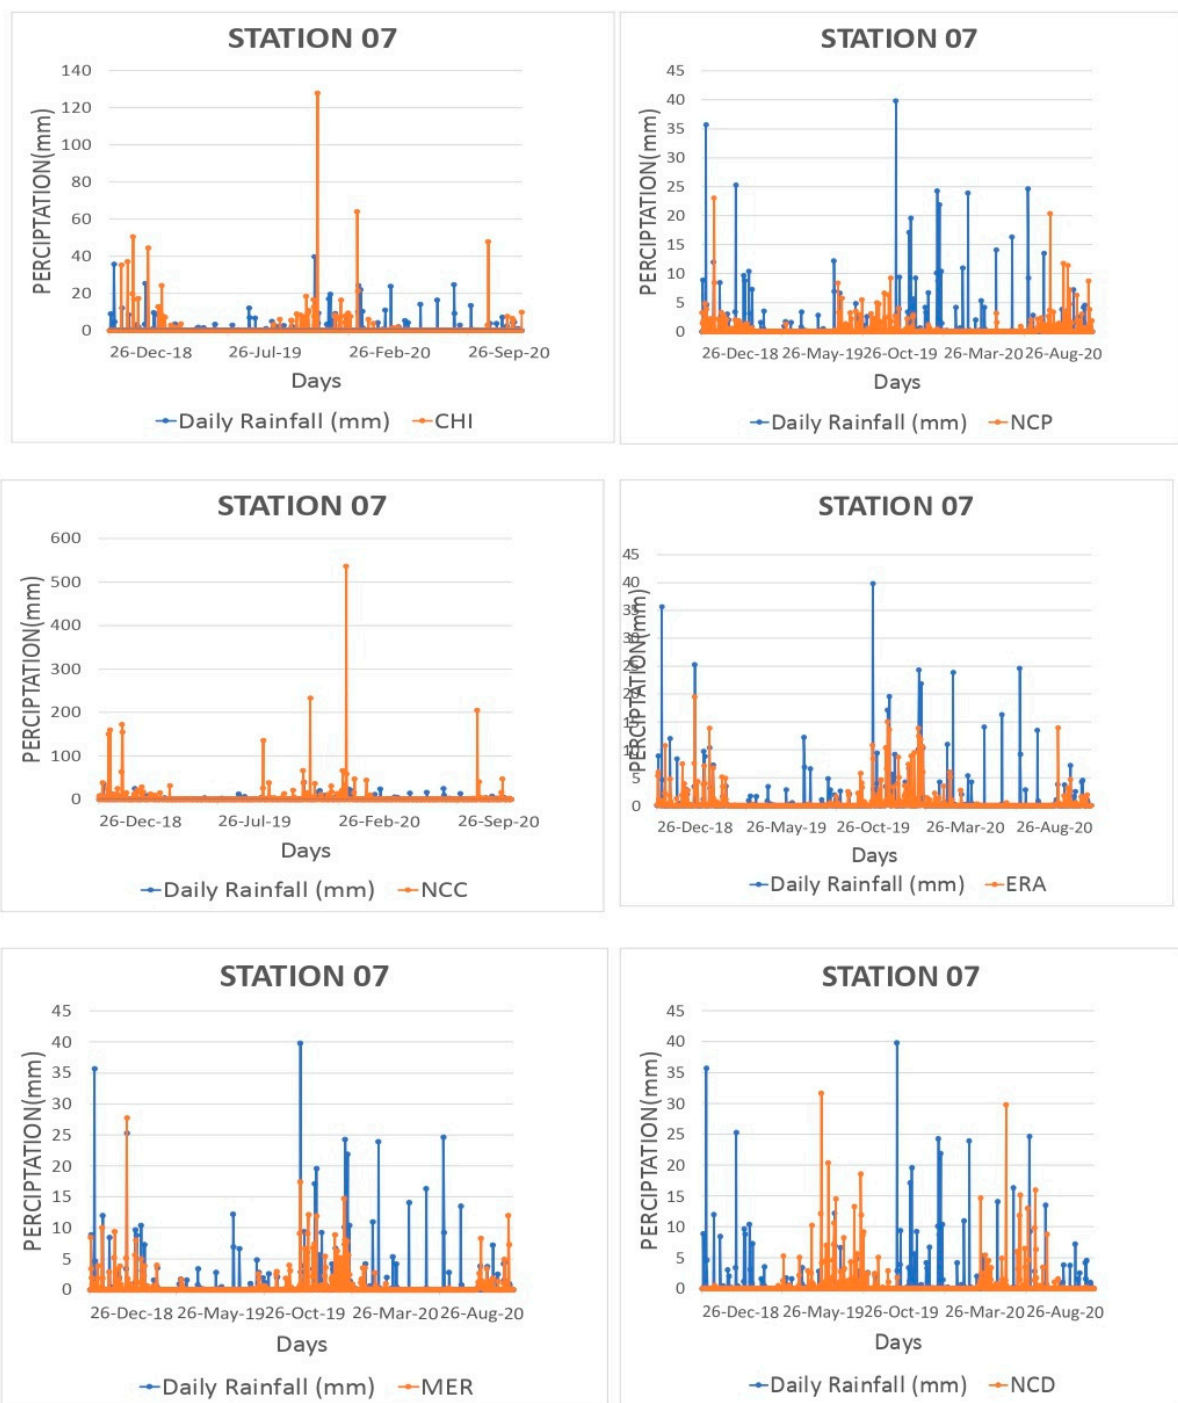

**Figure S7.** Multi-precipitation products with gauge-observed data at station 07.

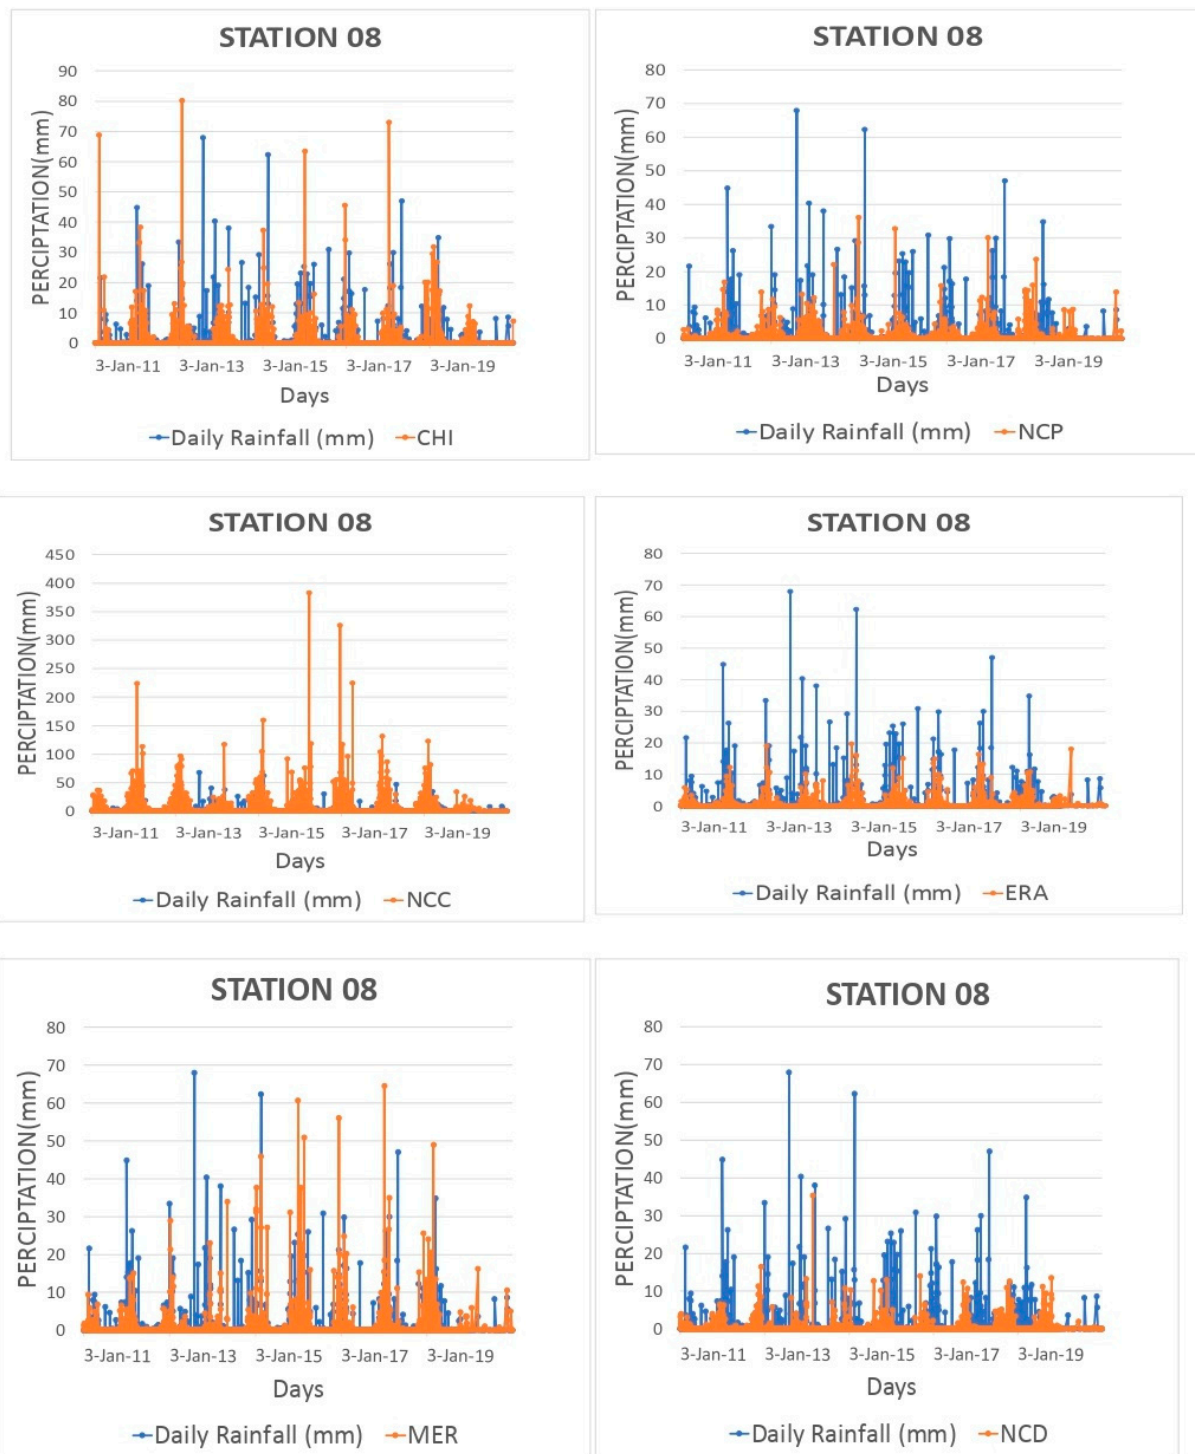

**Figure S8.** Multi-precipitation products with gauge-observed data at station 09.

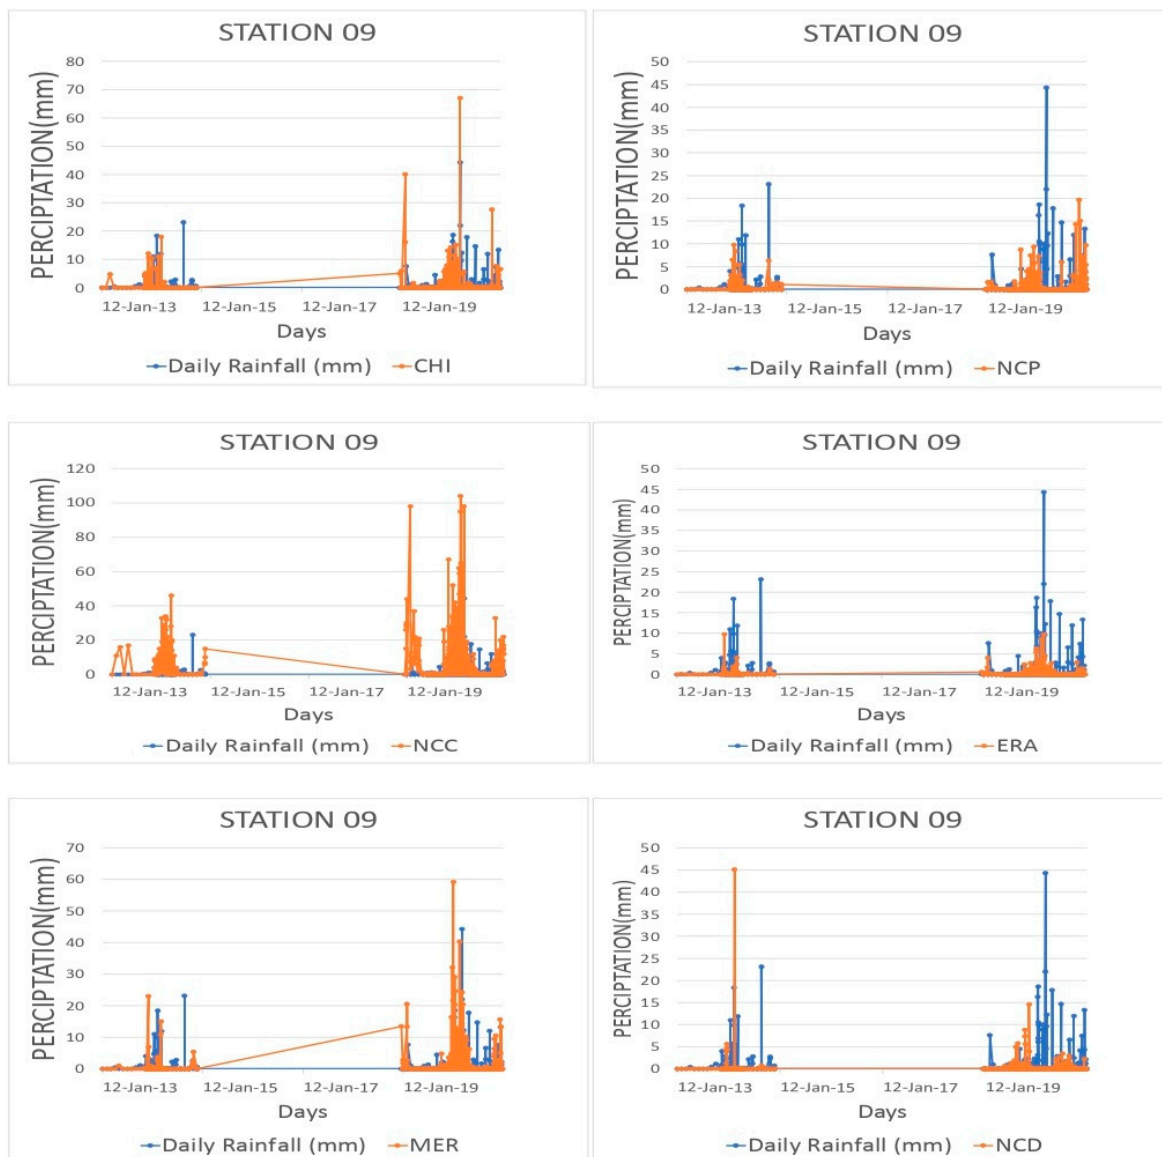

**Figure S9.** Multi-precipitation products with gauge-observed data at station 09.



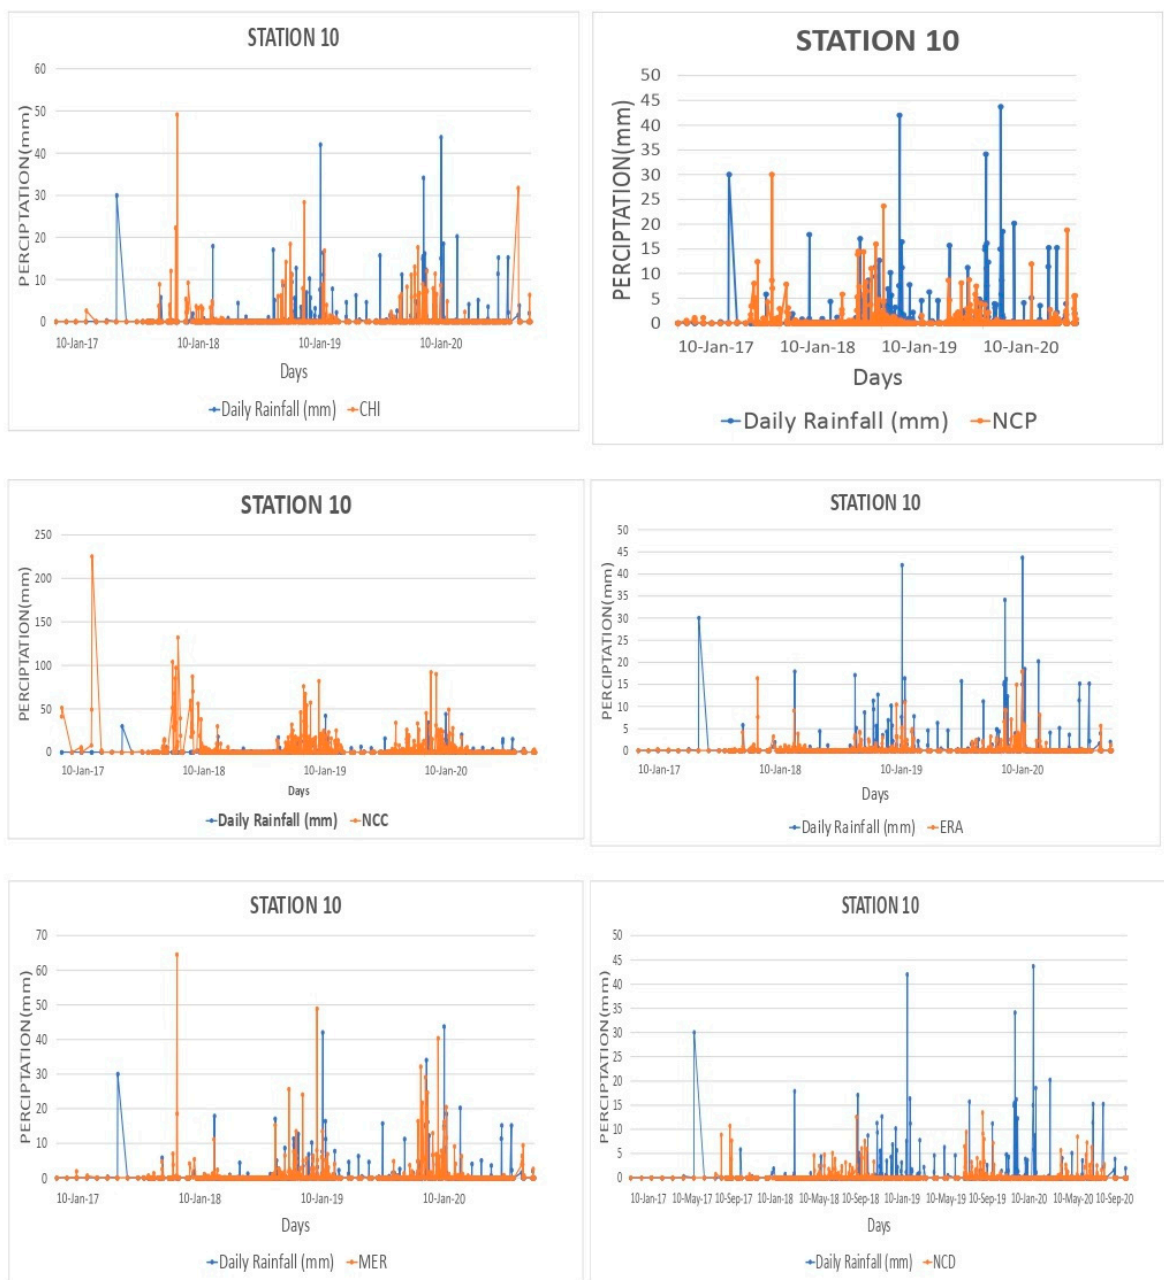

**Figure S10.** Multi-precipitation products with gauge-observed data at station 10.

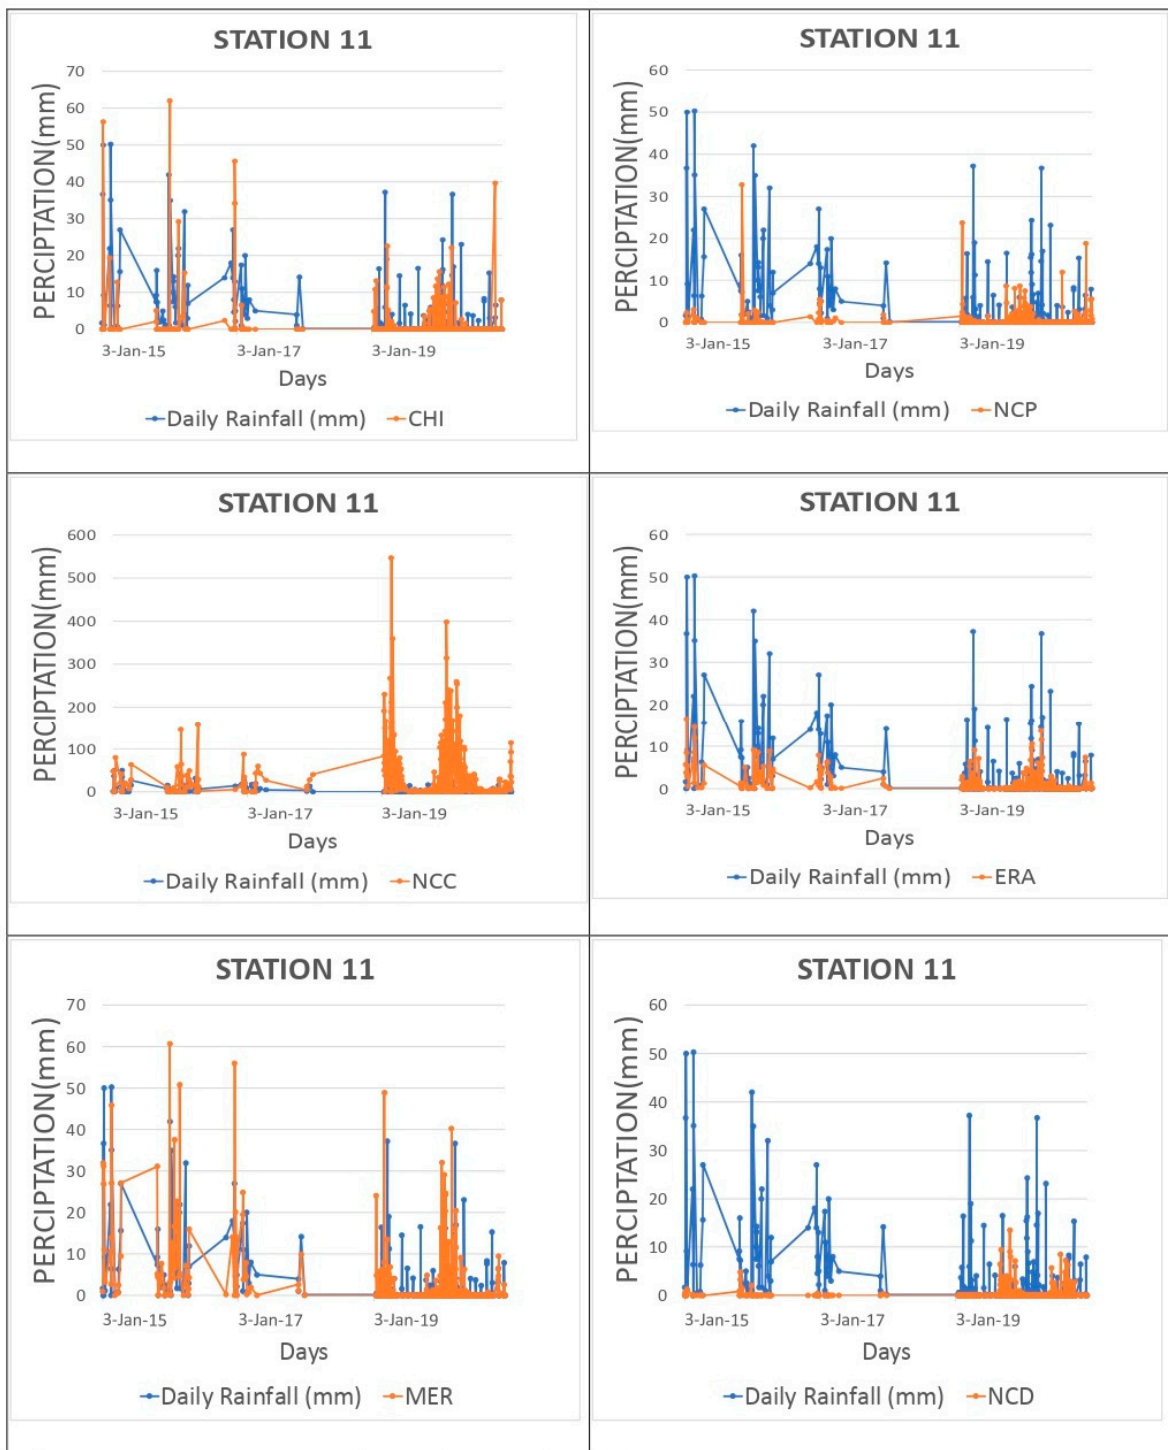

**Figure S11.** Multi-precipitation products with gauge-observed data at station 11.

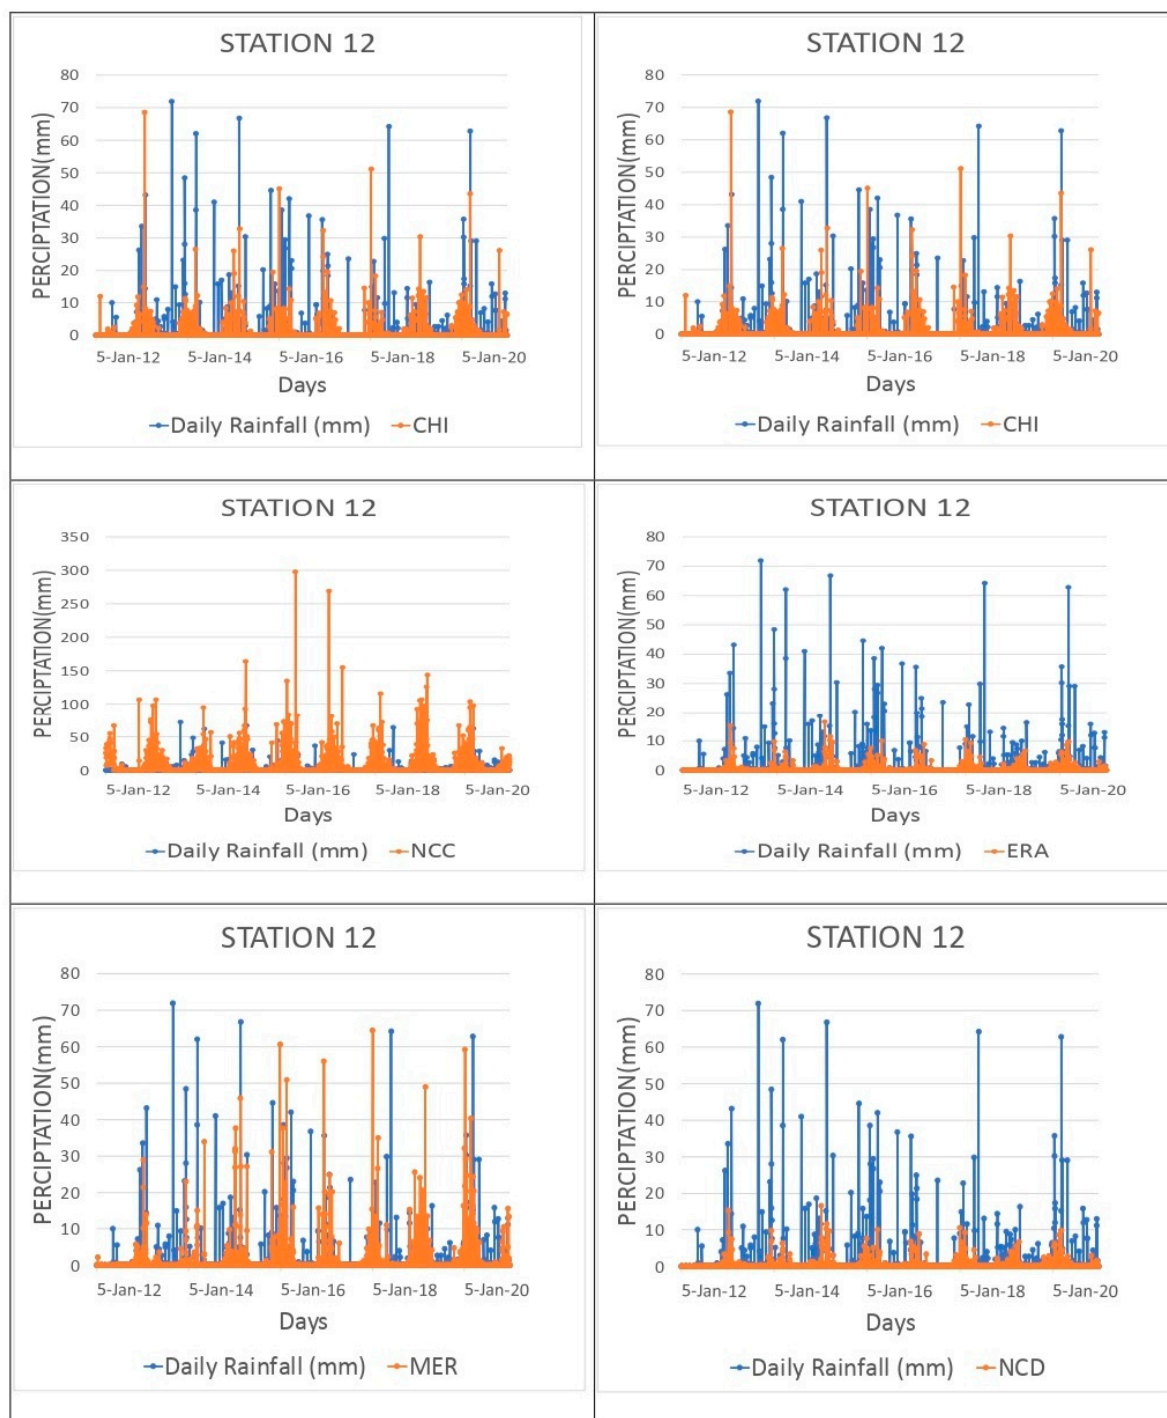

**Figure S12.** Multi-precipitation products with gauge-observed data at station 12.

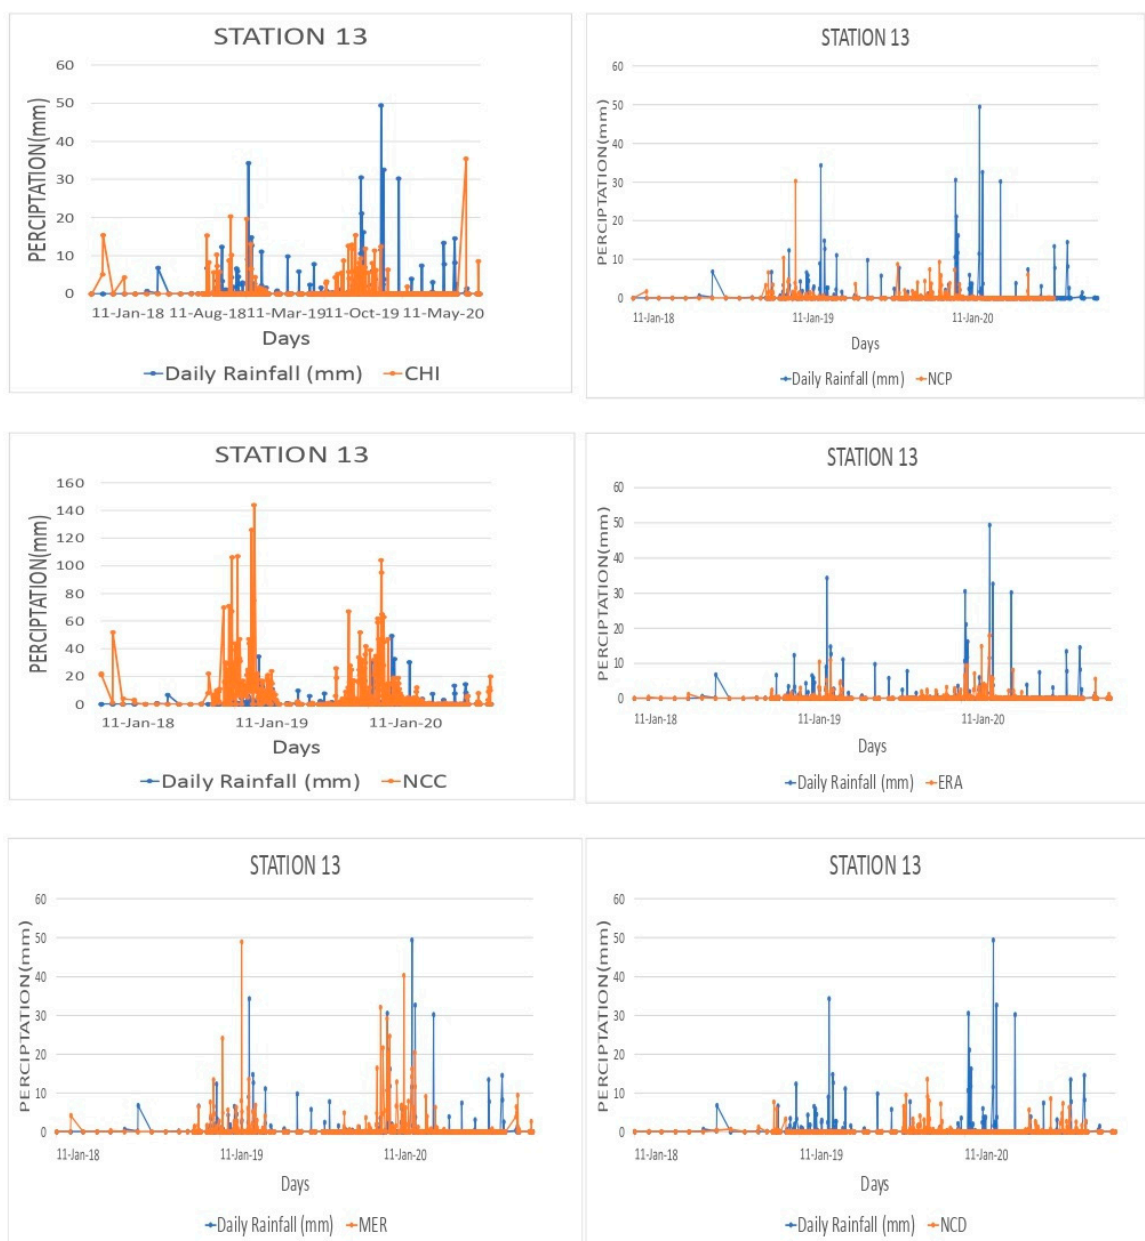

**Figure S13.** Multi-precipitation products with gauge-observed data at station 13.

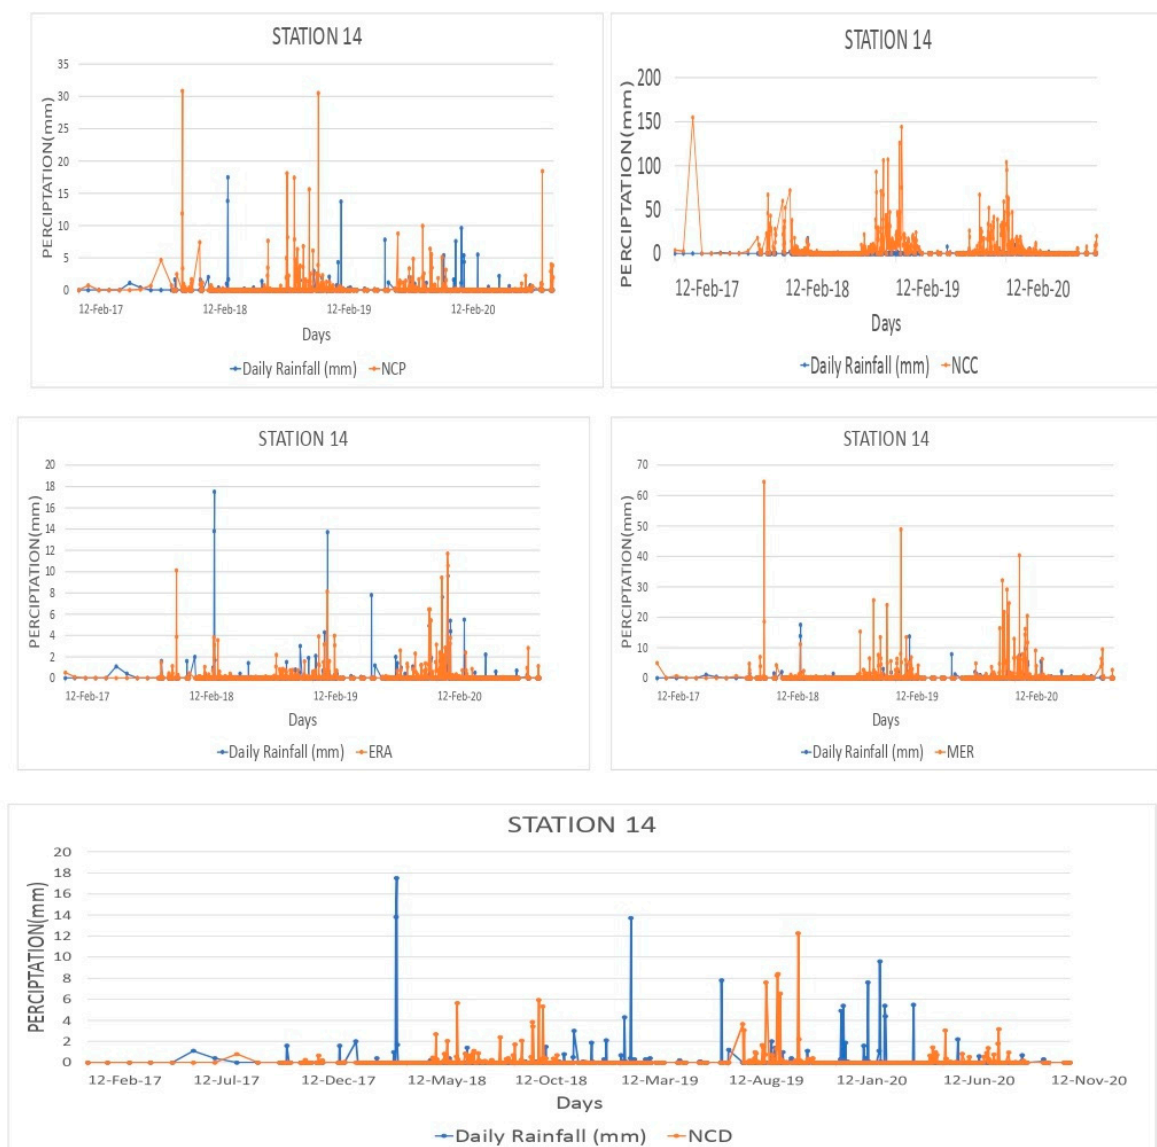

**Figure S3.** Multi-precipitation products with gauge-observed data at station 14

Station 13

ACTUAL VS REANALYSIS DATASET

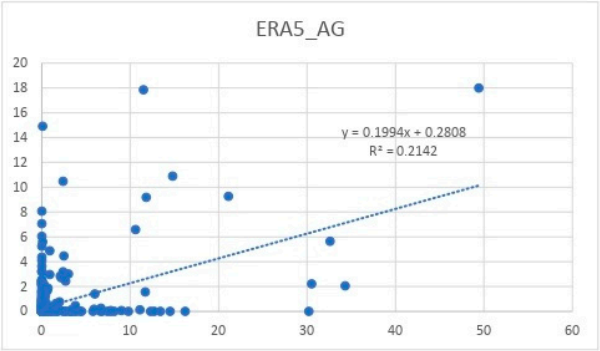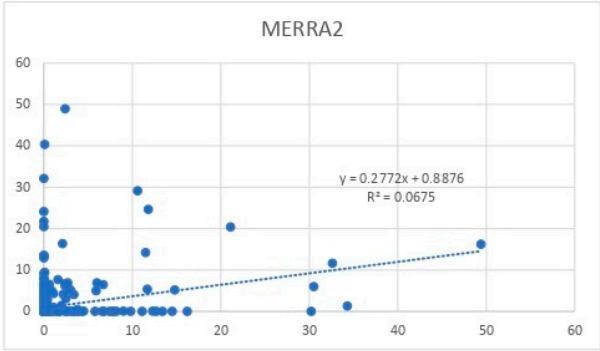

ACTUAL VS MCP

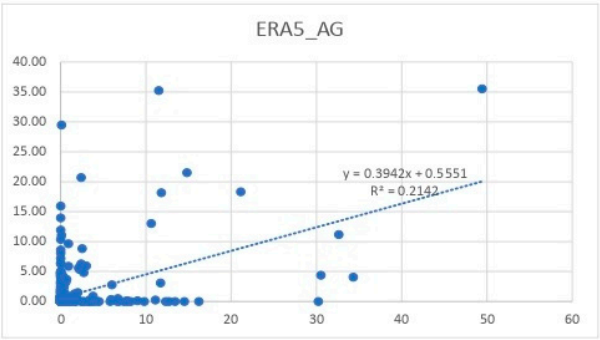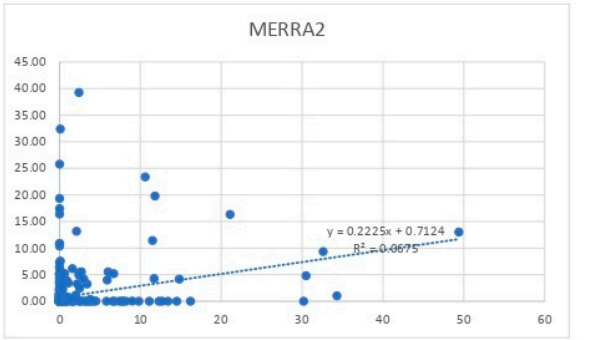

NEW ESTIMATED R DATA (GHIEN) AND ESTIMATED R (Re)

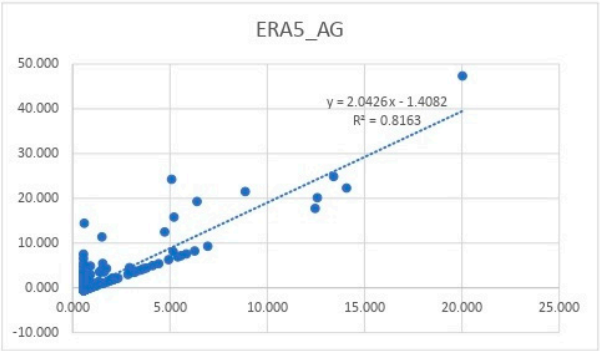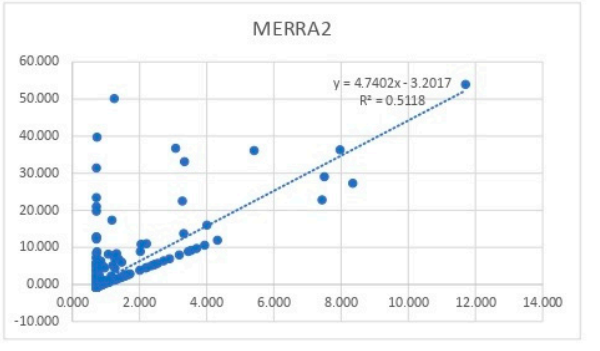



## Station 12

### ACTUAL VS REANALYSIS DATASET

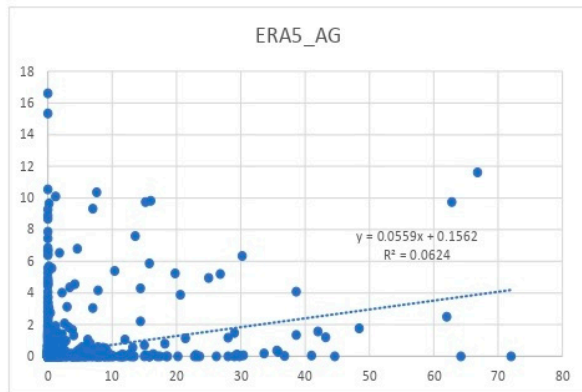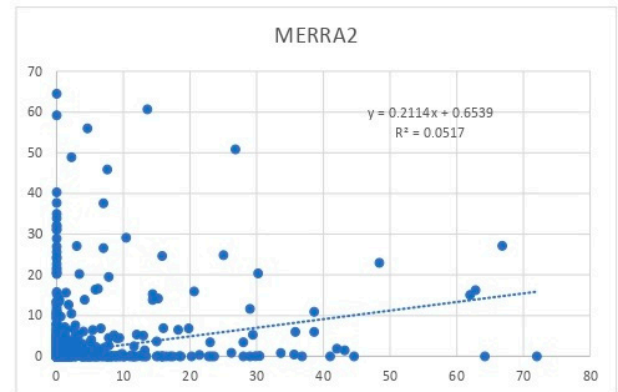

### ACTUAL VS MCP

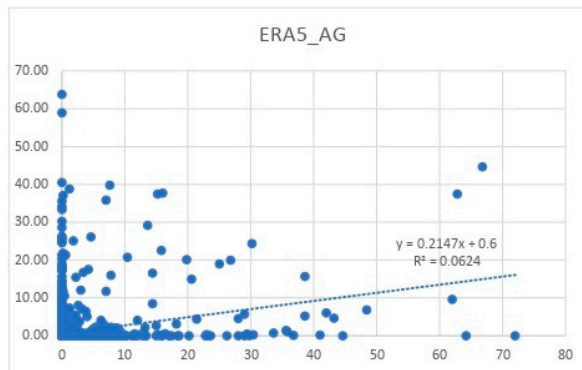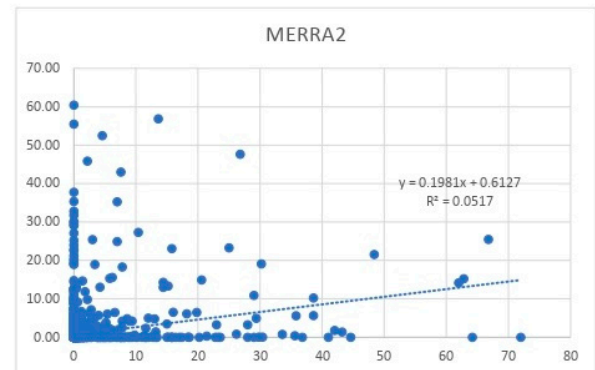

### NEW ESTIMATED R DATA (GHIE) AND ESTIMATED R (Re)

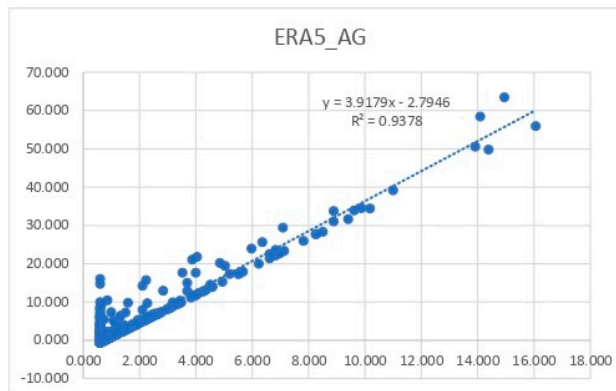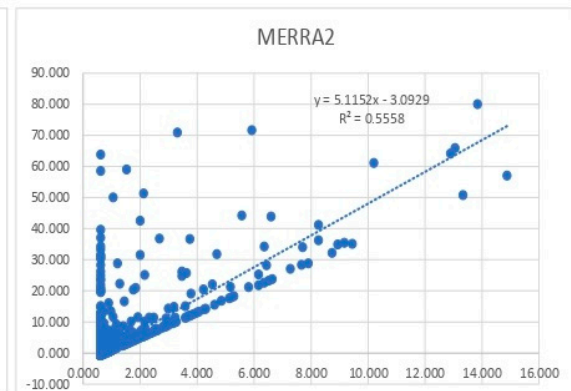

## Station 11

### ACTUAL VS REANALYSIS DATASET

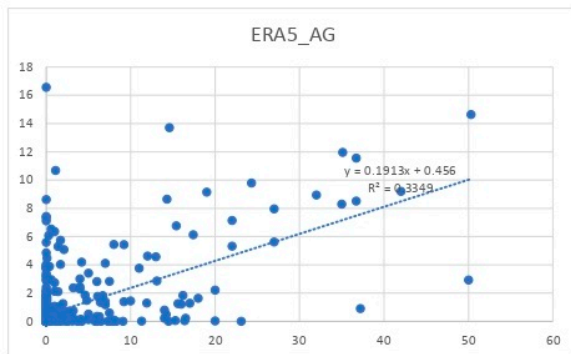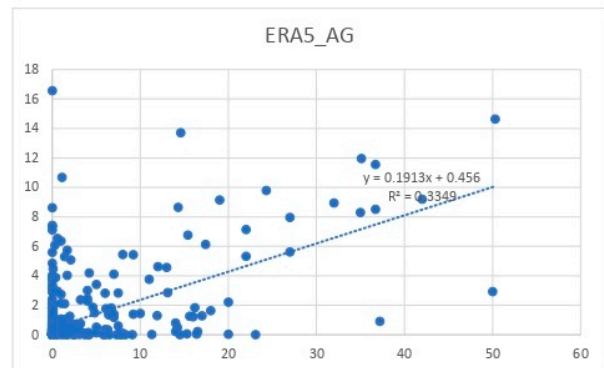

### ACTUAL VS MCP

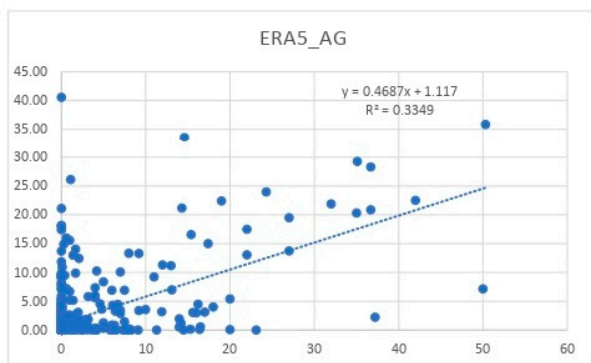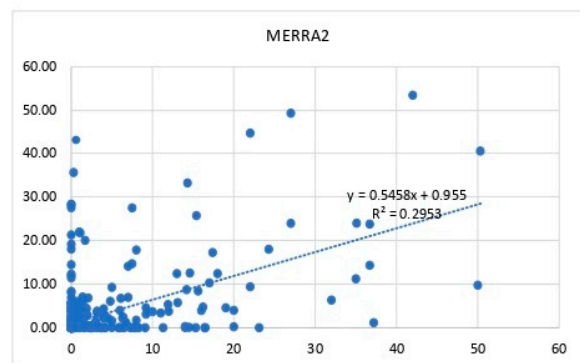

### NEW ESTIMATED R DATA (GHEN) AND ESTIMATED R (Re)

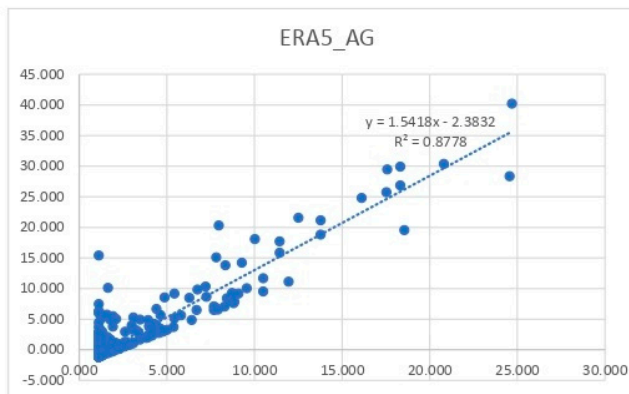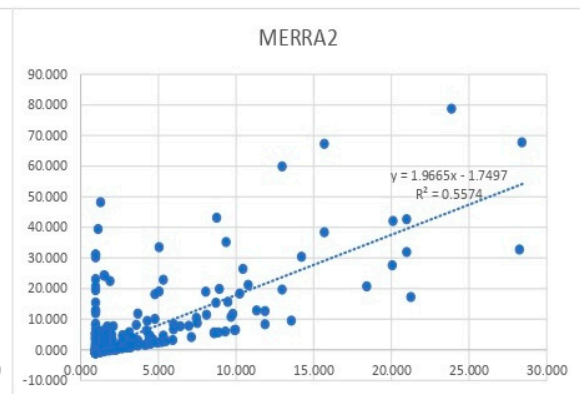



Station 10

ACTUAL VS REANALYSIS DATASET

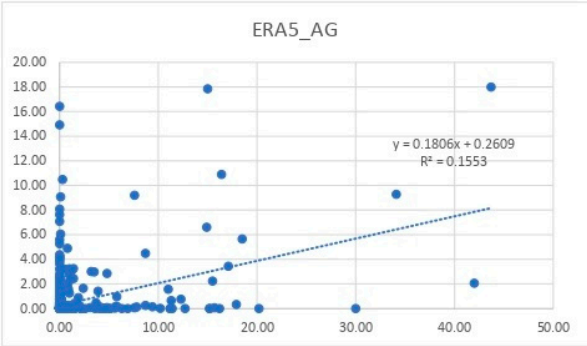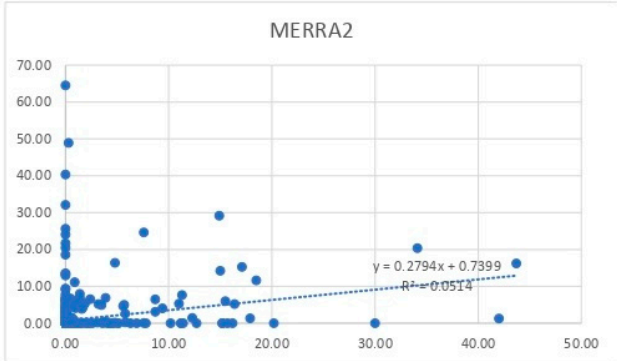

ACTUAL VS MCP

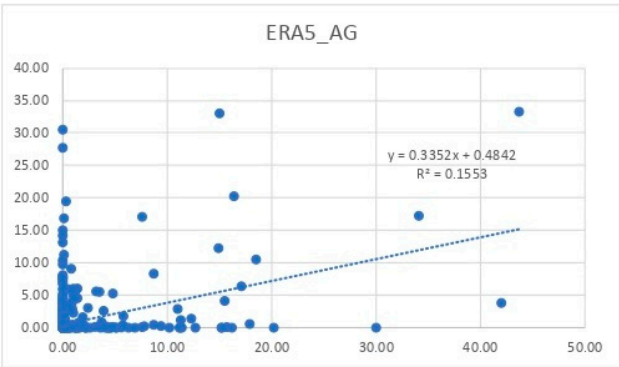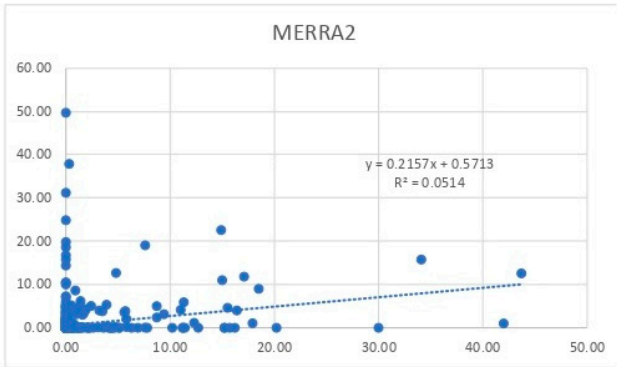

NEW ESTIMATED R DATA (GHIEN) AND ESTIMATED R (Re)

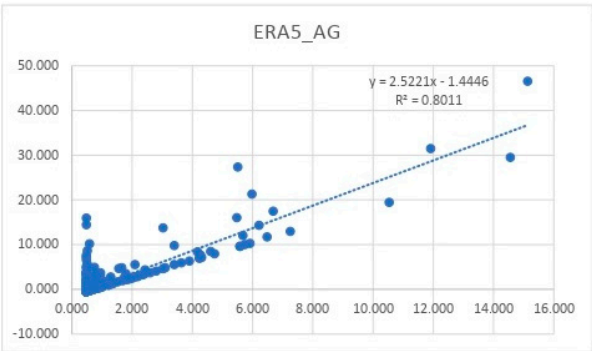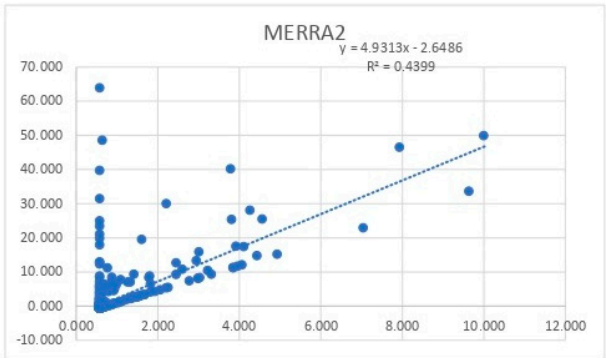

## Station 09

### ACTUAL VS REANALYSIS DATASET

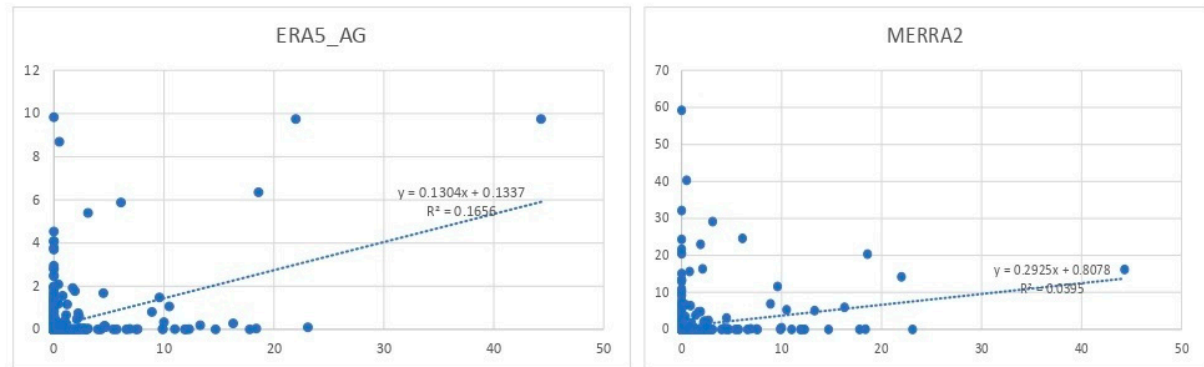

### ACTUAL VS MCP

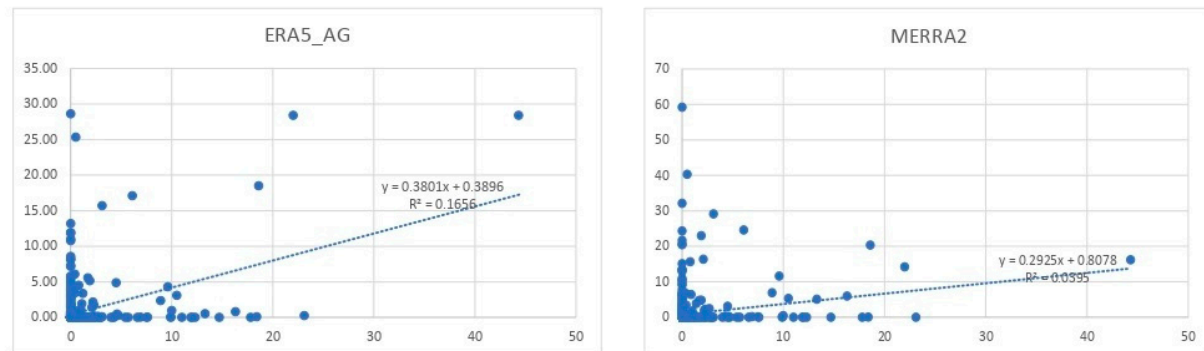

### NEW ESTIMATED R DATA (GHEN) AND ESTIMATED R (Re)

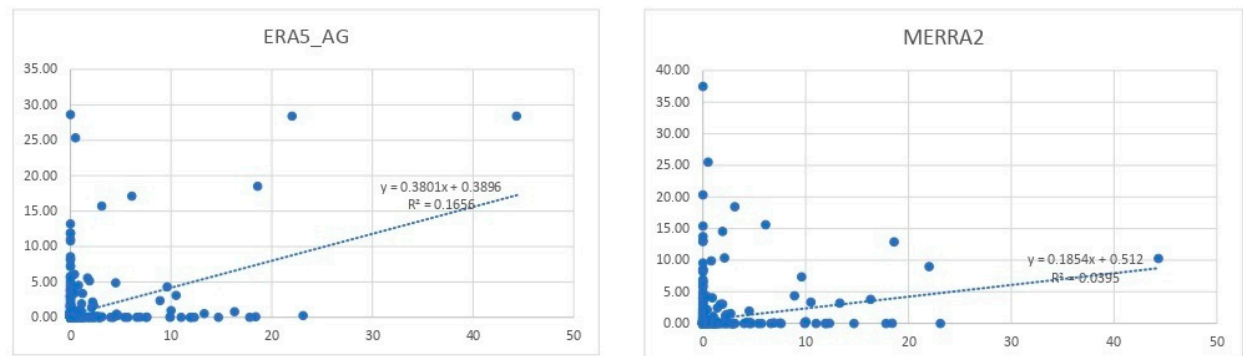

Station 08

ACTUAL VS REANALYSIS DATASET

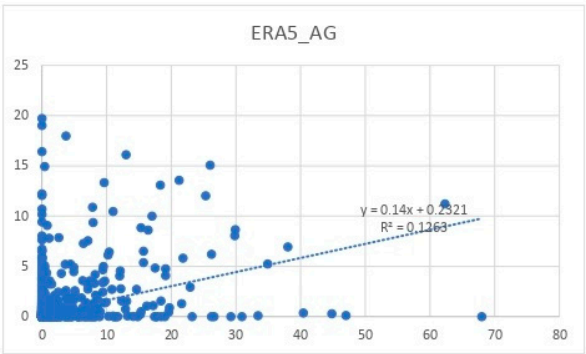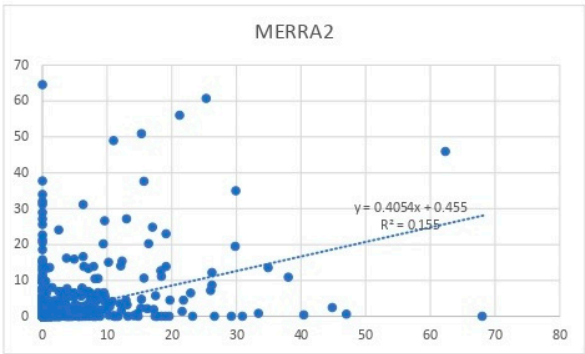

ACTUAL VS MCP

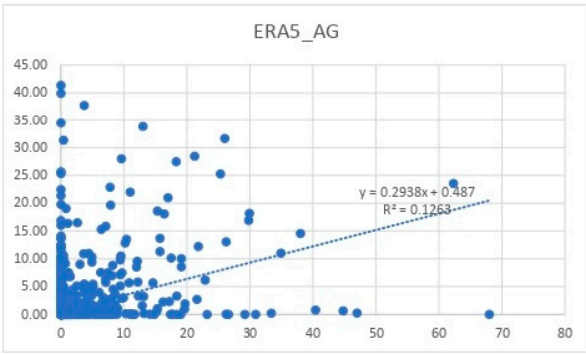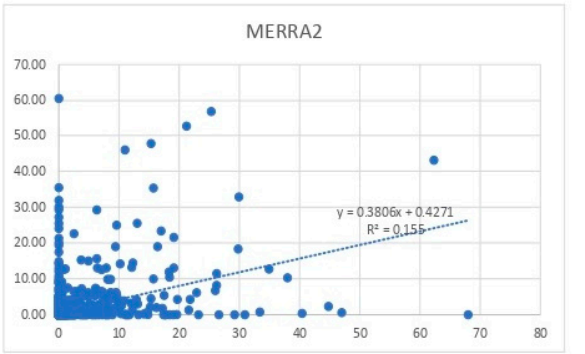

NEW ESTIMATED R DATA (GHIEN) AND ESTIMATED R (Re)

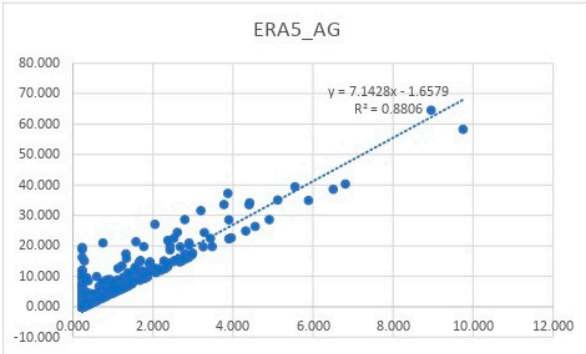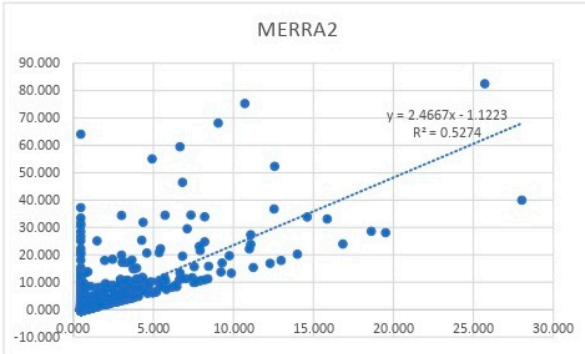

Station 07

ACTUAL VS REANALYSIS DATASET

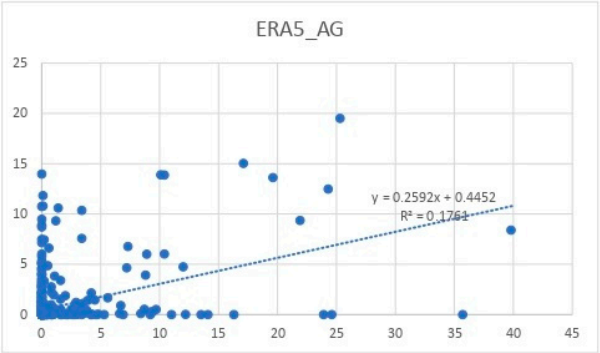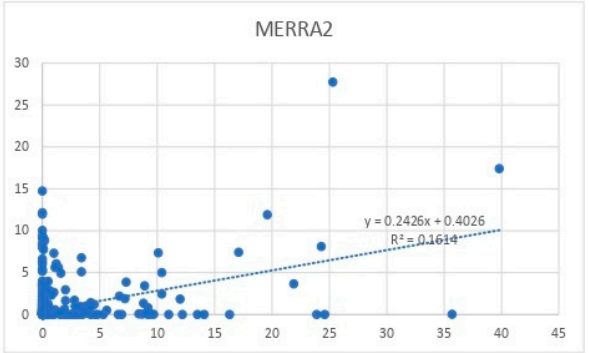

ACTUAL VS MCP

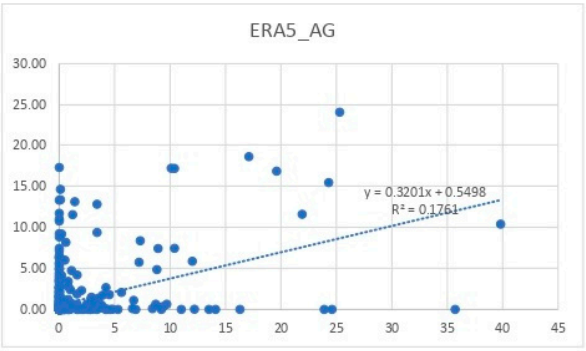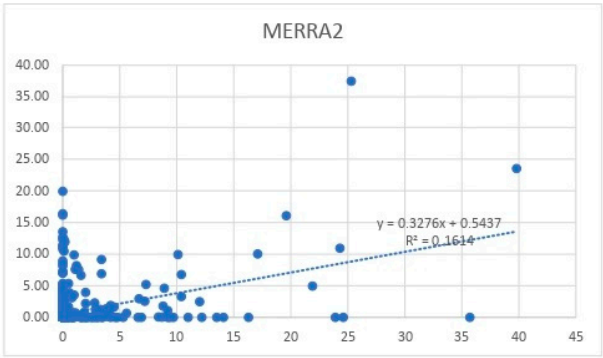

NEW ESTIMATED R DATA (GHIEN) AND ESTIMATED R (Re)

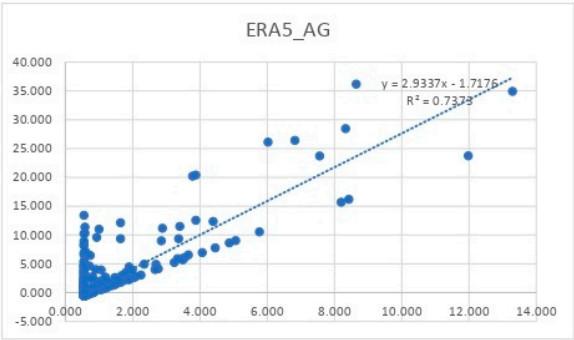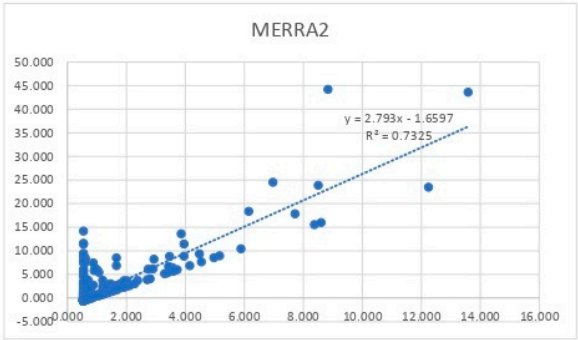

## Station 06

### ACTUAL VS REANALYSIS DATASET

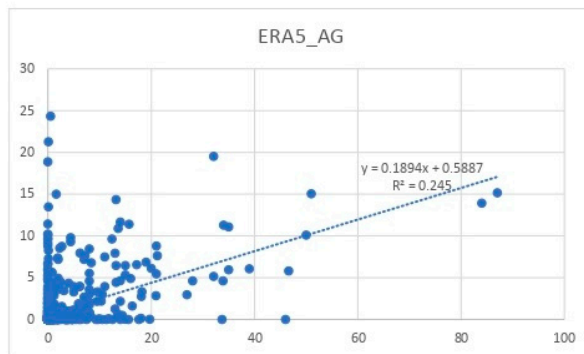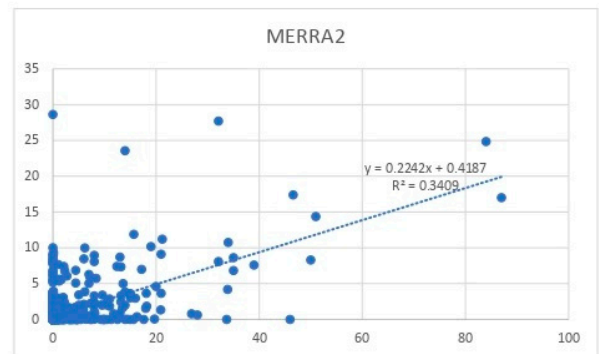

### ACTUAL VS MCP

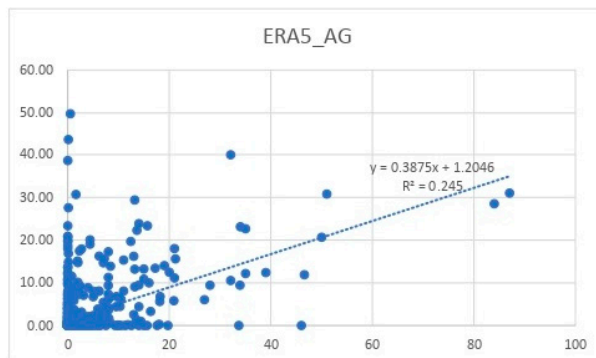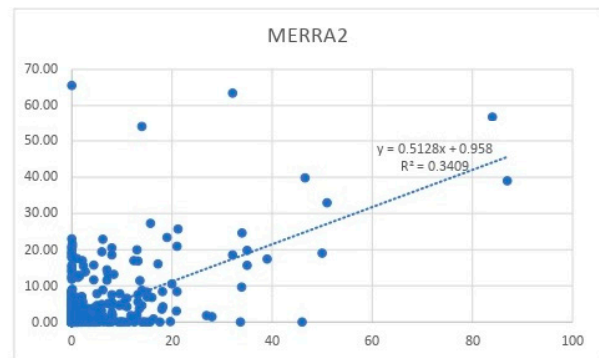

### NEW ESTIMATED R DATA (GHEN) AND ESTIMATED R (Re)

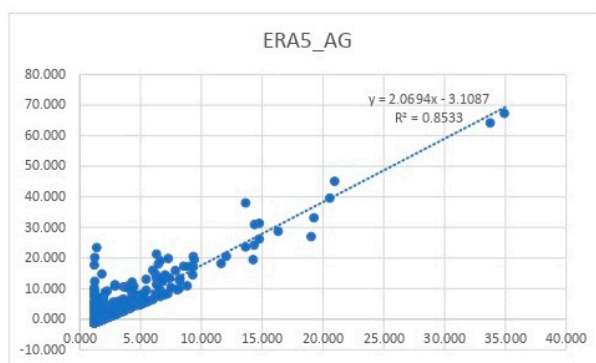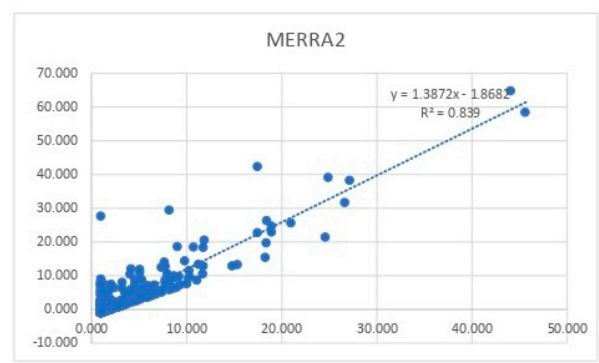

## Station 05

### ACTUAL VS REANALYSIS DATASET

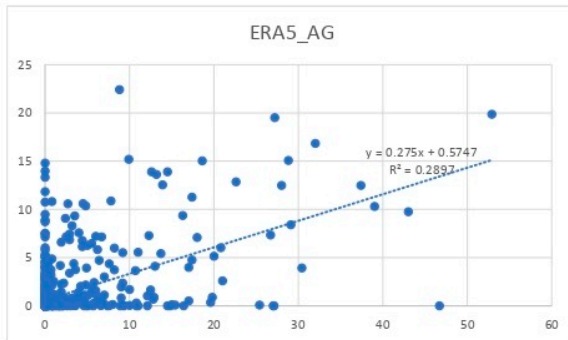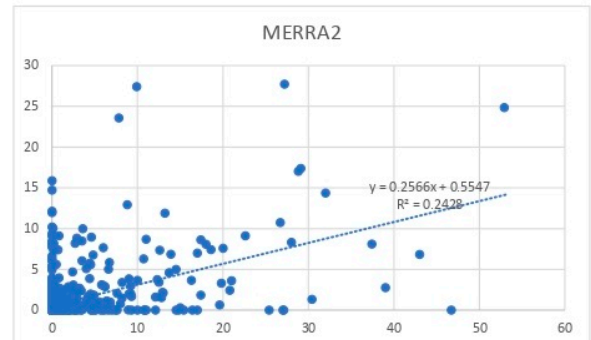

### ACTUAL VS MCP

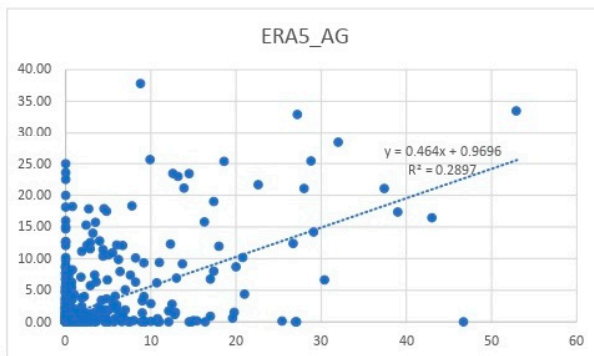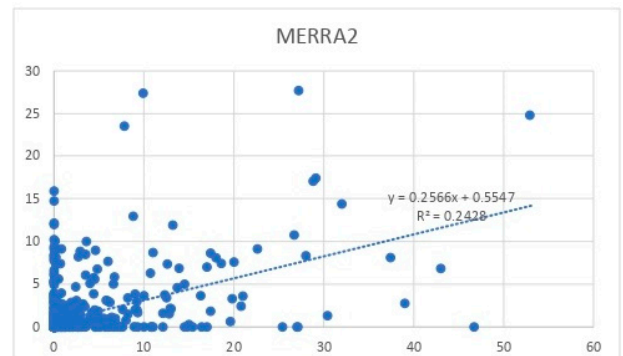

### NEW ESTIMATED R DATA (GHIEEN) AND ESTIMATED R (Re)

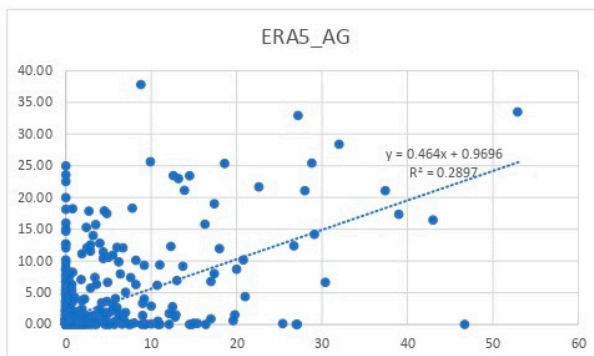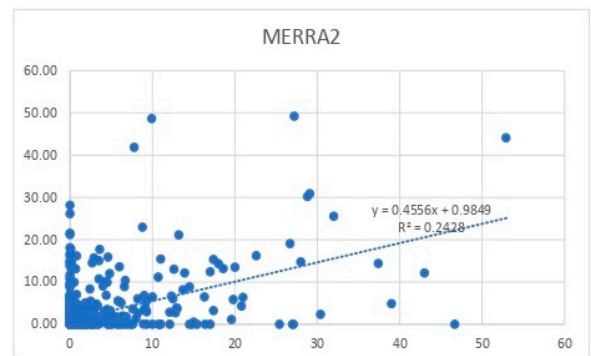



Station 04

ACTUAL VS REANALYSIS DATASET

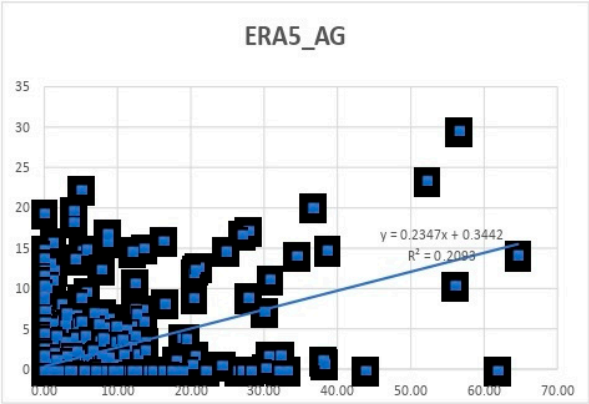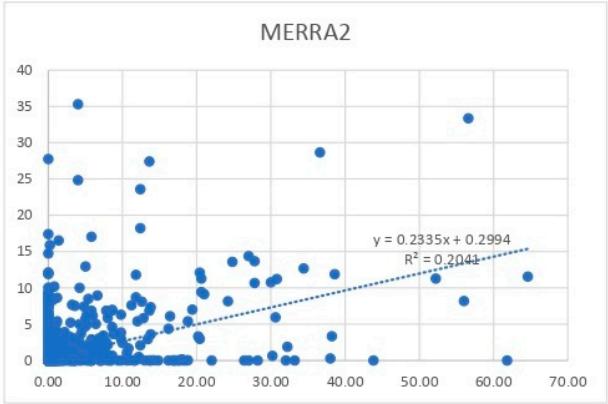

ACTUAL VS MCP

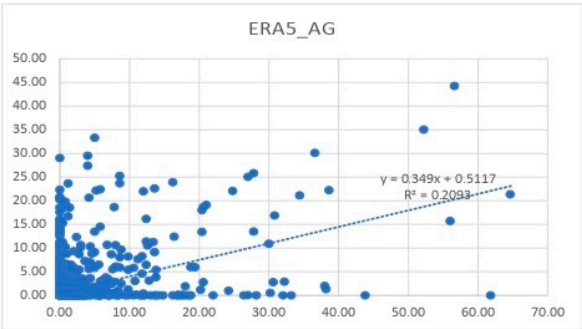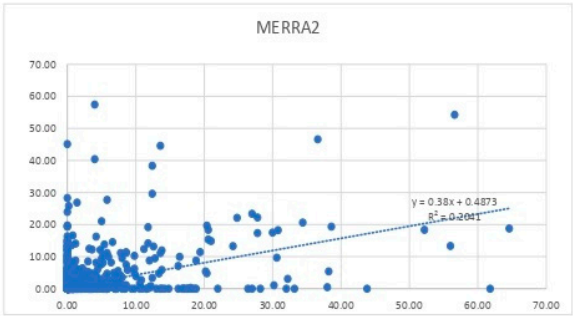

NEW ESTIMATED R DATA (GHIEN) AND ESTIMATED R (Re)

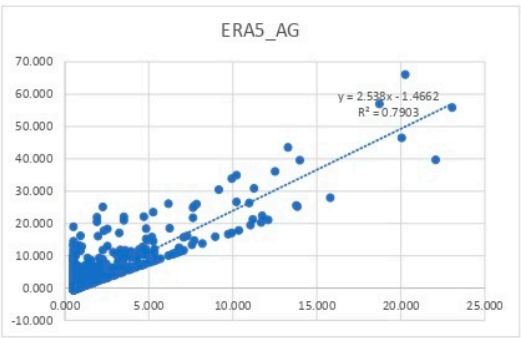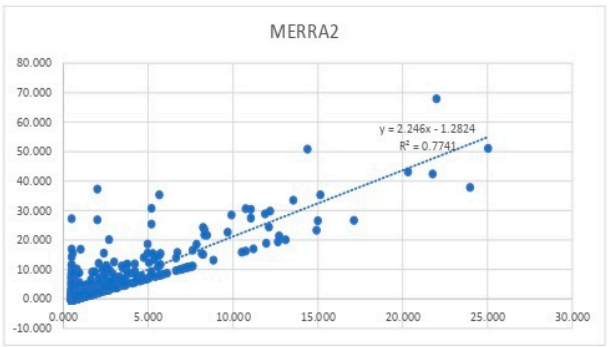

Station 03

ACTUAL VS REANALYSIS DATASET

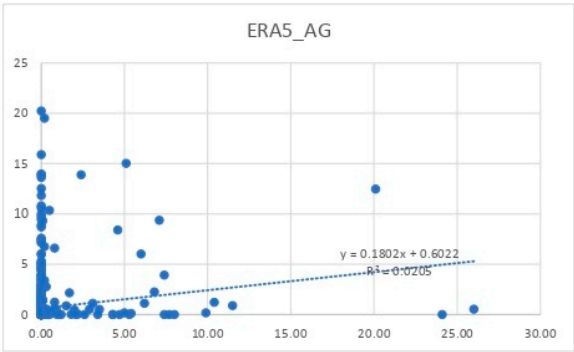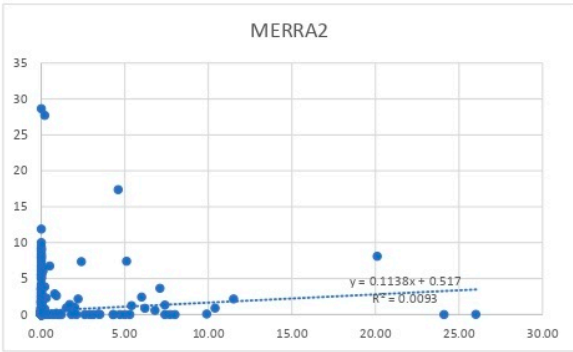

ACTUAL VS MCP

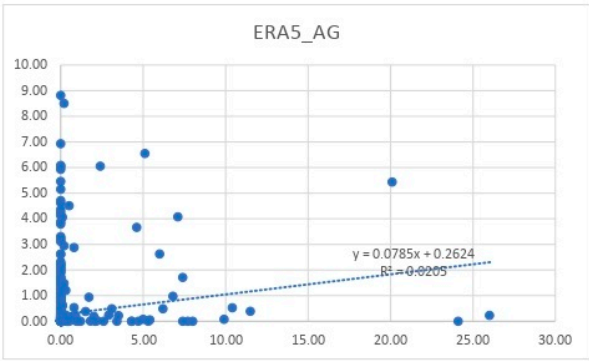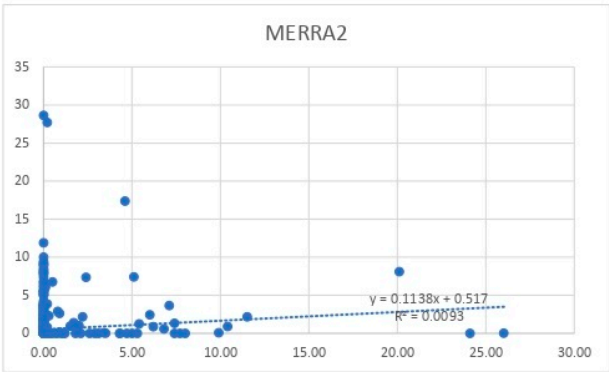

NEW ESTIMATED R DATA (GHIEN) AND ESTIMATED R (Re)

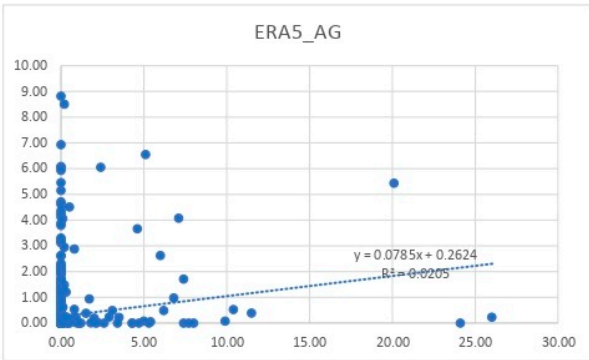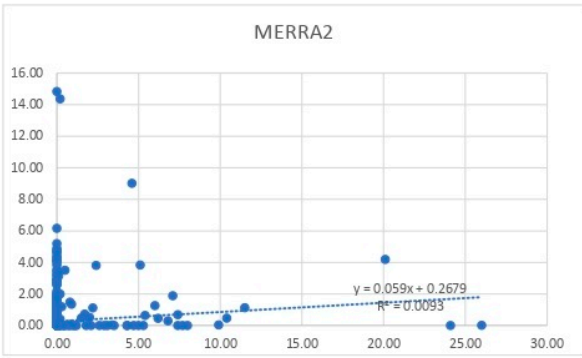



## Station 02

### ACTUAL VS REANALYSIS DATASET

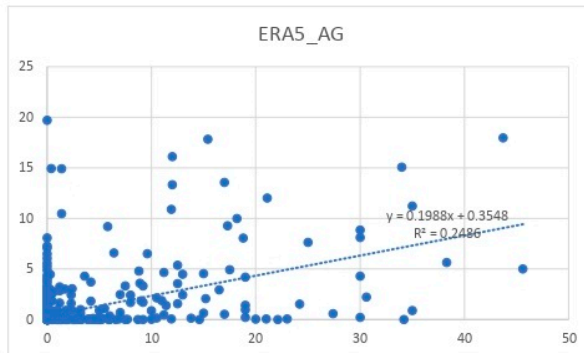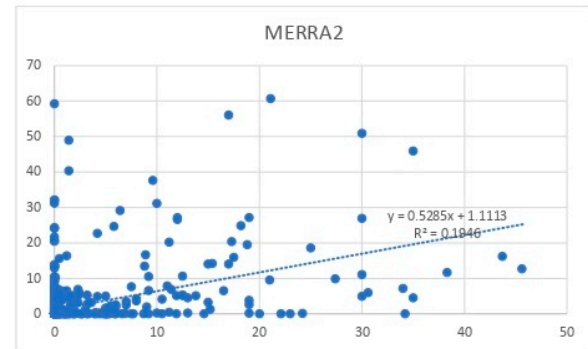

### ACTUAL VS MCP

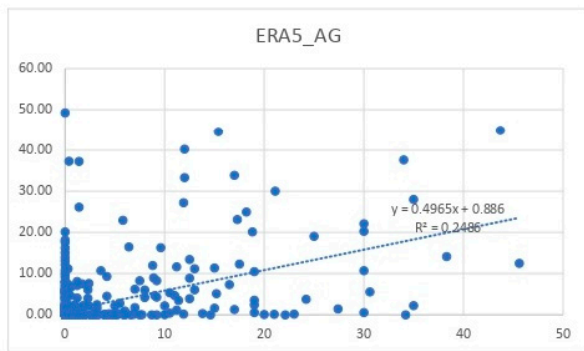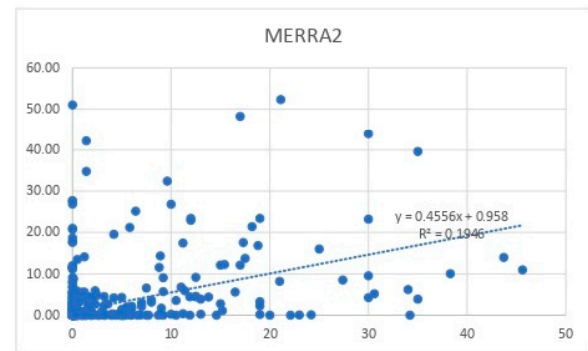

### NEW ESTIMATED R DATA (GHEN) AND ESTIMATED R (Re)

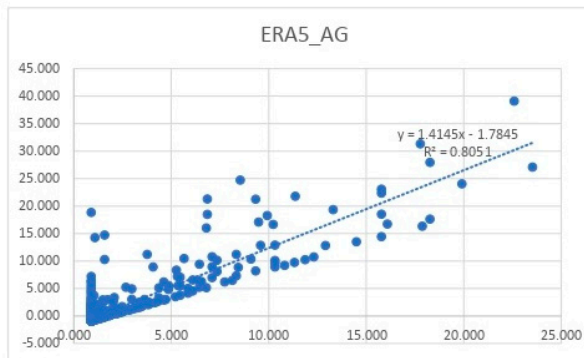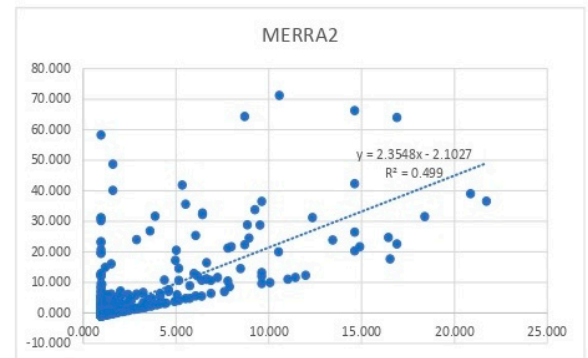

## Station 01

### ACTUAL VS REANALYSIS DATASET

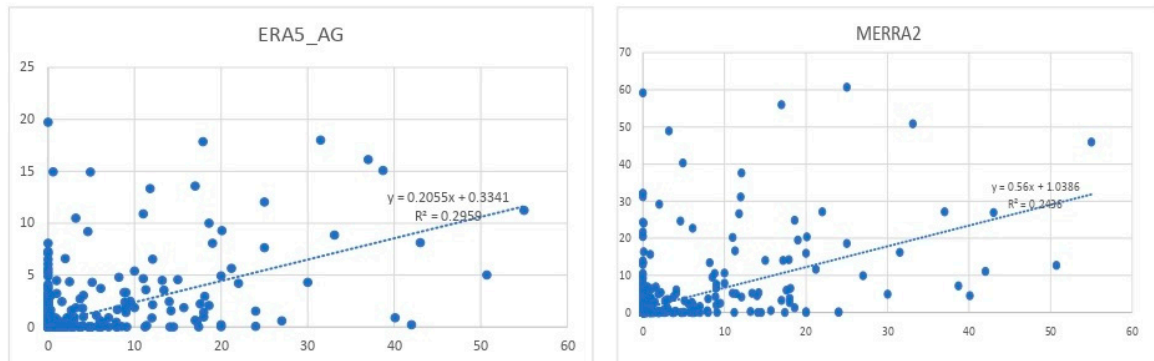

### ACTUAL VS MCP

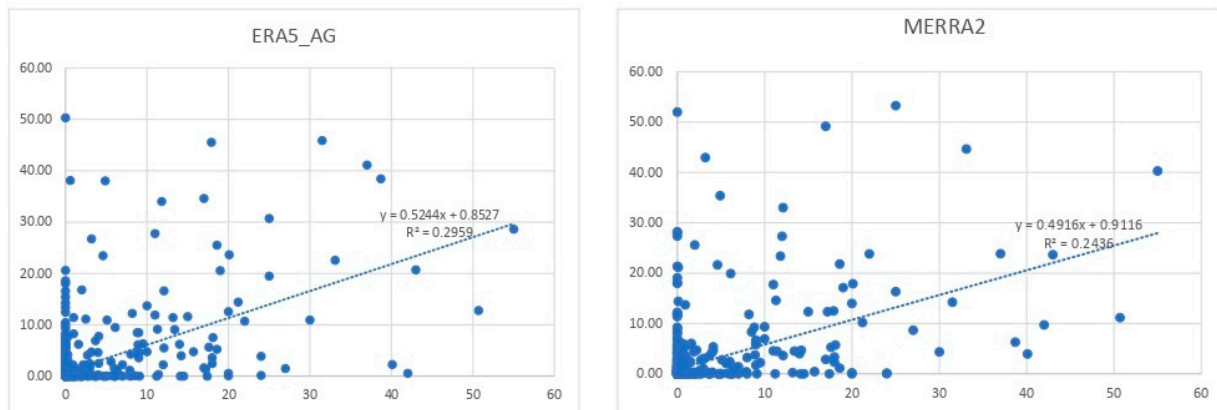

### NEW ESTIMATED R DATA (GHEN) AND ESTIMATED R (Re)

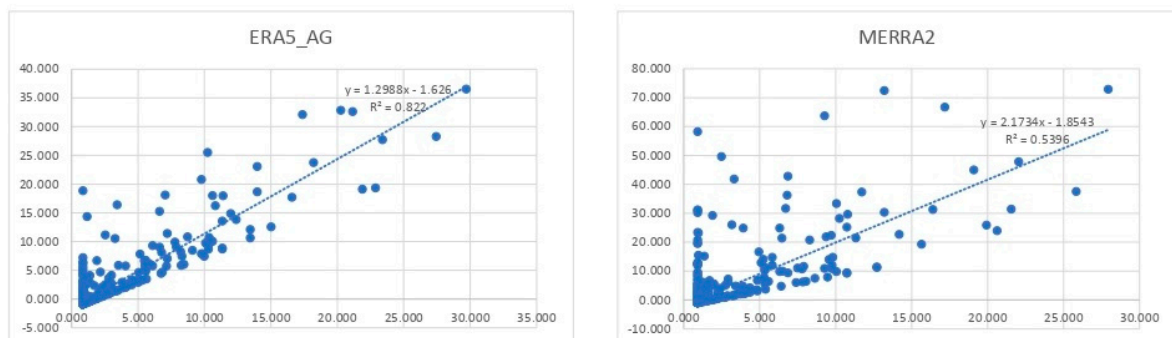

## Station 14

### ACTUAL VS REANALYSIS DATASET

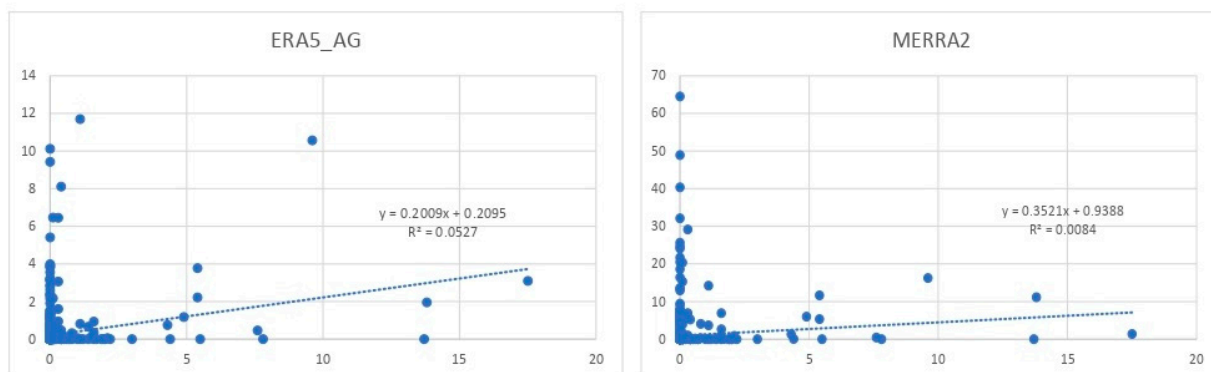

### ACTUAL VS MCP

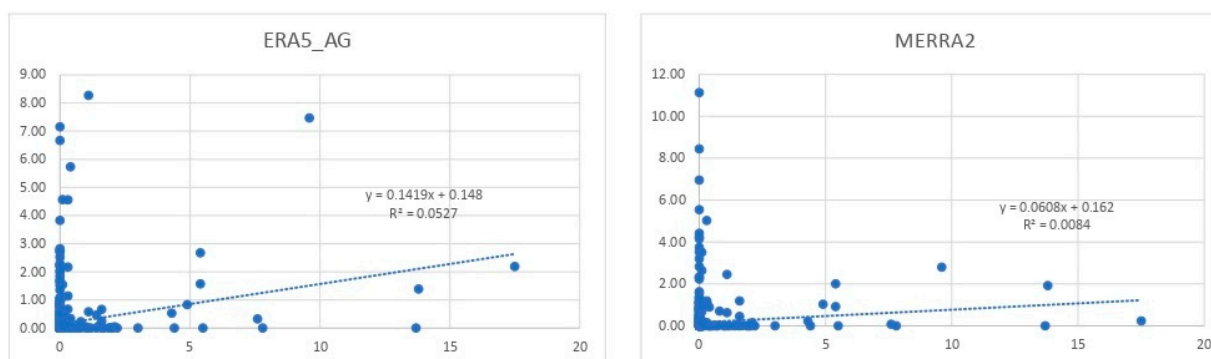

### NEW ESTIMATED R DATA (GHEN) AND ESTIMATED R (Re)

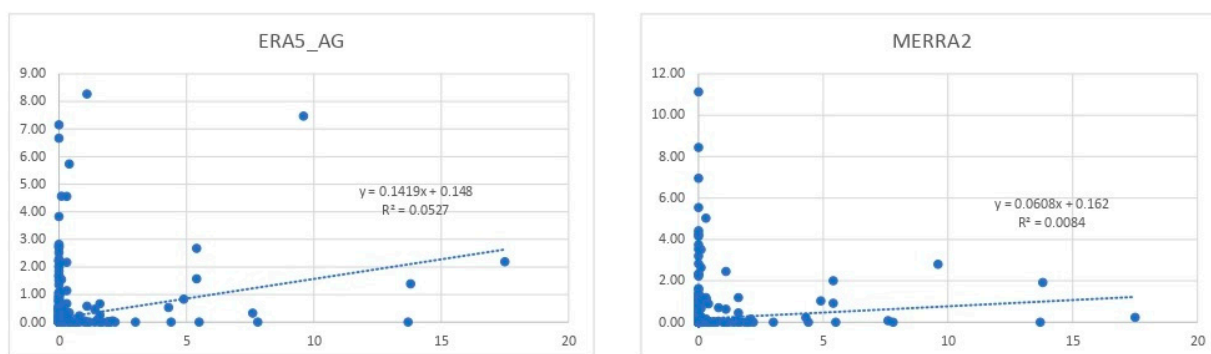

**Figure S15.**Scatter plot diagram -correction methods

# Basin -07

Actual vs observed data

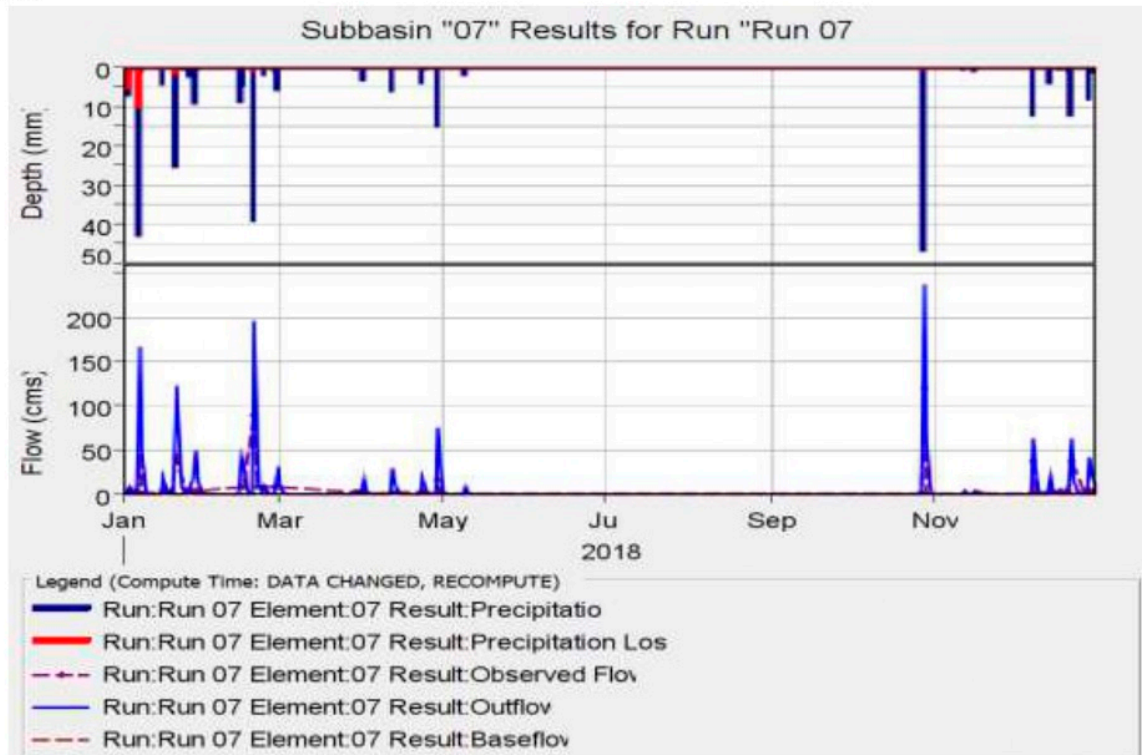

ERA5 vs observed data

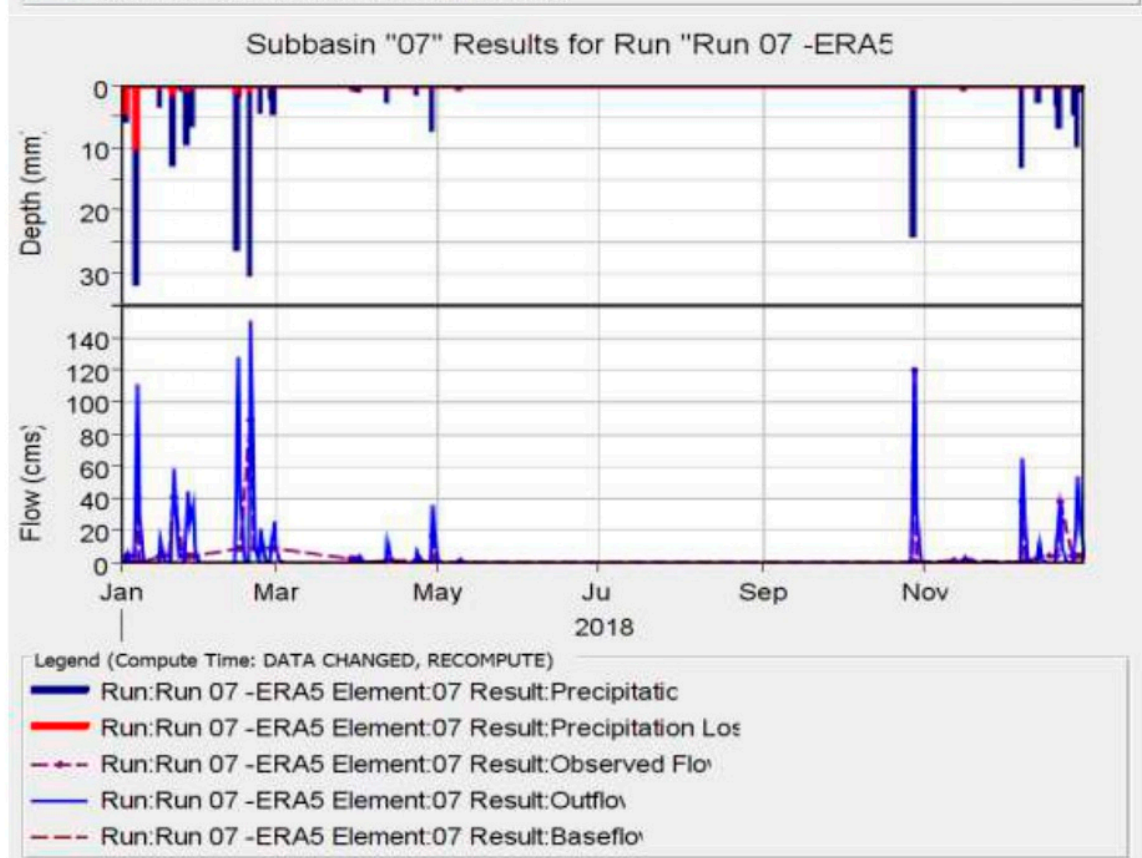

Basin 06

Actual vs observed data

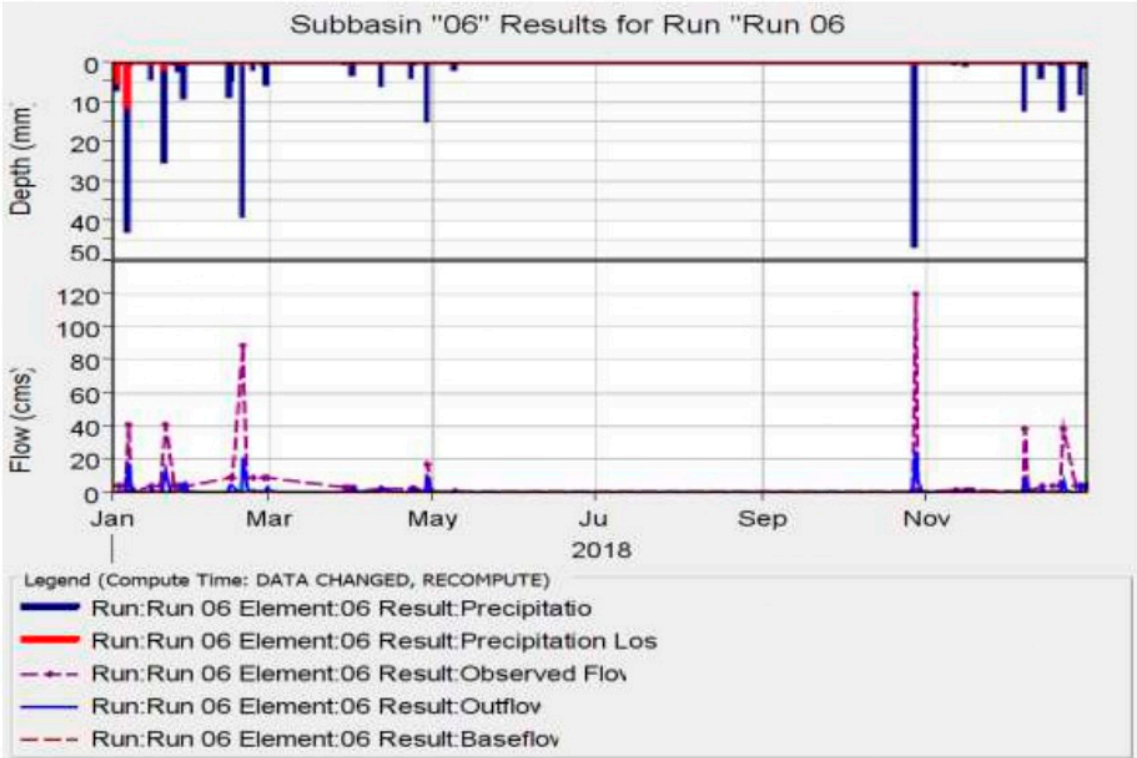

ERA vs observed data

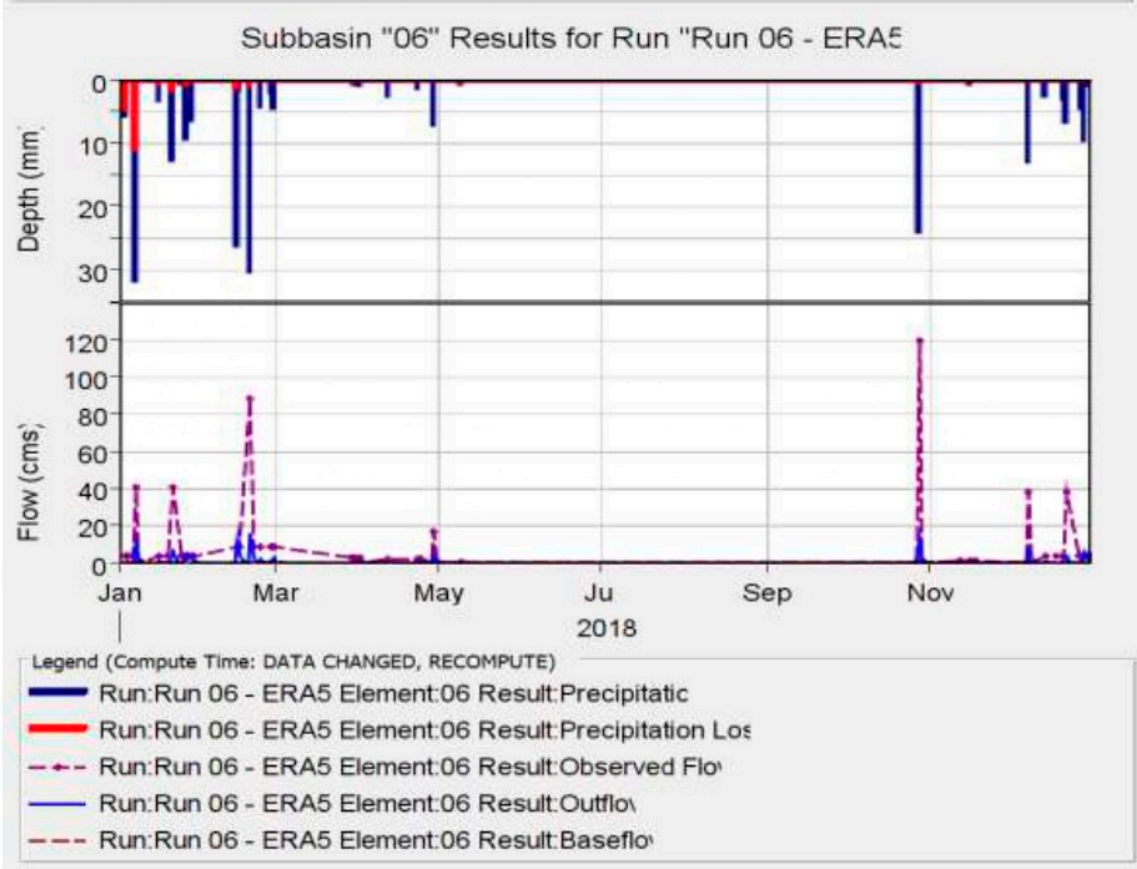



# Basin -05

Actual vs observed data

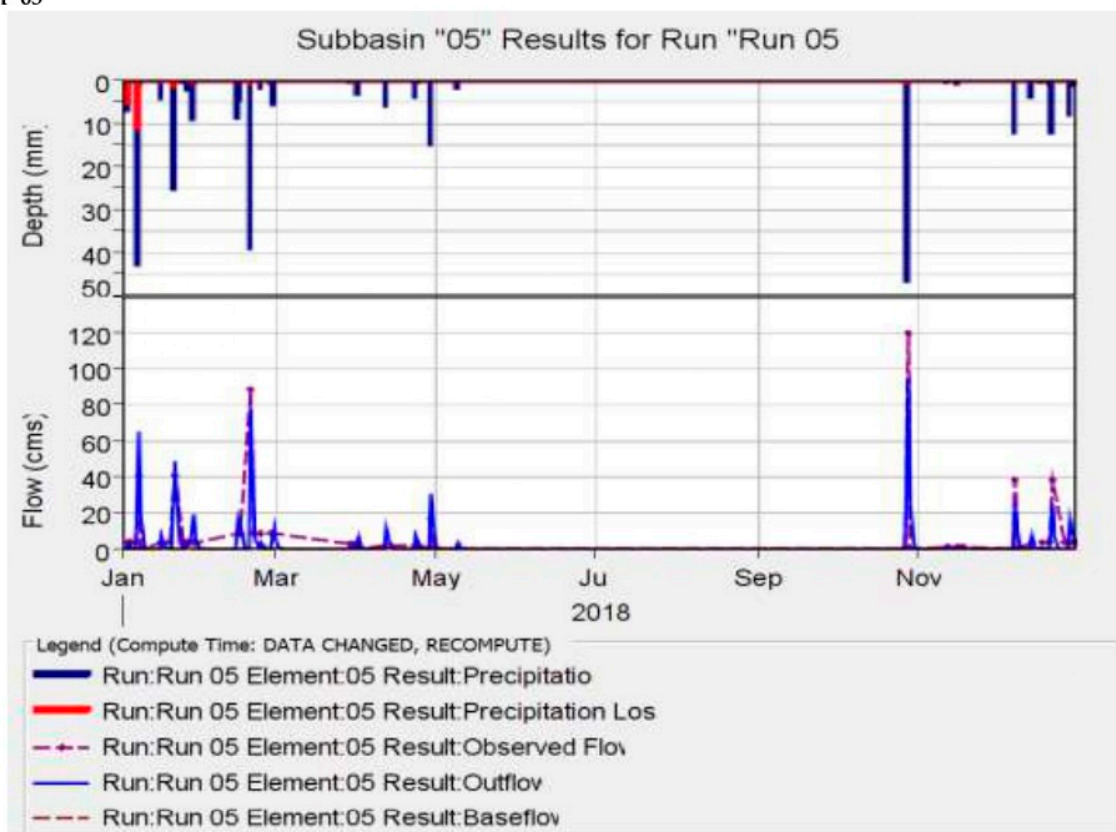

ERA vs observed data

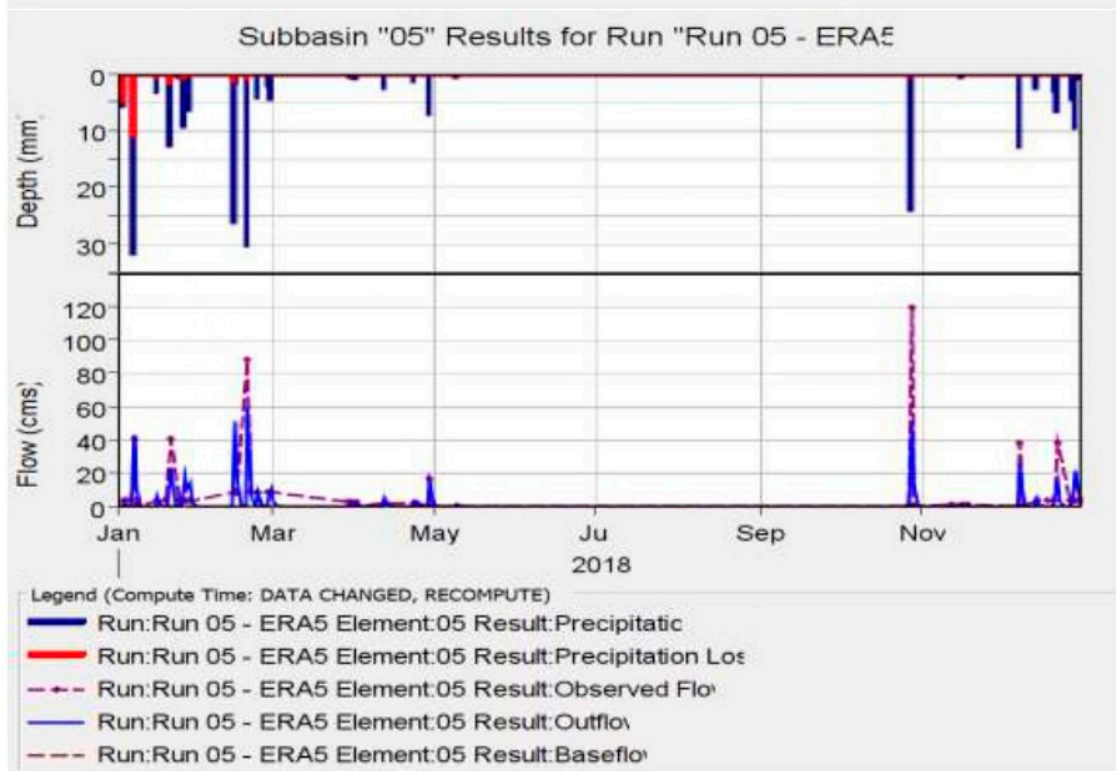



Basin -04

Actual vs observed data

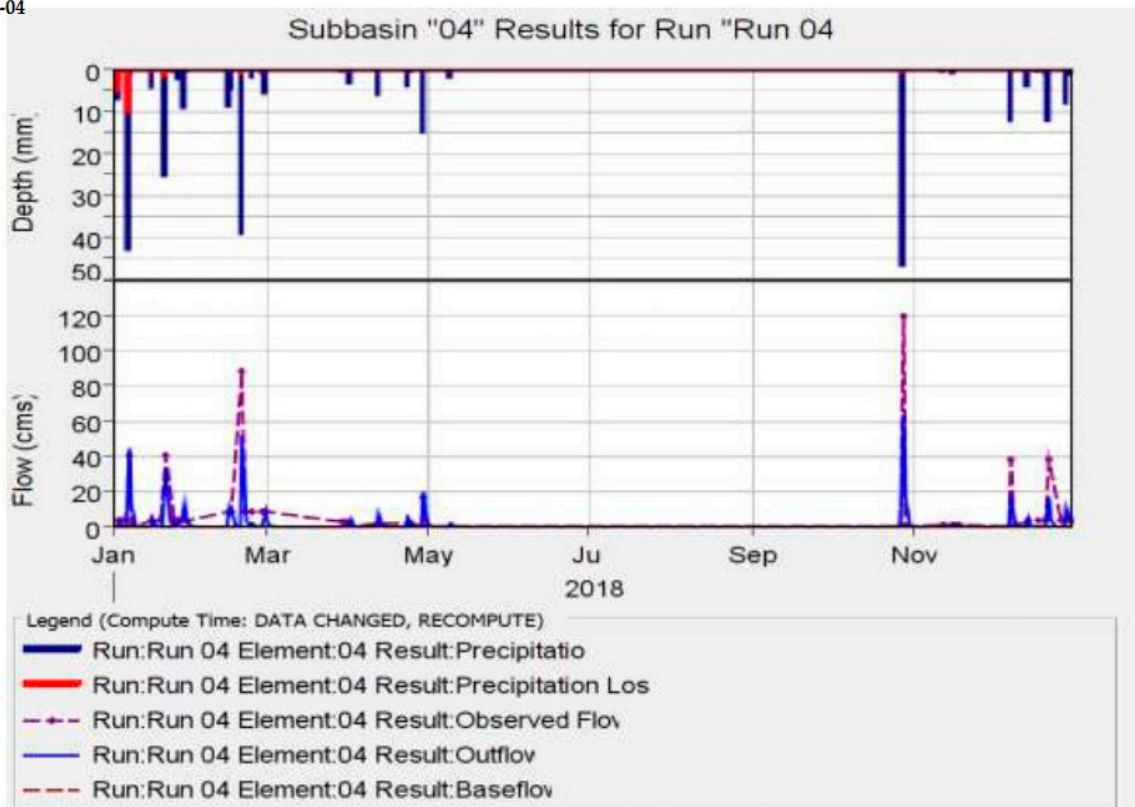

ERA5 vs observed data

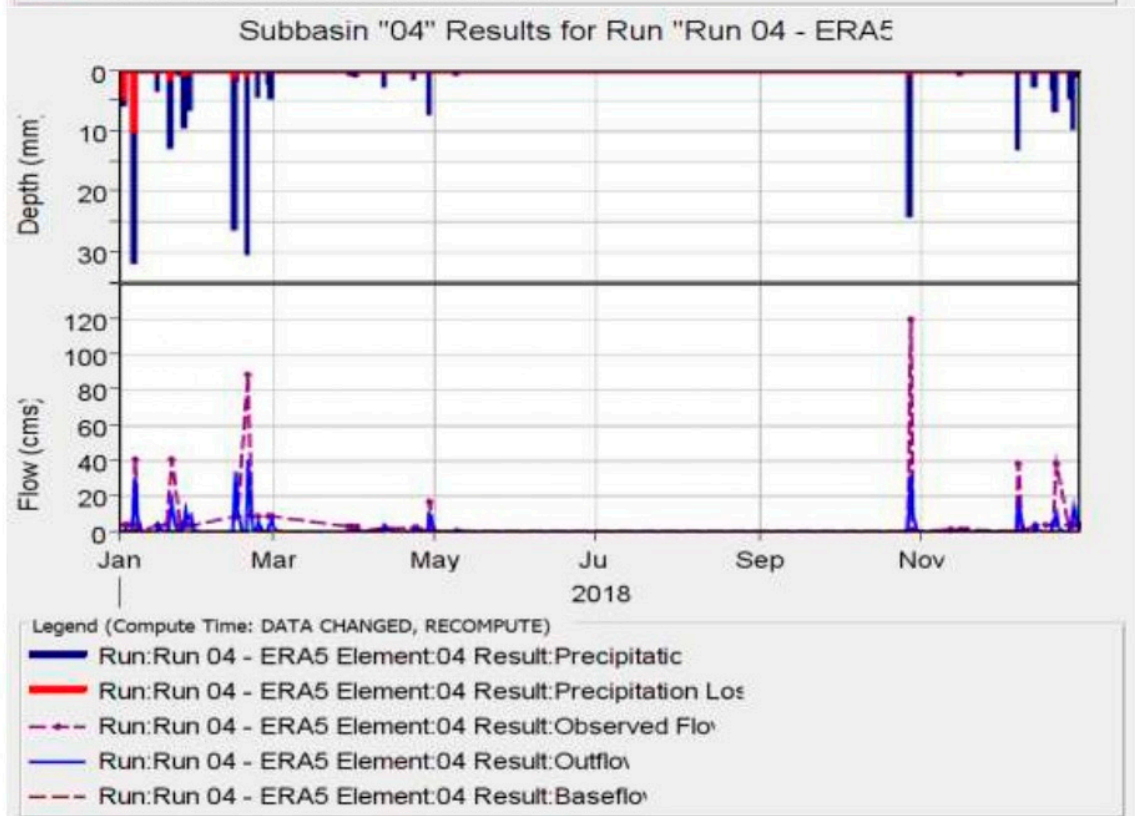

Basin -03

Actual vs observed data

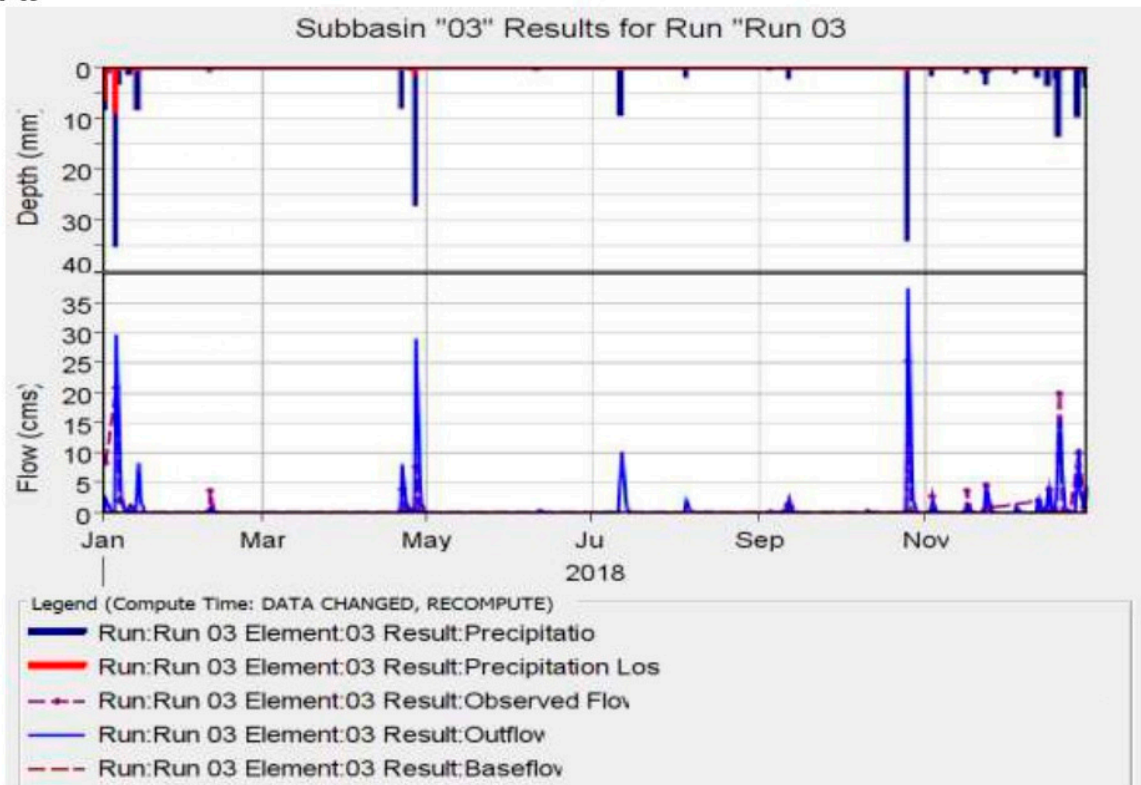

ERA5 vs observed data

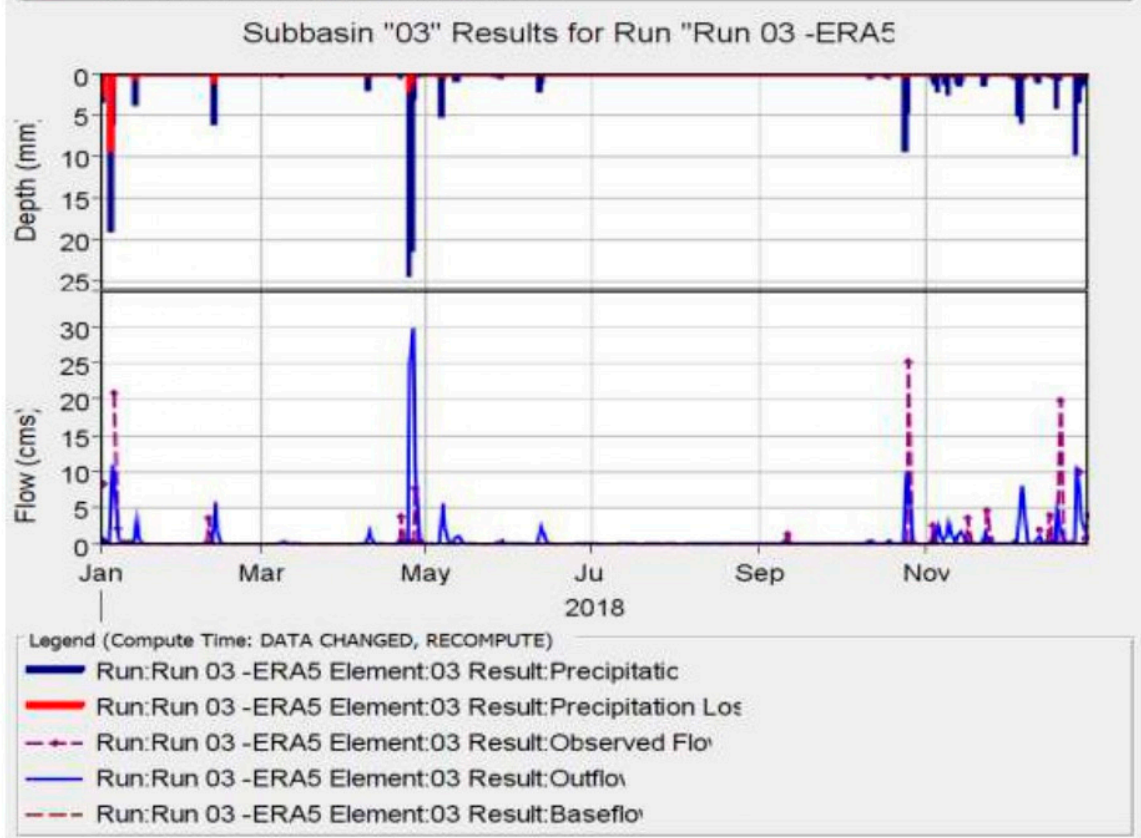

Basin -04

Basin -02

Actual vs observed data

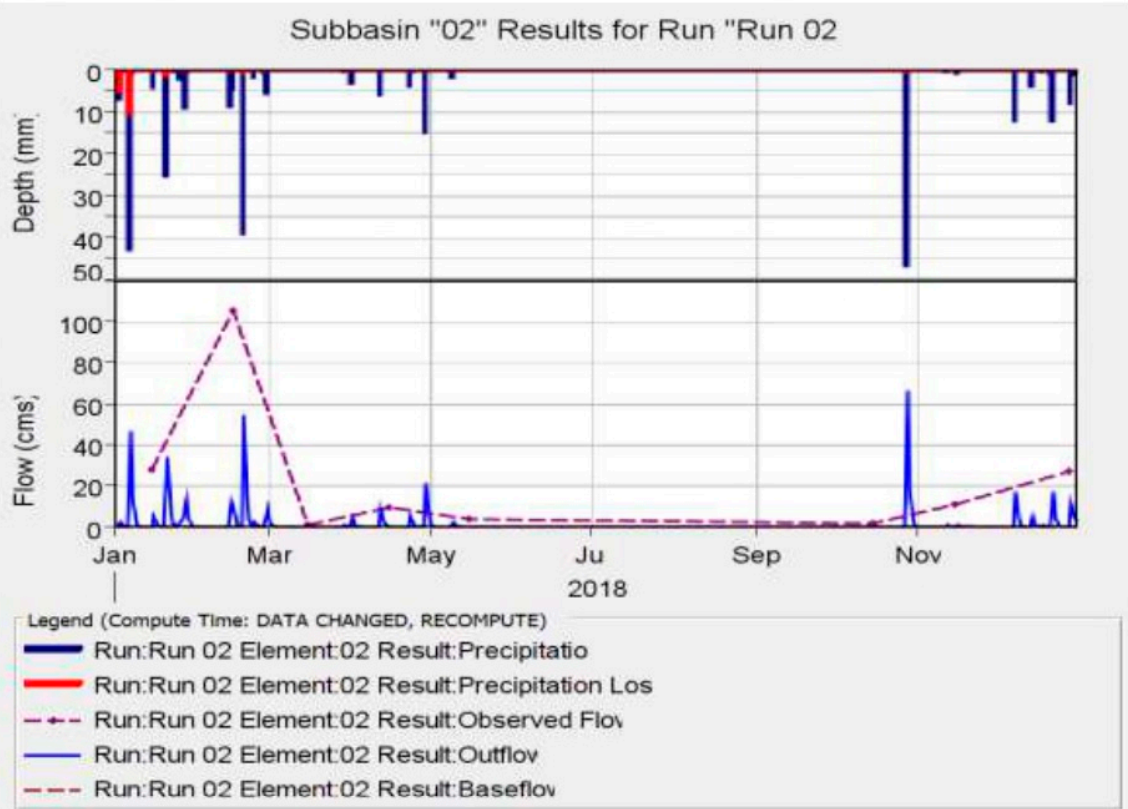

ERA5 vs observed data

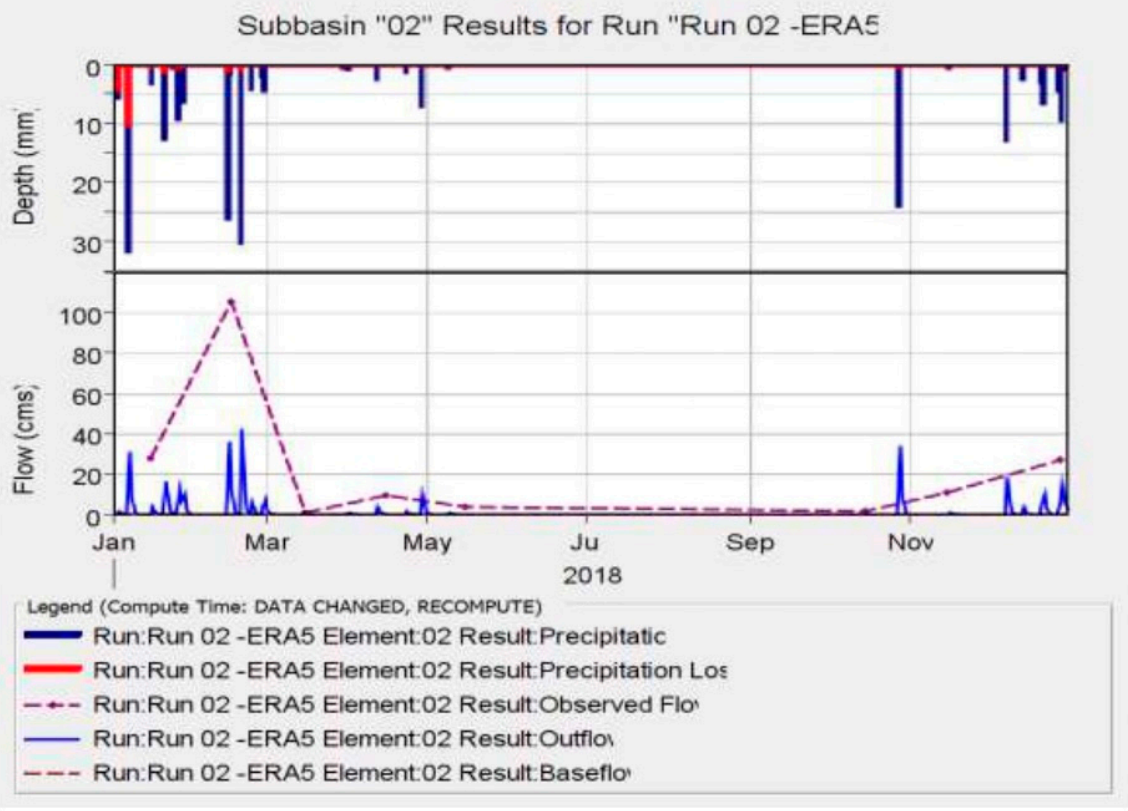



# Basin -01

Actual vs observed data

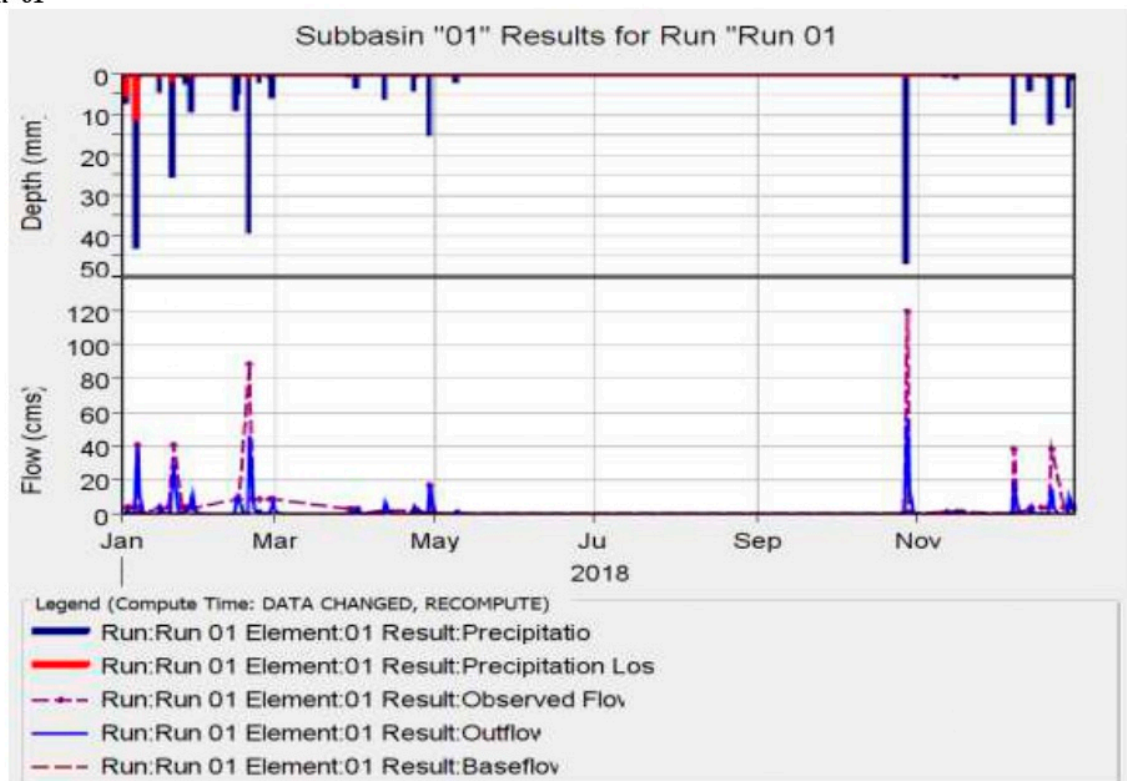

ERA5 vs observed data

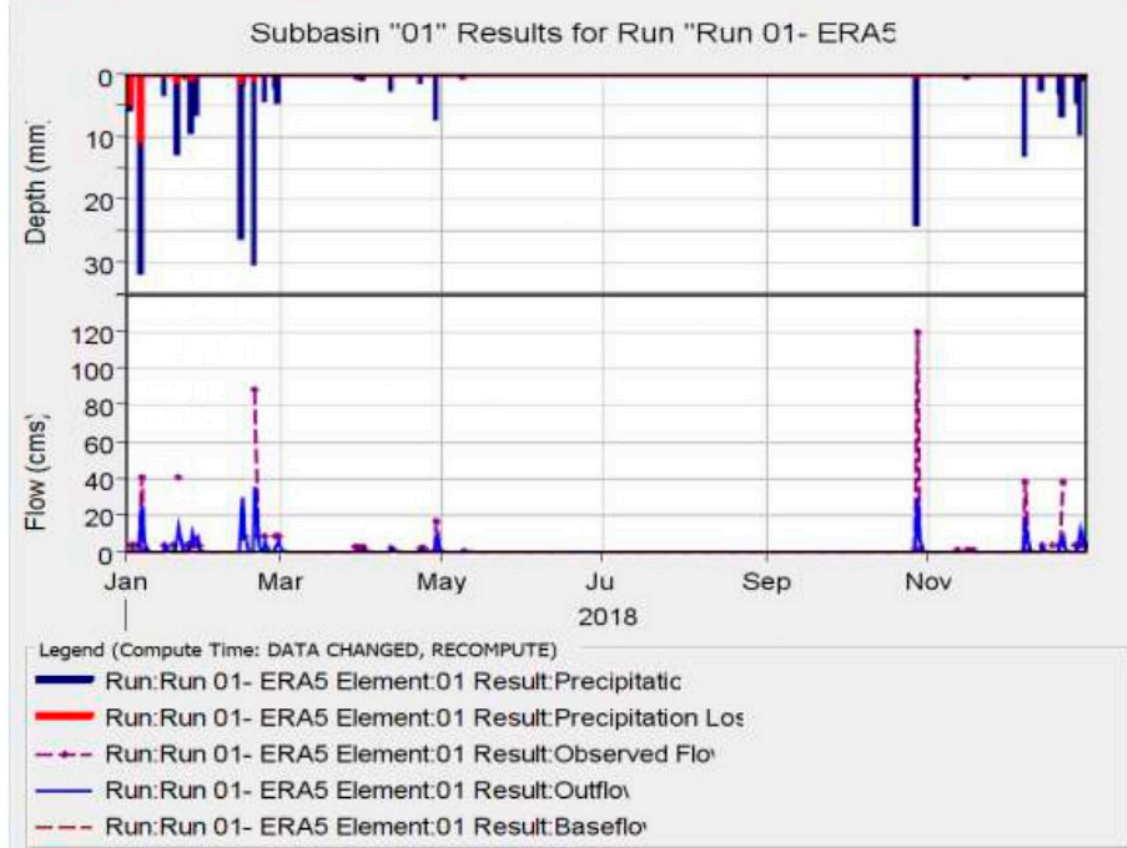

# Basin -15

Actual vs observed data

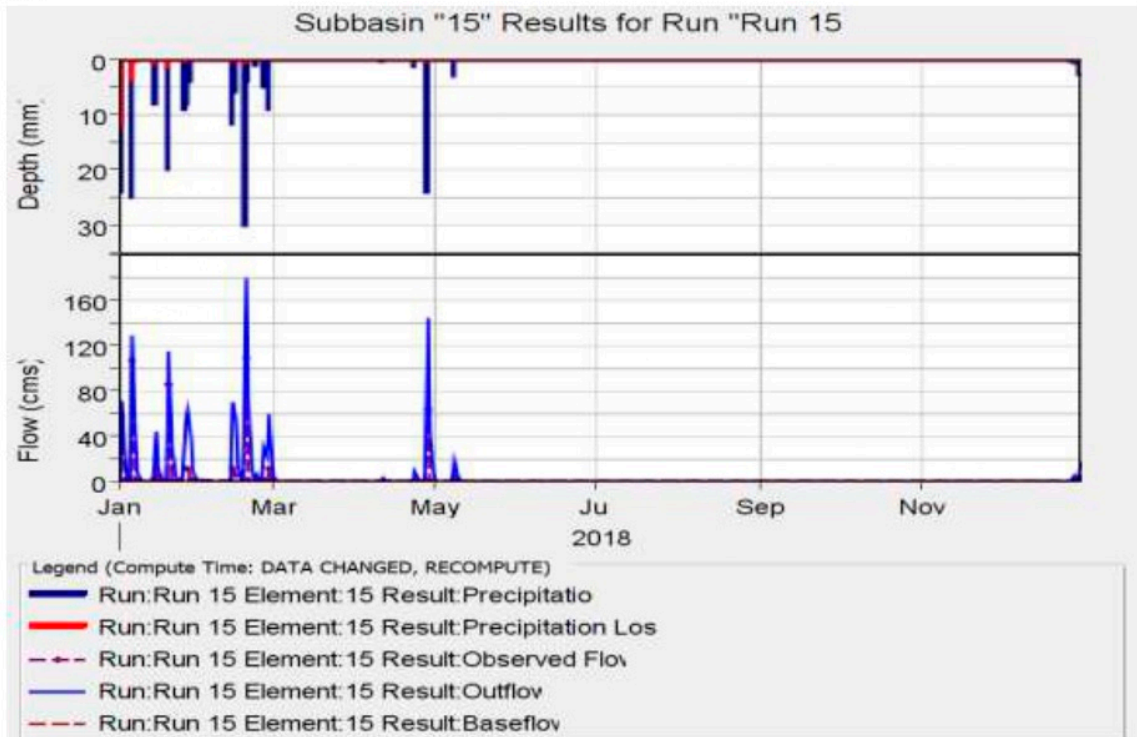

ERA5 vs observed data

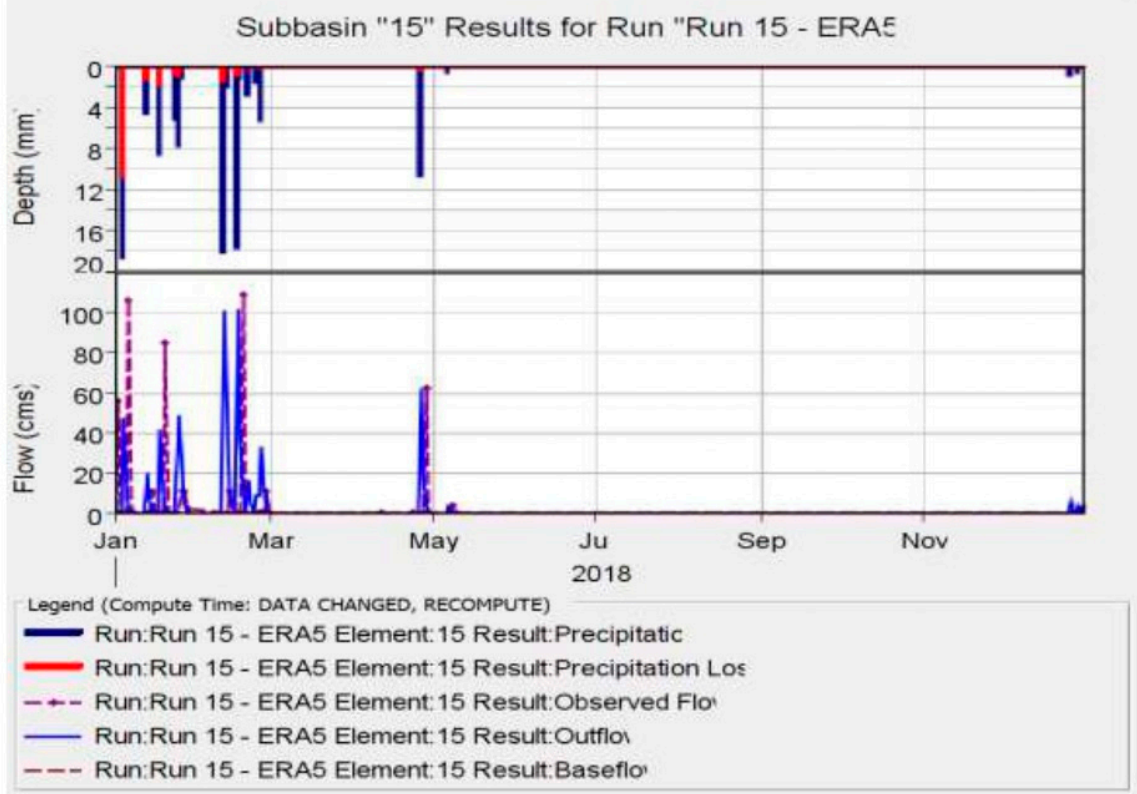

Basin -14

Actual vs observed data

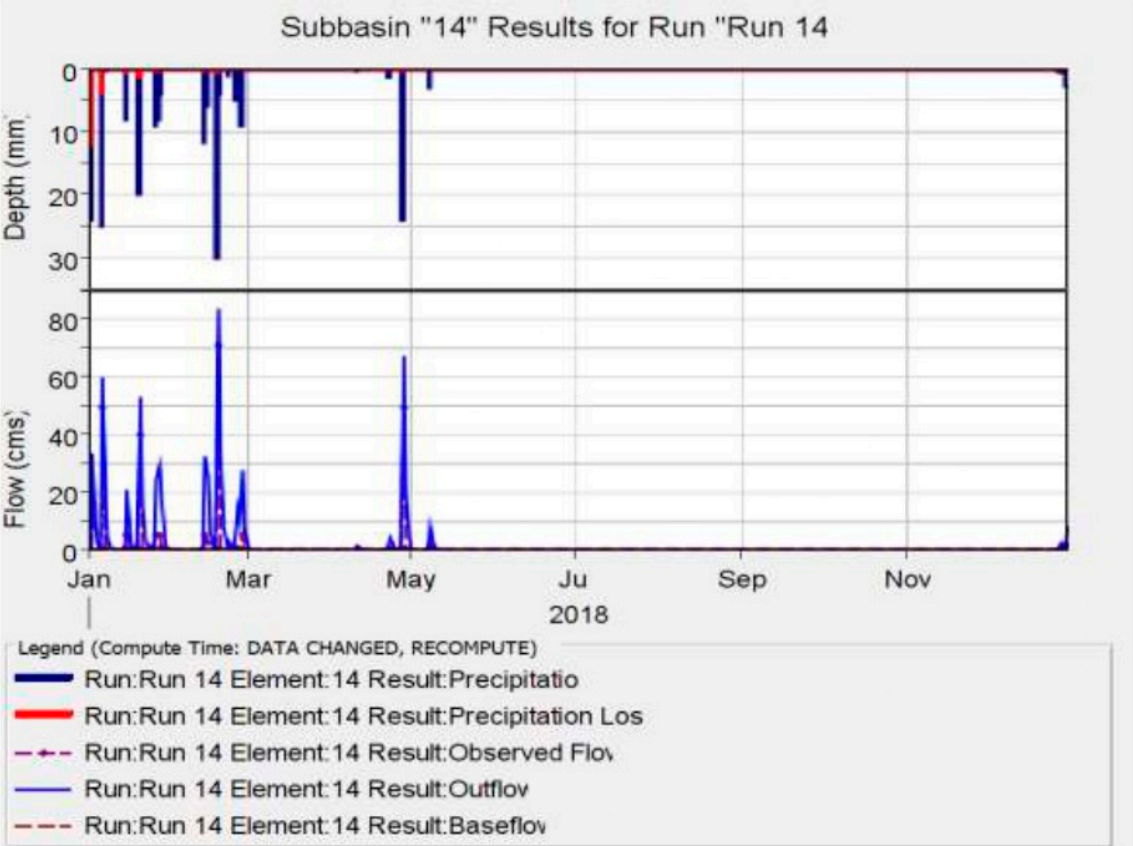

ERA5 vs observed data

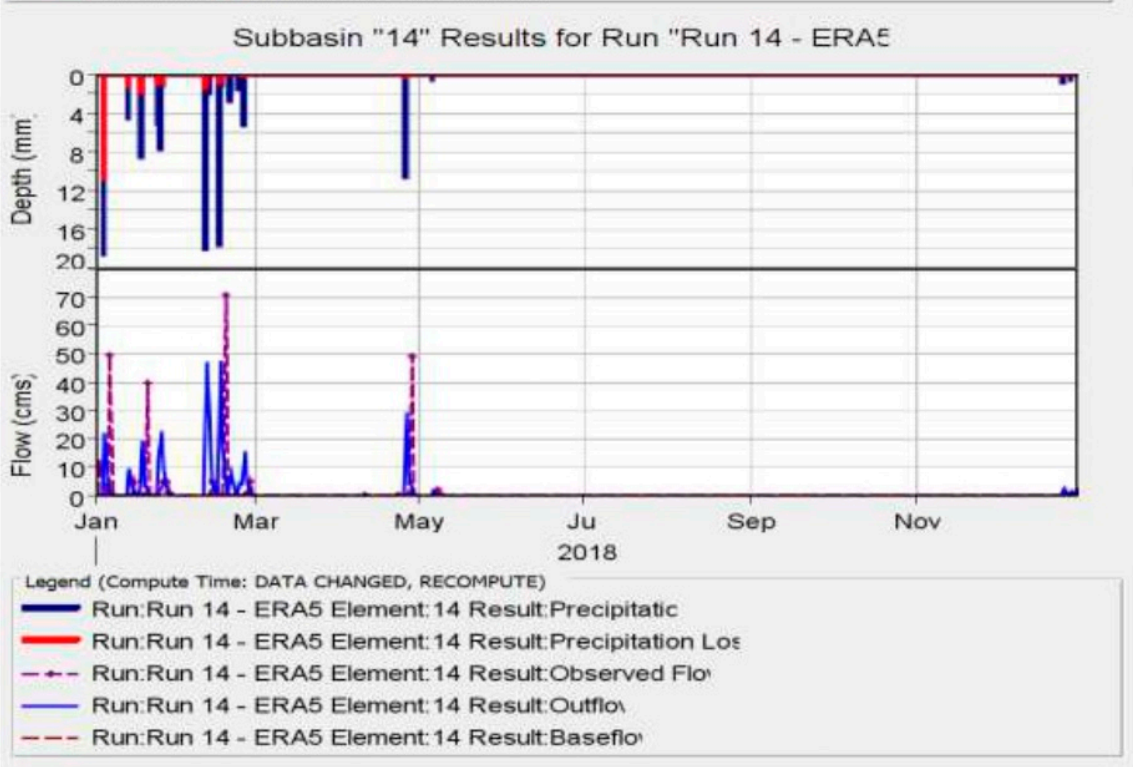



Basin -13

Actual vs observed data

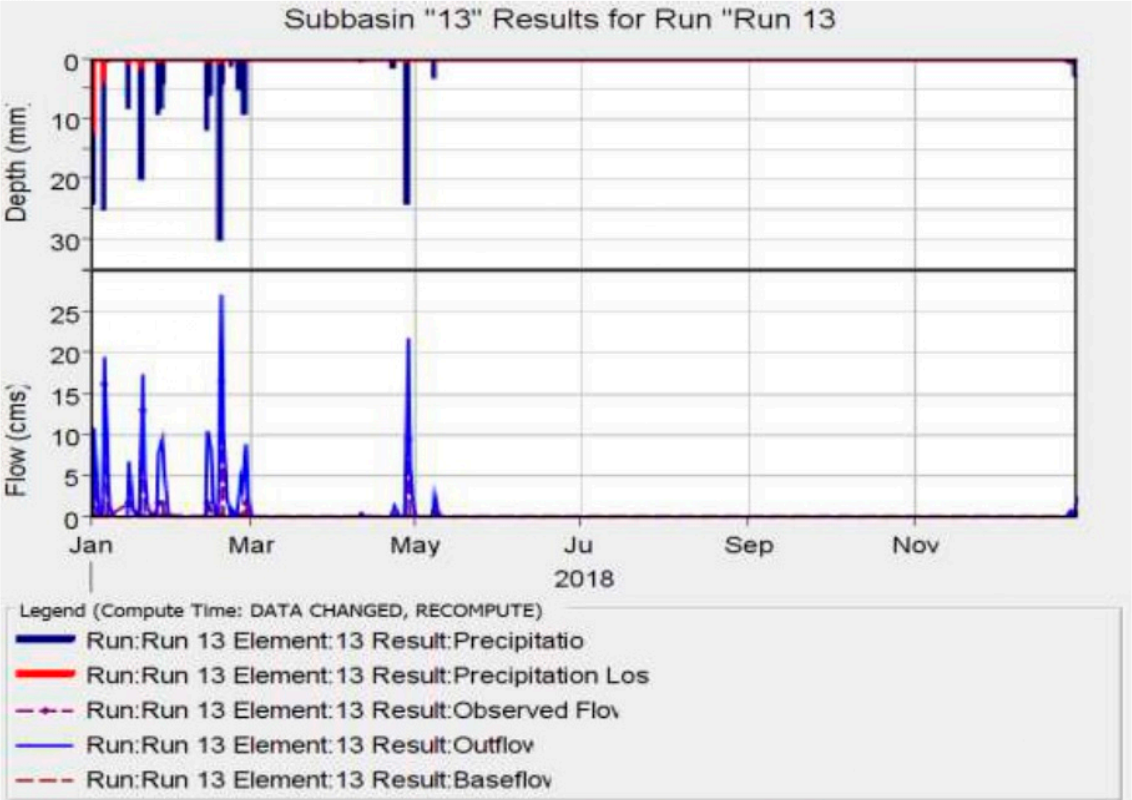

ERA5 vs observed data

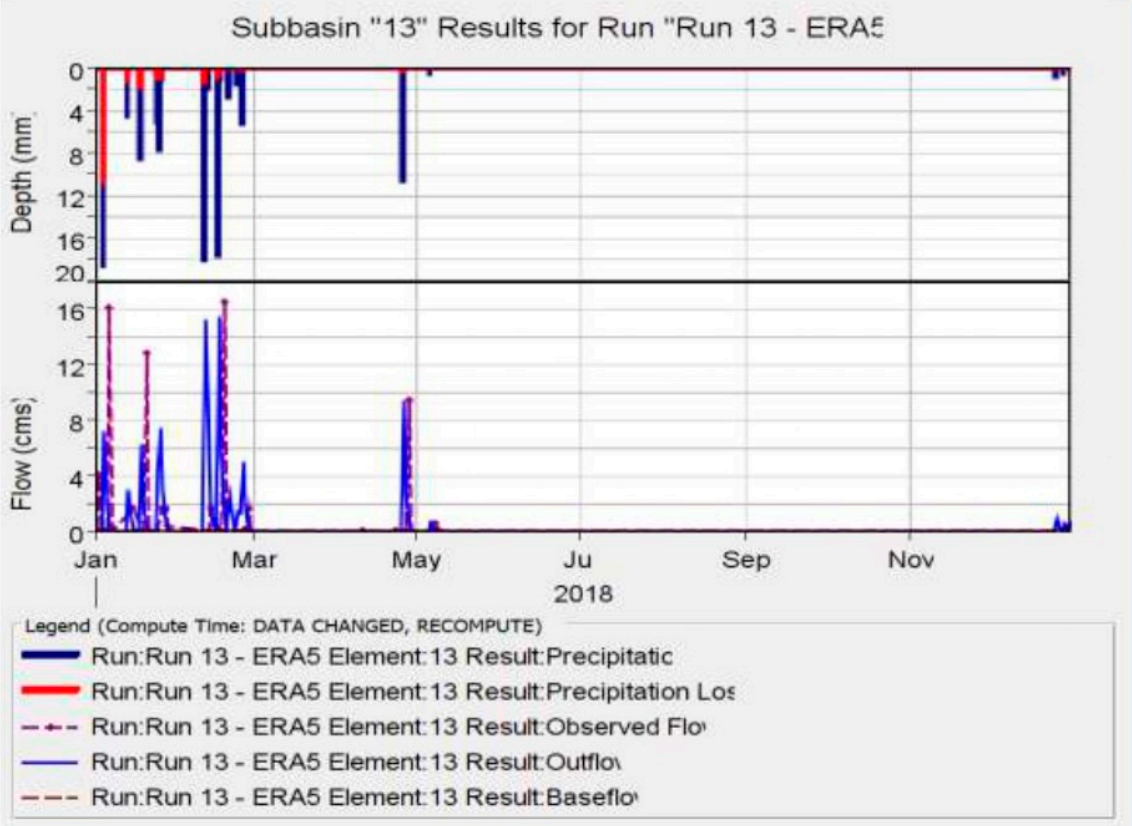

# Basin -12

Actual vs observed data

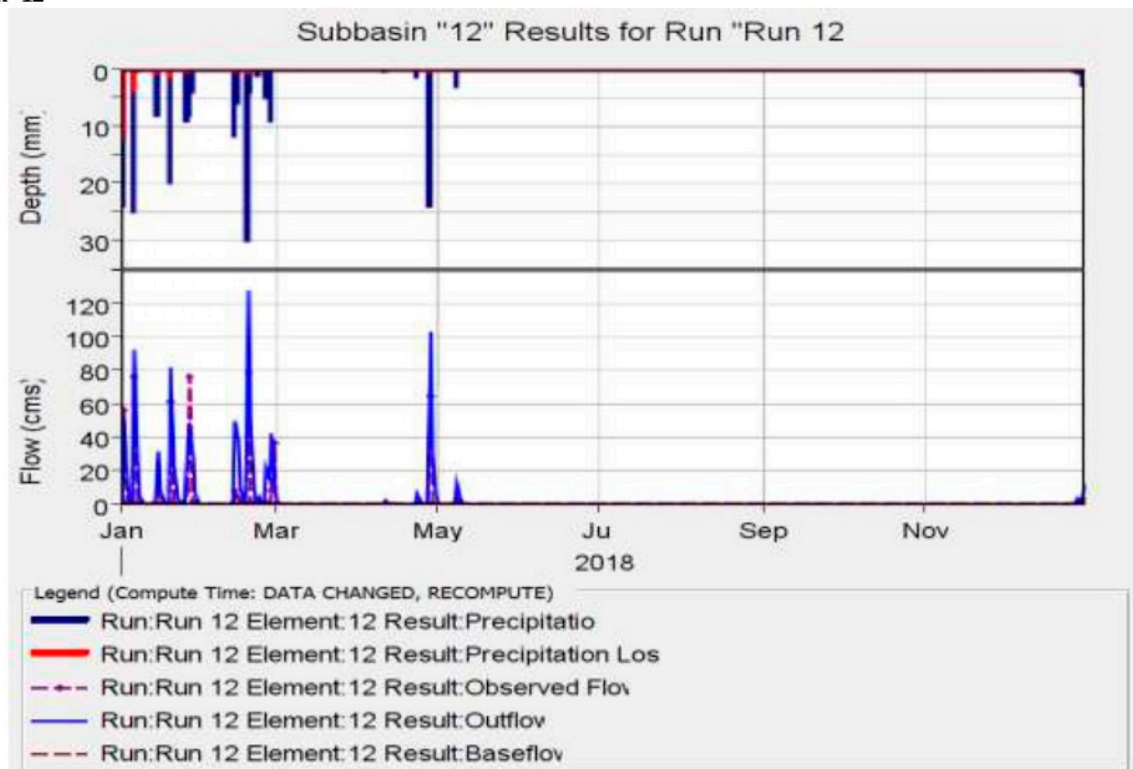

ERA5 vs observed data

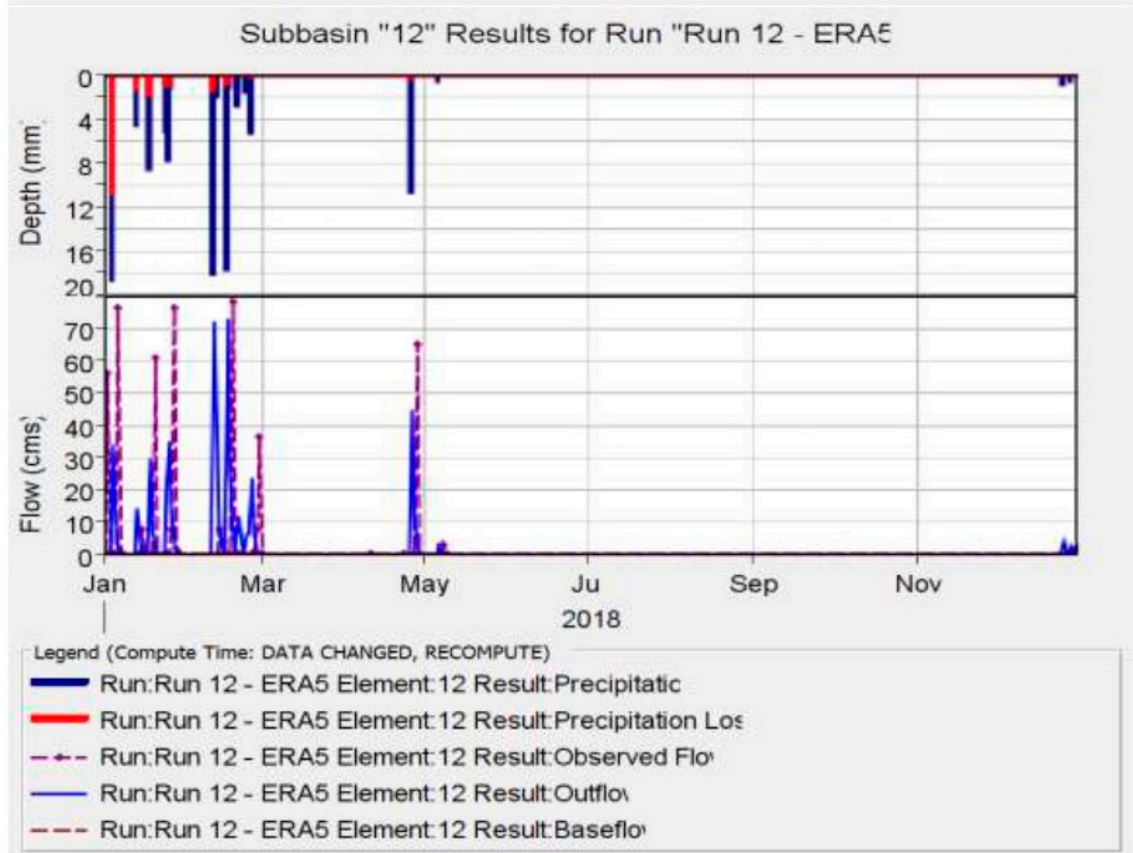

# Basin -11

Actual vs observed data

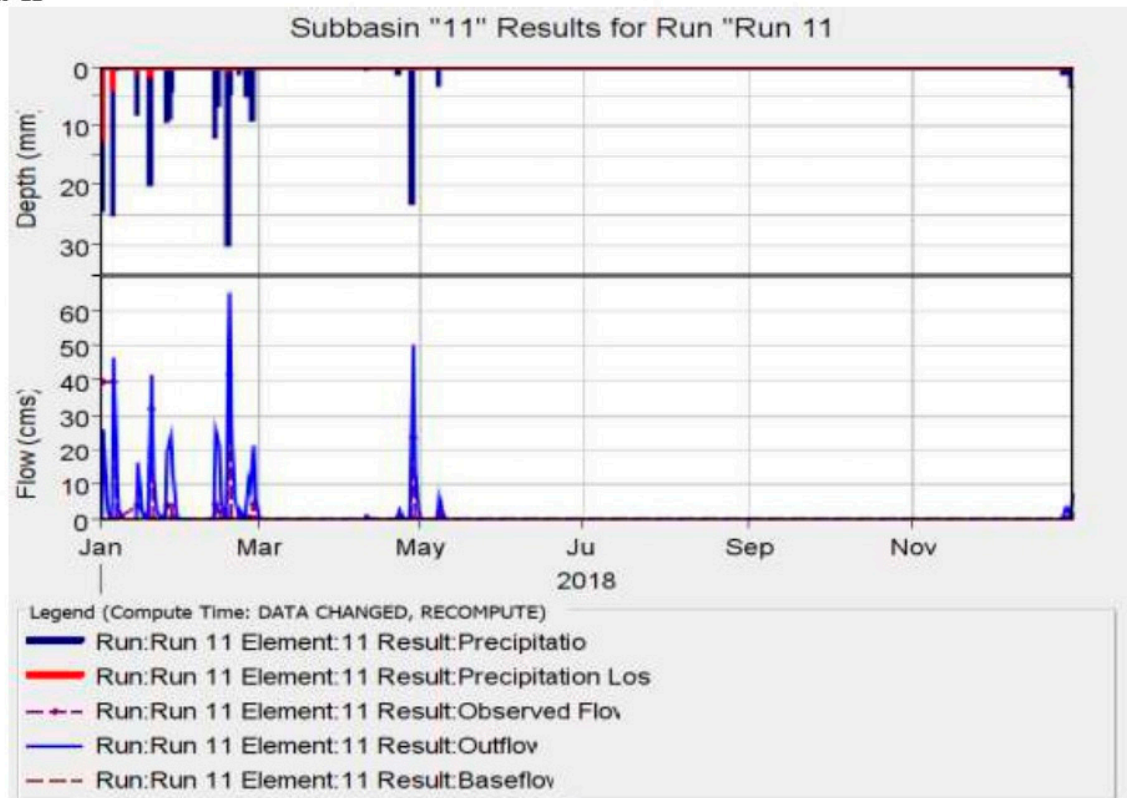

ERA5 vs observed data

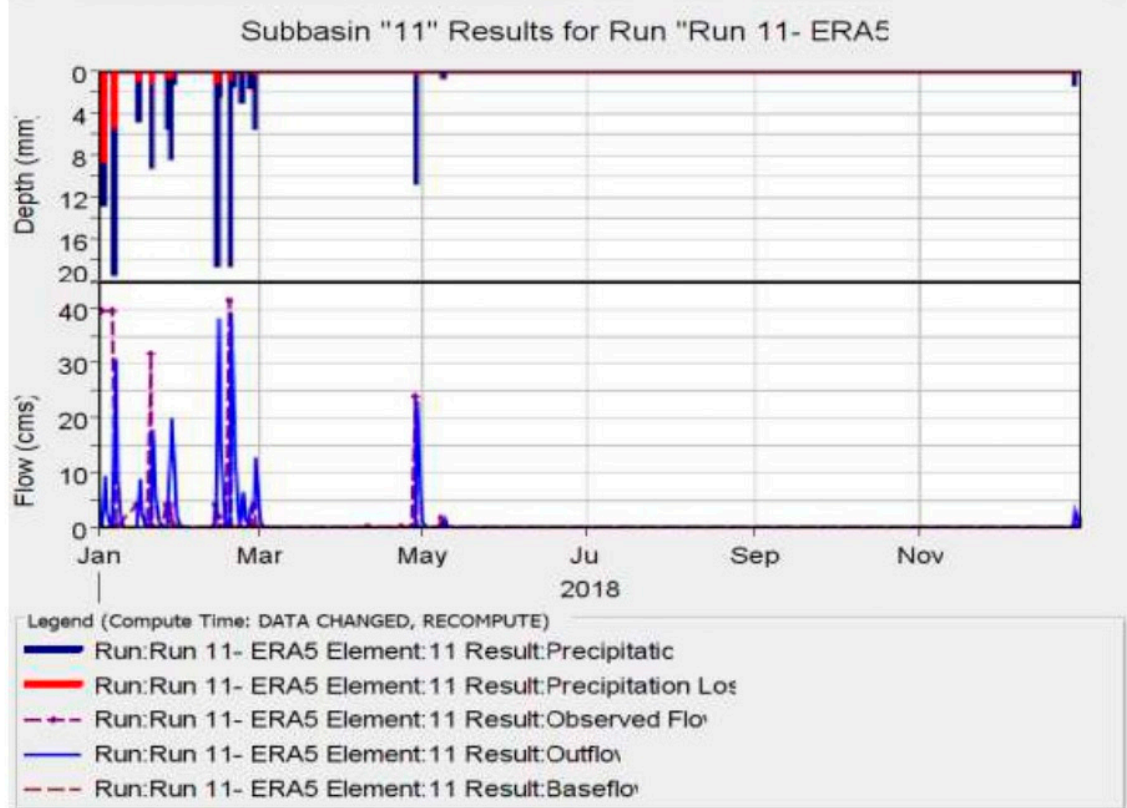



# Basin -10

Actual vs observed data

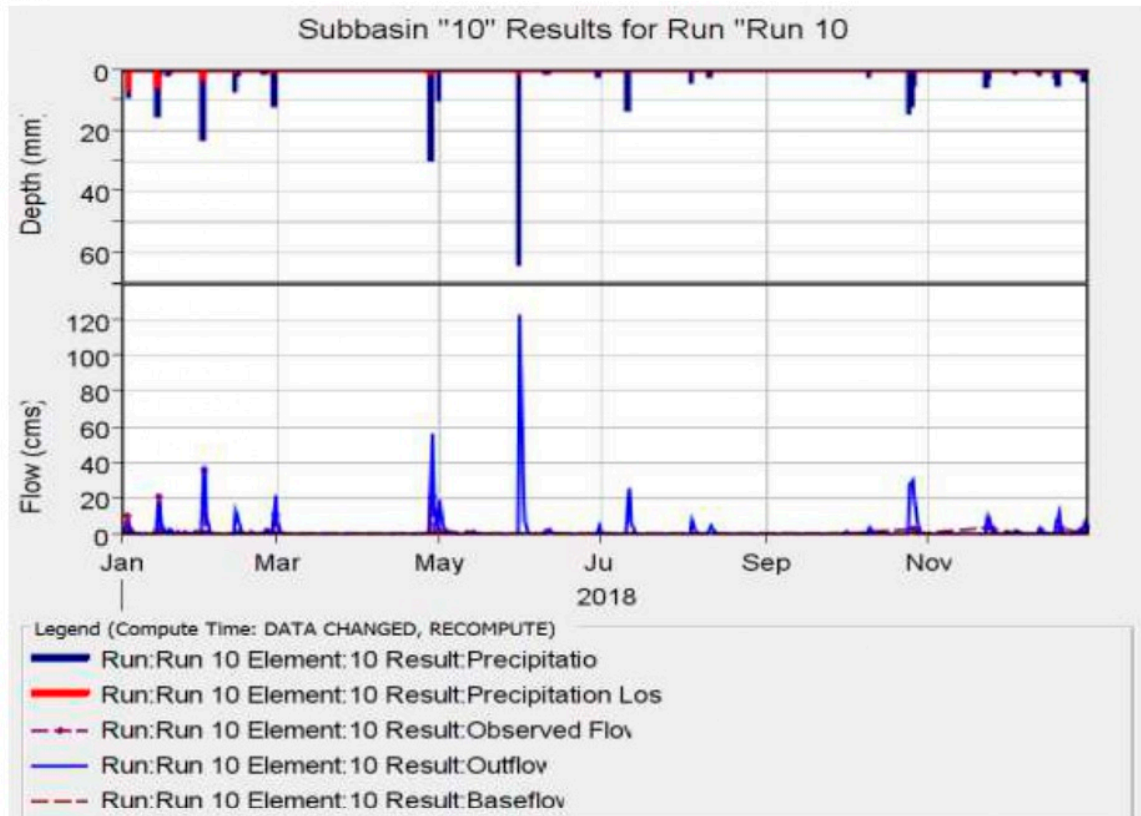

ERA5 vs observed data

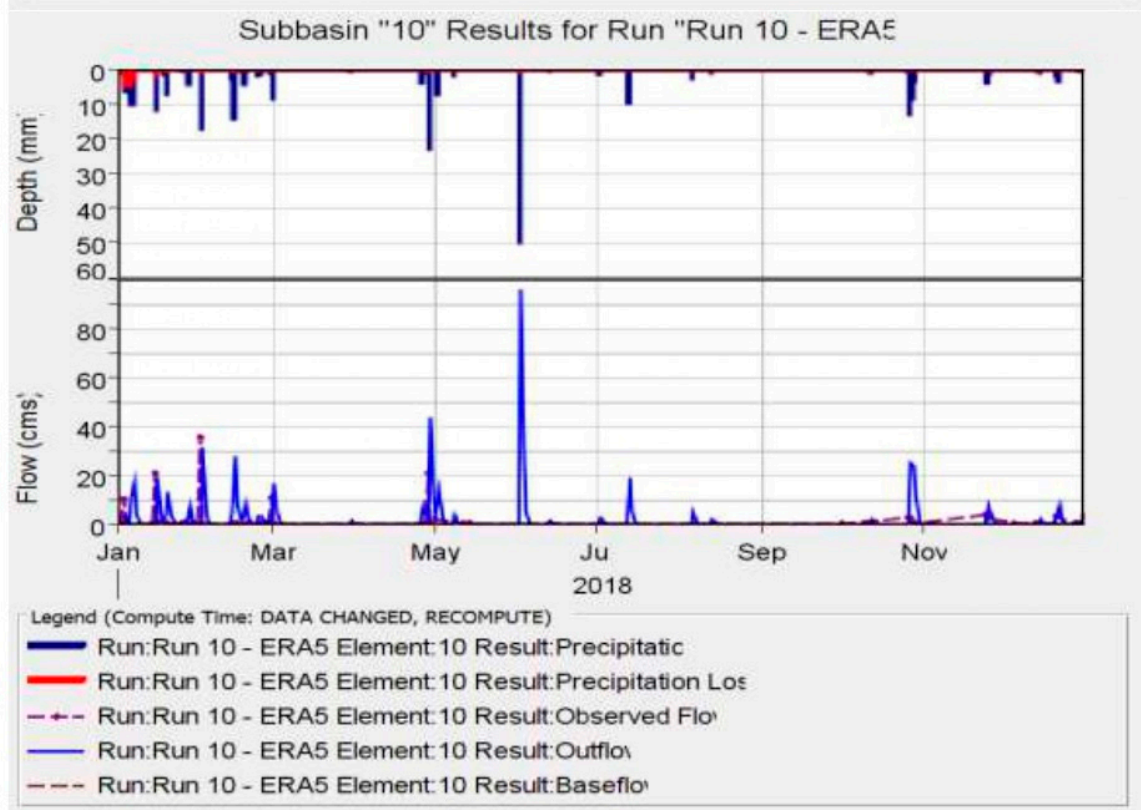

# Basin -09

Actual vs observed data

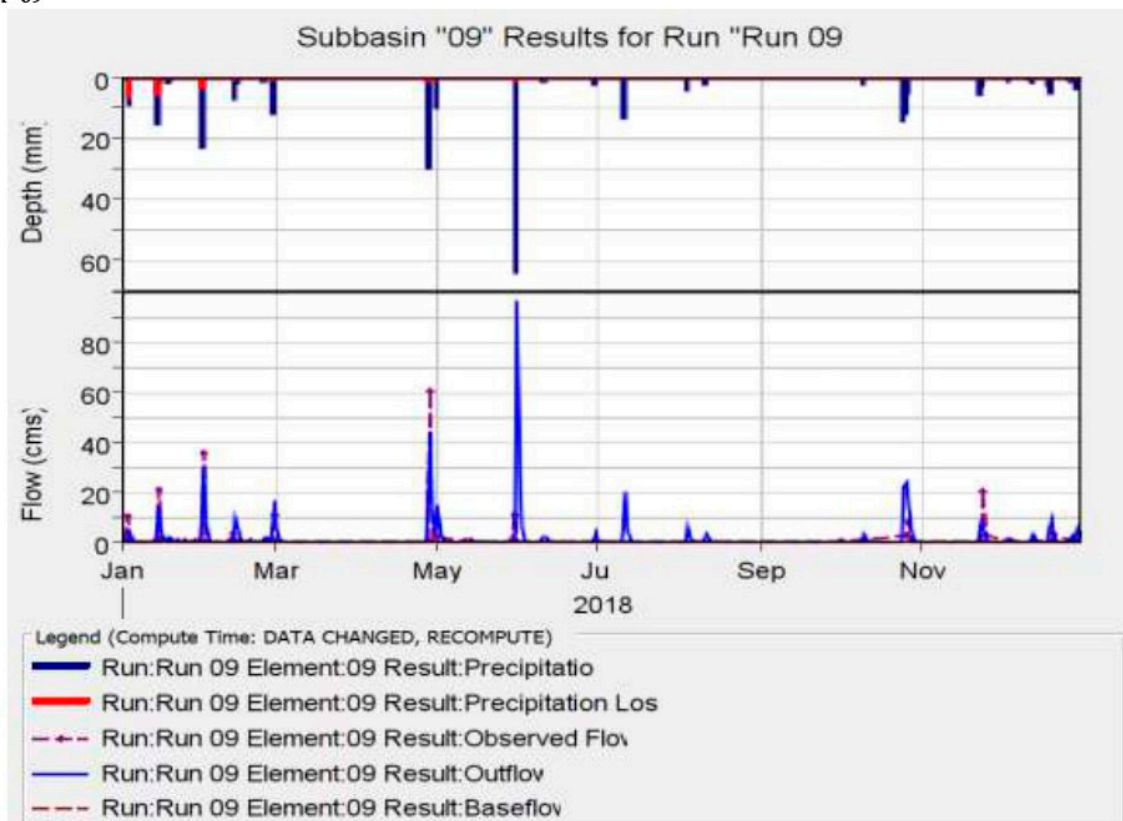

ERA5 vs observed data

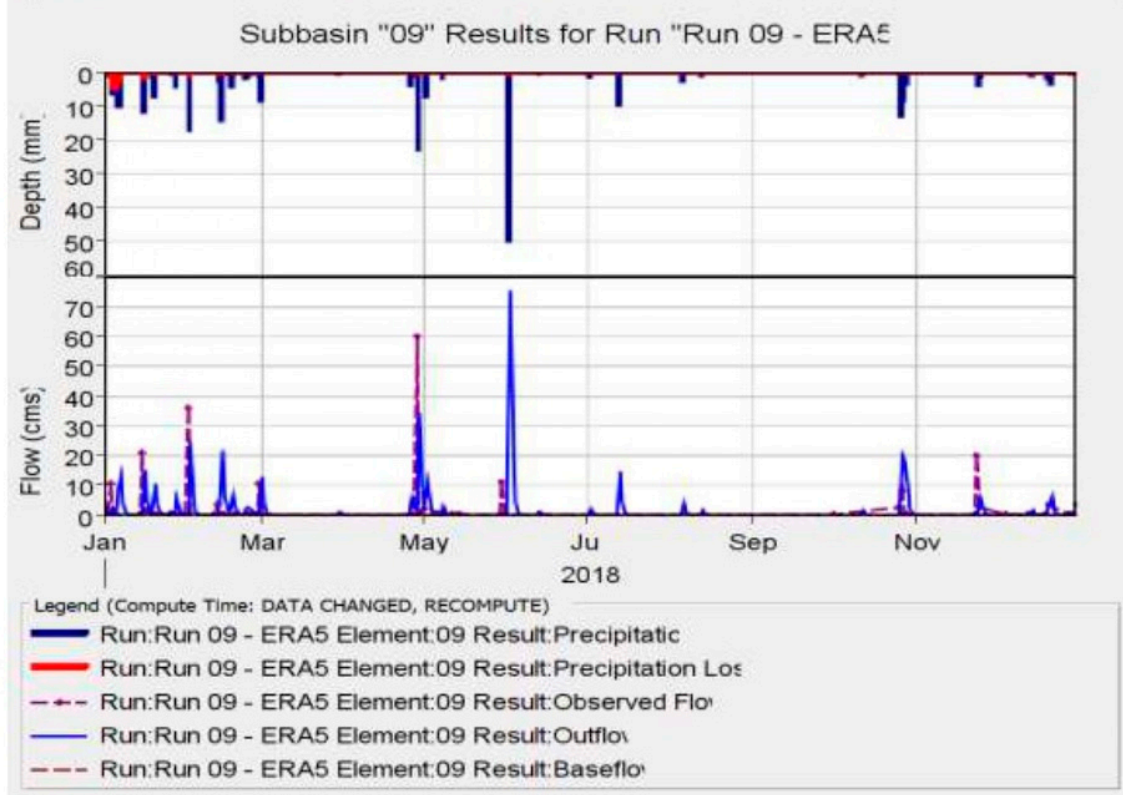

# Basin -08

Actual vs observed data

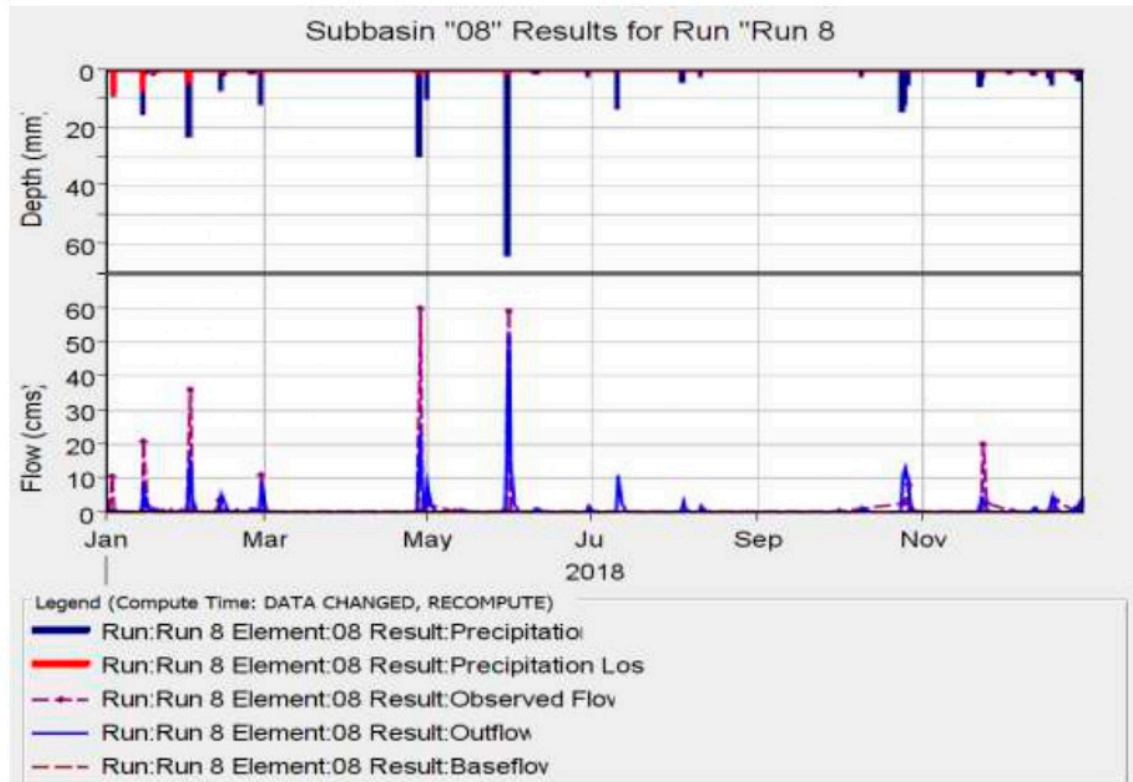

ERA5 vs observed data

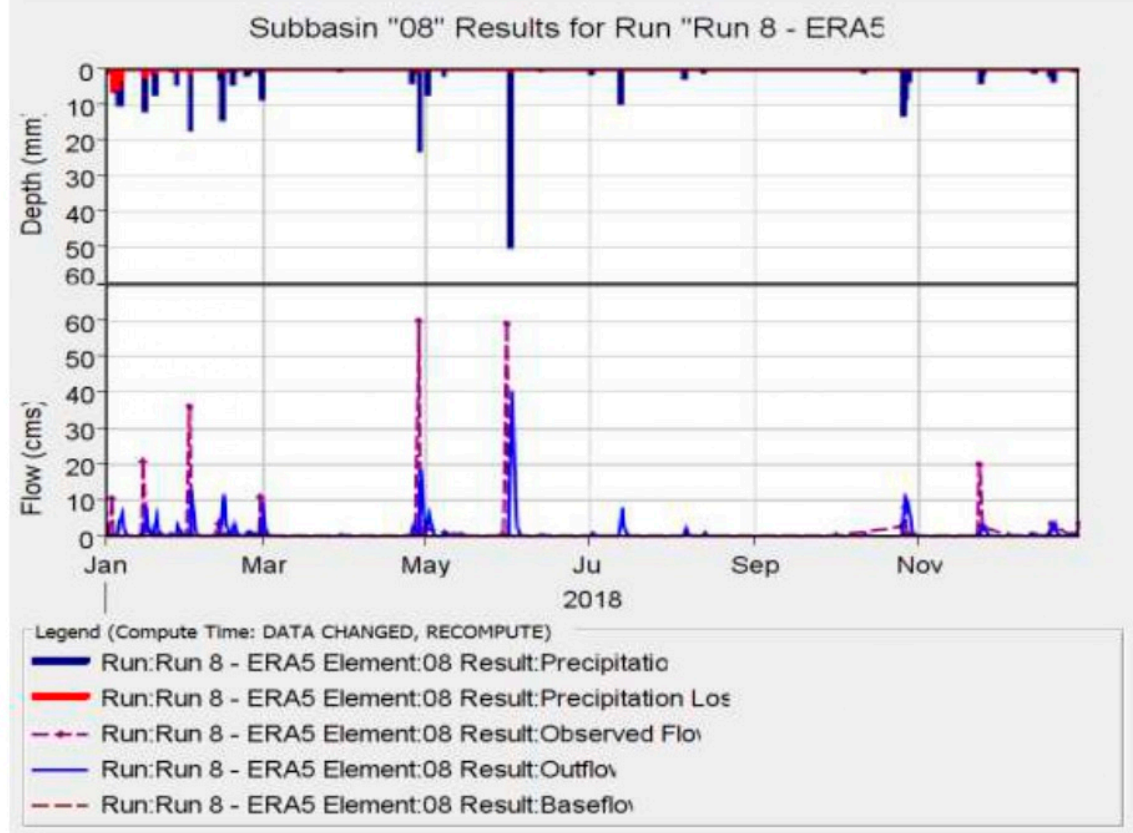

Figure S4. Simulated (actual and ERA5 data set) and observed runoff for the event year 2018.



Basin -13

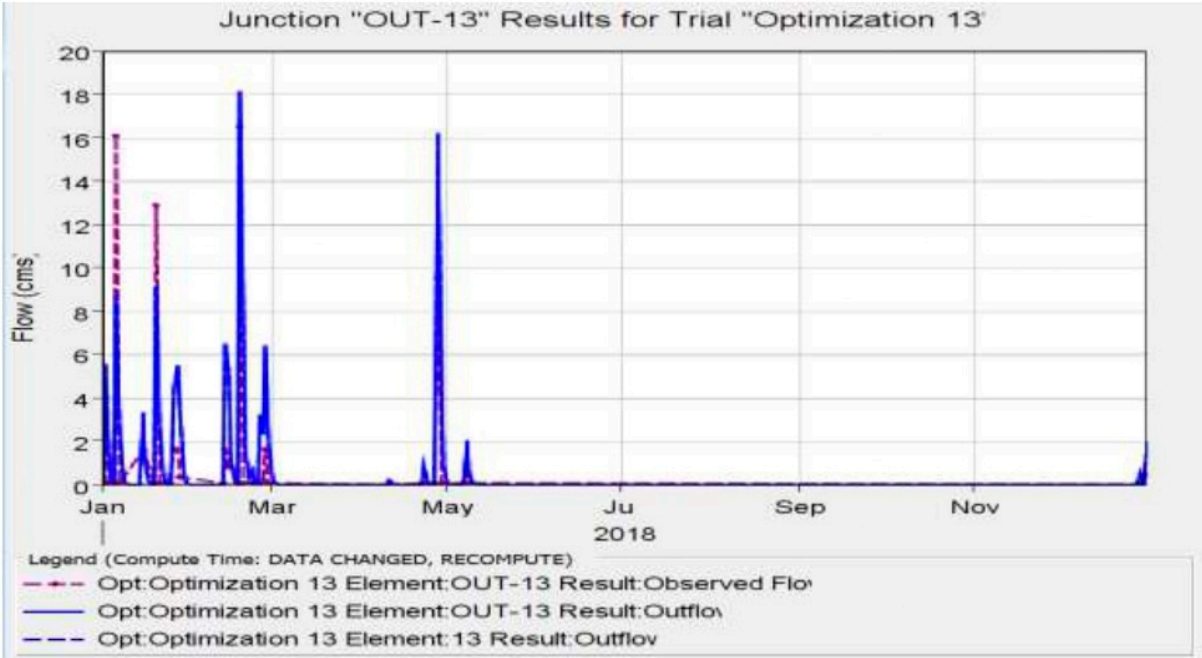

Basin -14

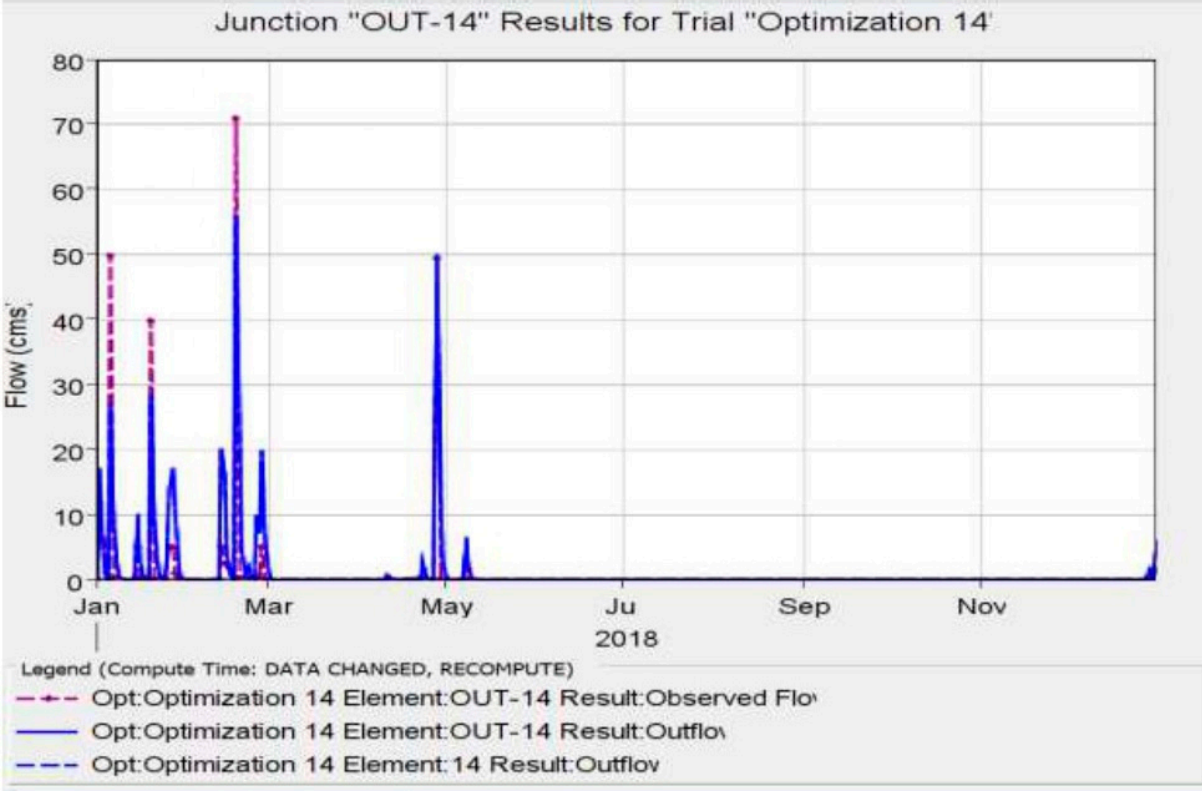

Basin -11

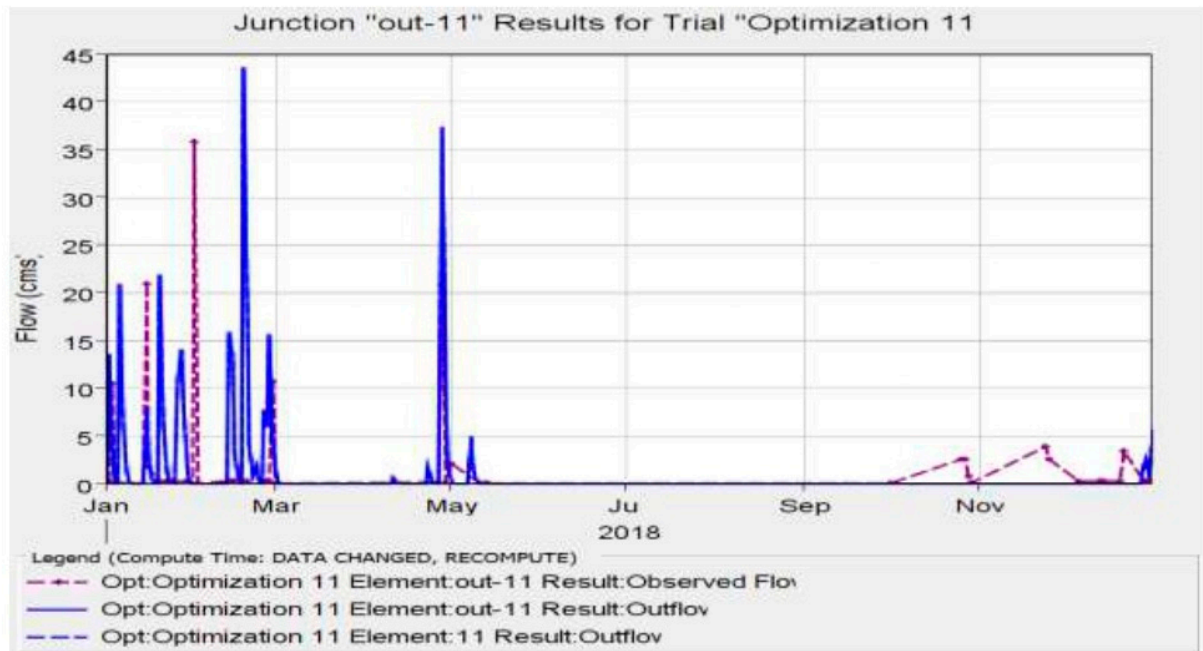

Basin -12

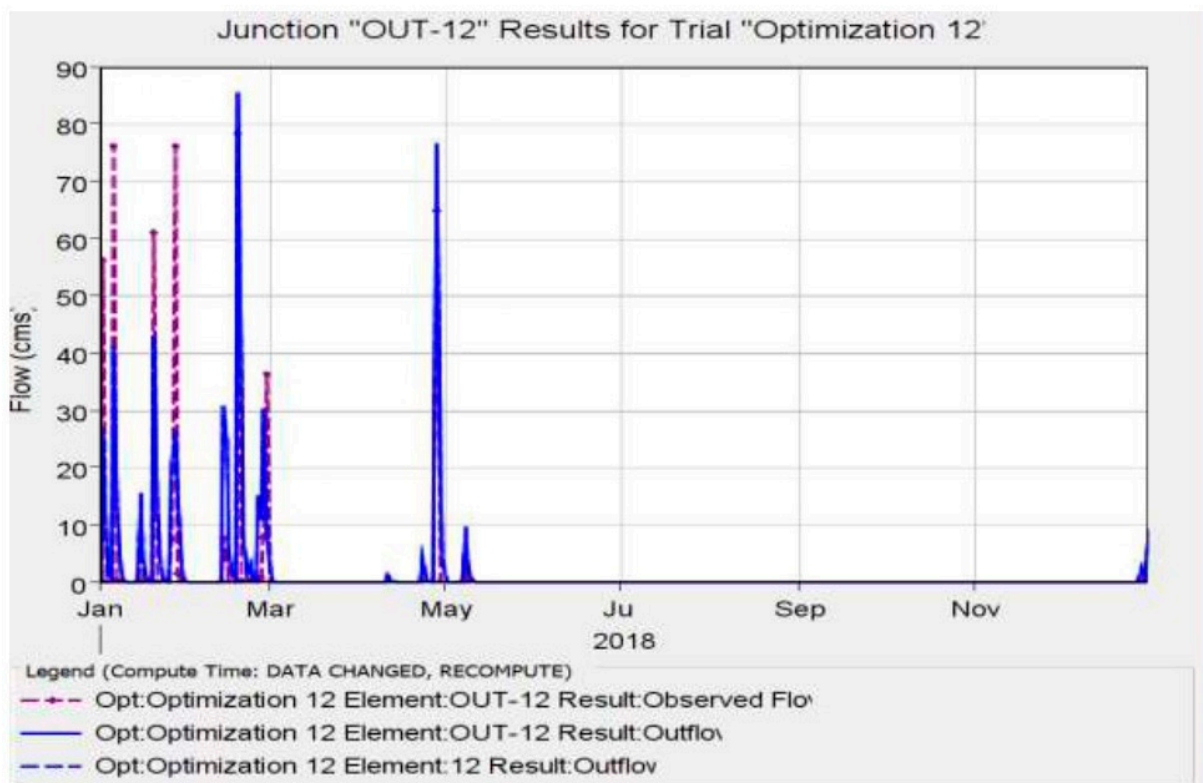

## Basin-09

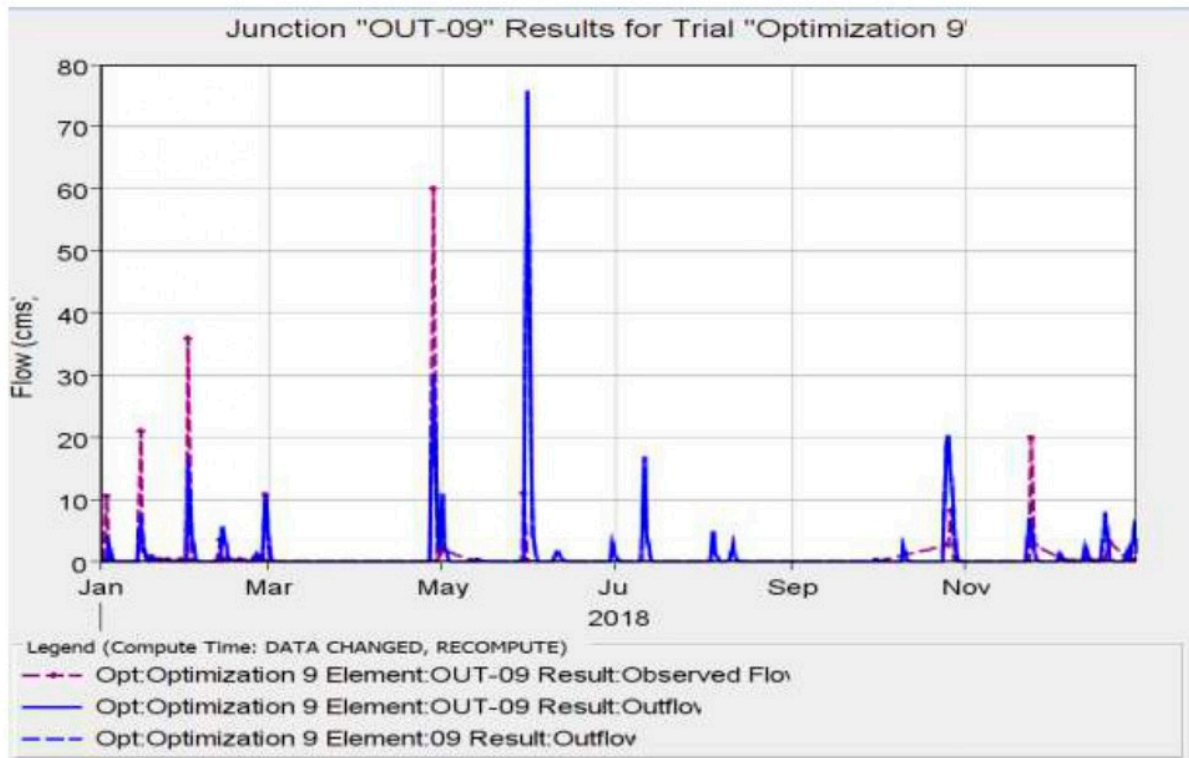

## Basin-10

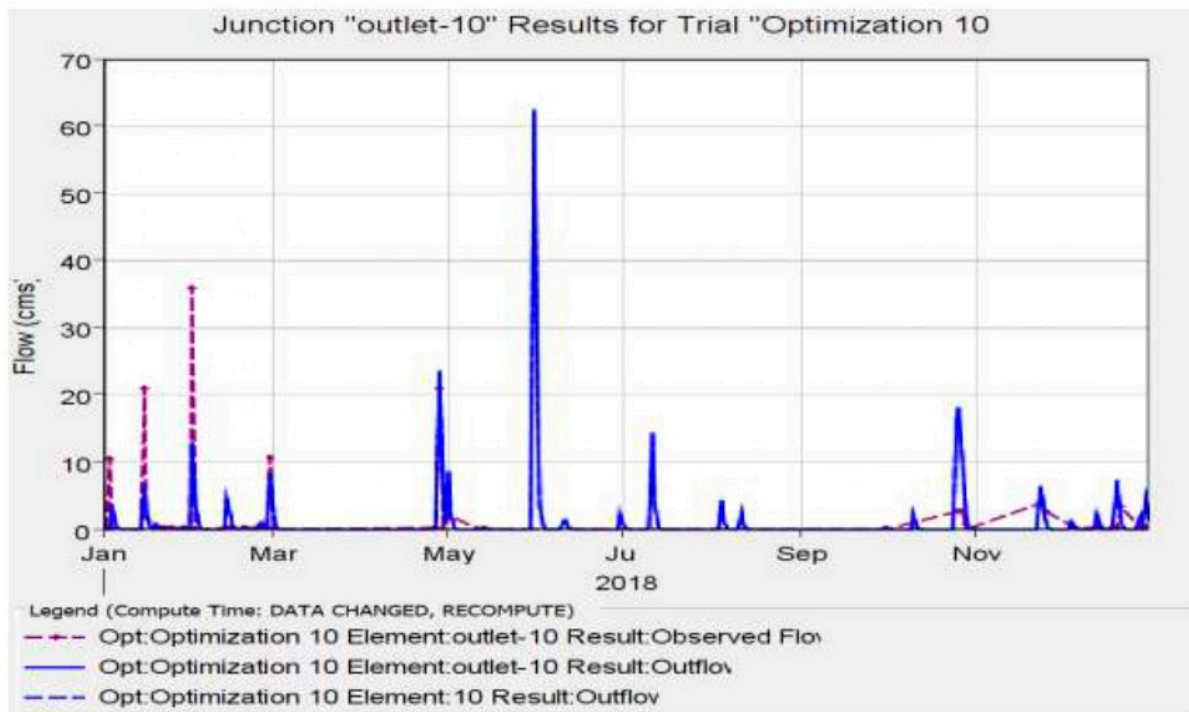

## Basin-07

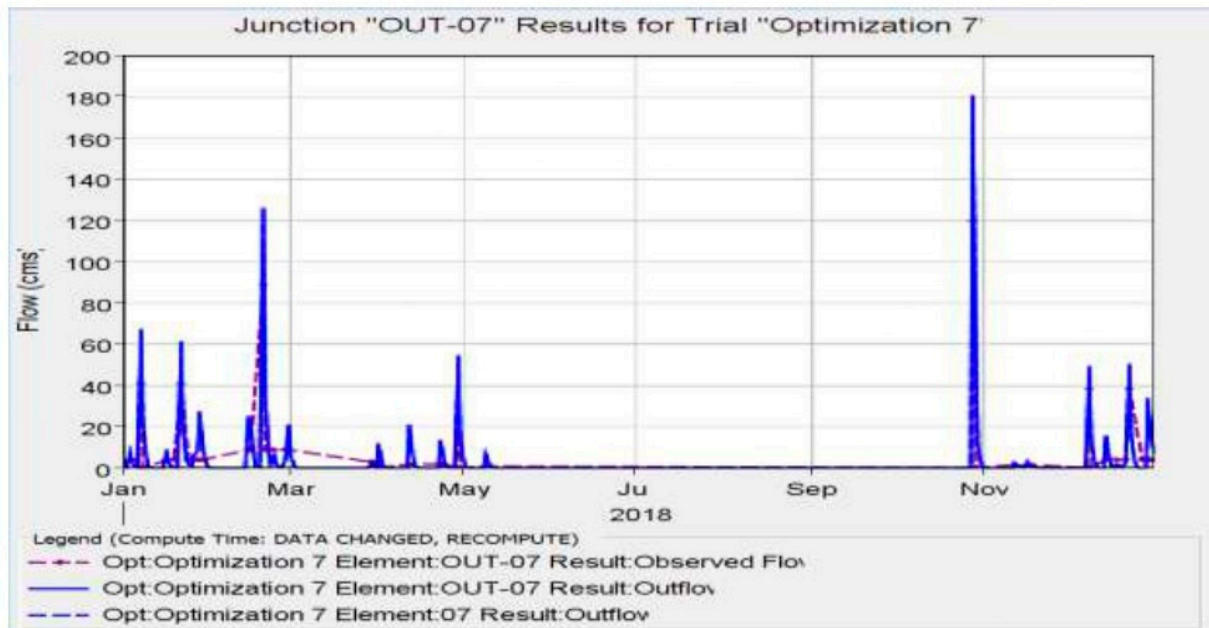

## Basin -08

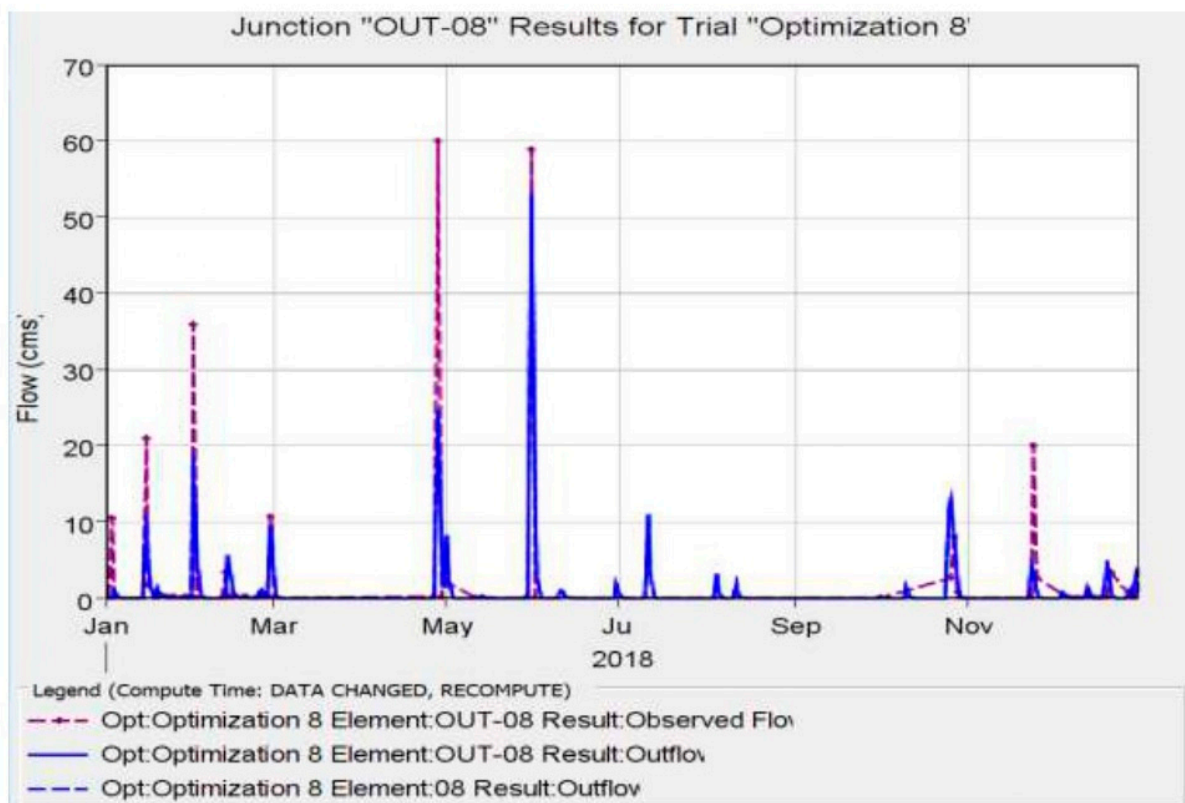



# Basin-05

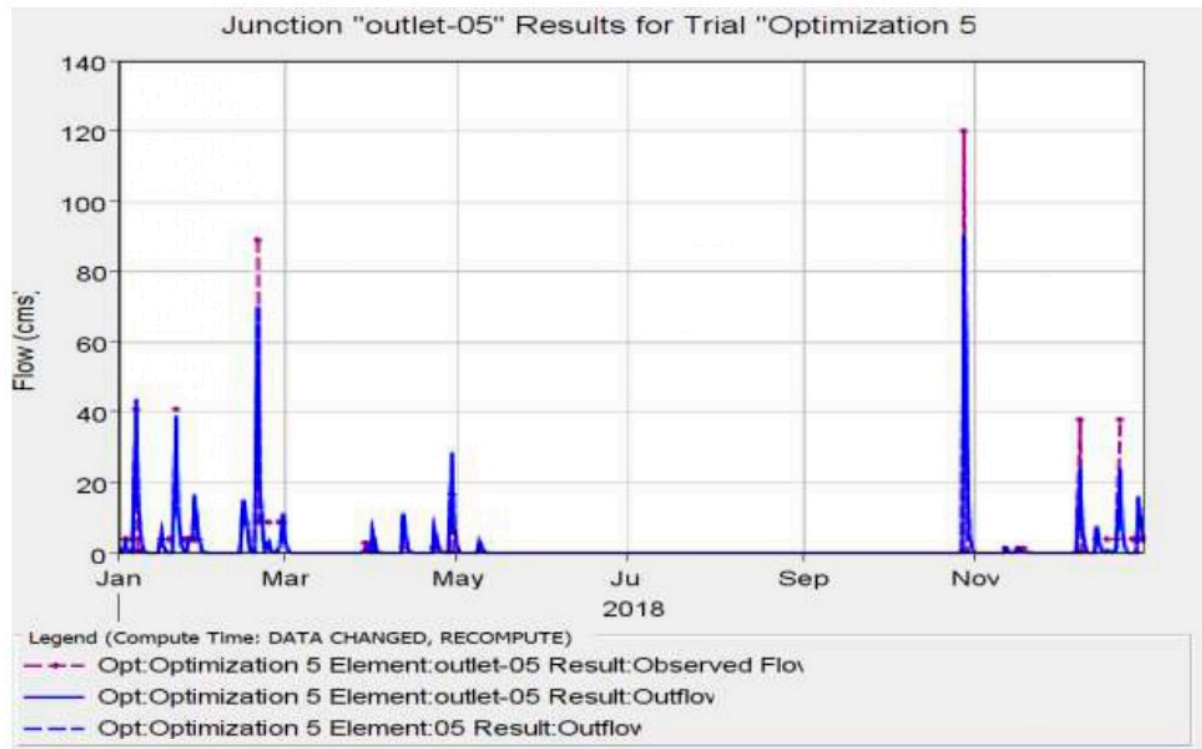

# Basin -06

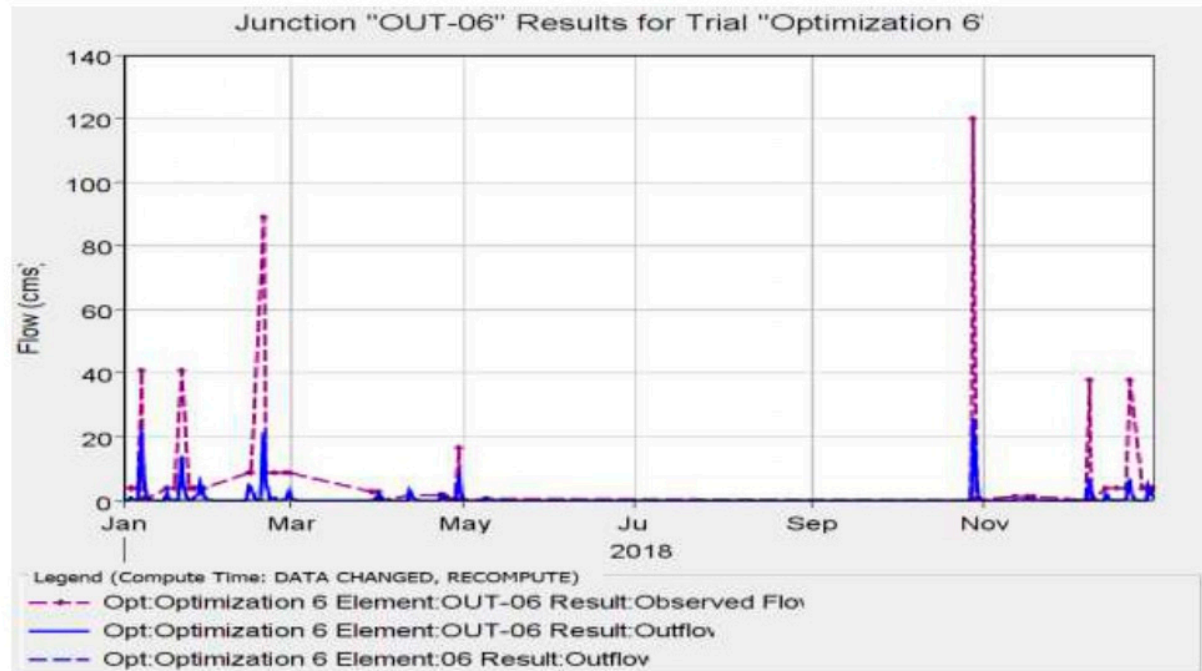

Basin -03

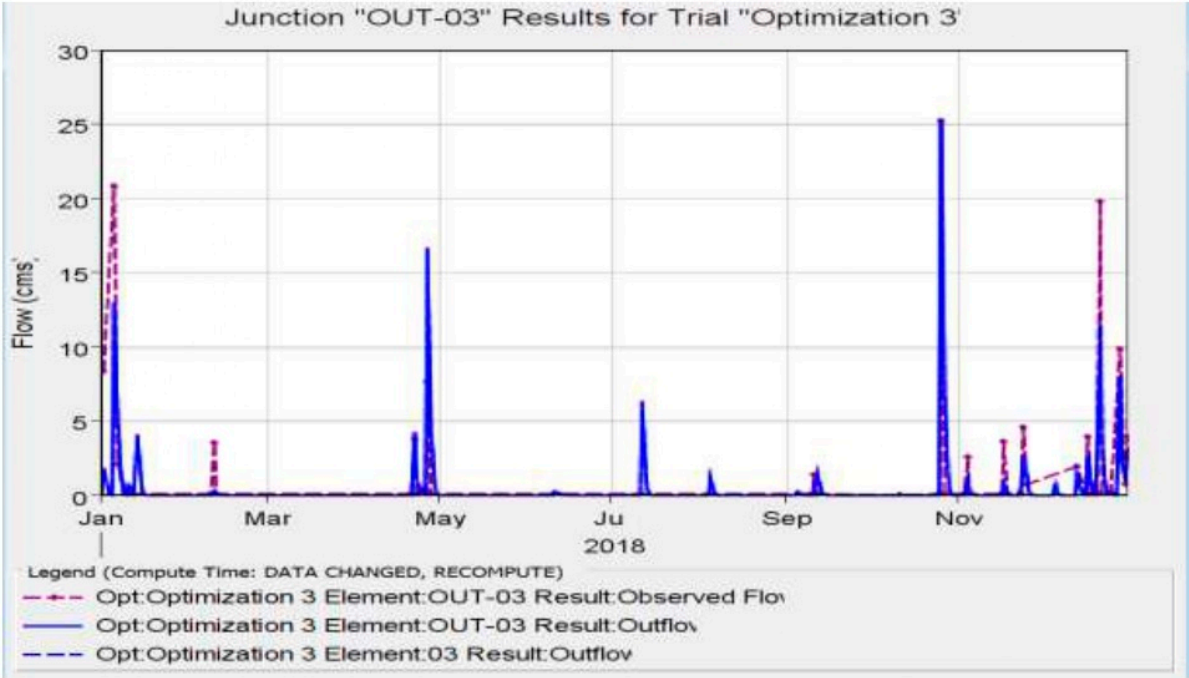

Basin -04

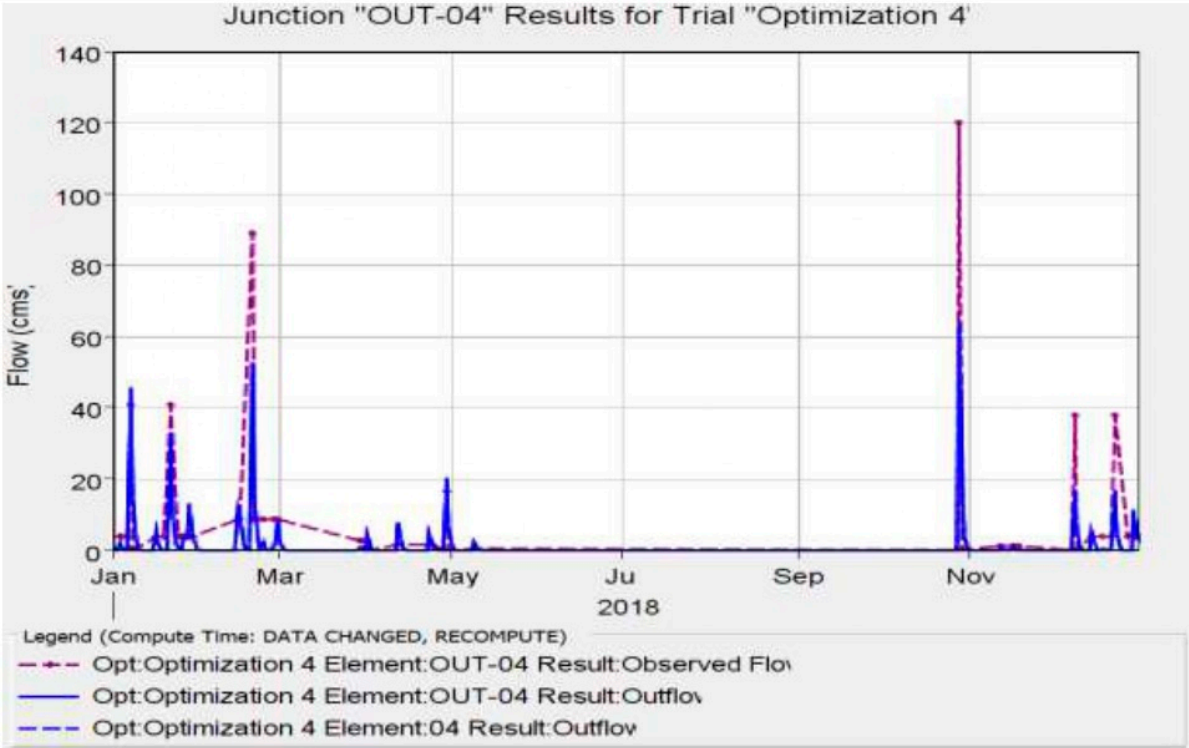



Basin -01

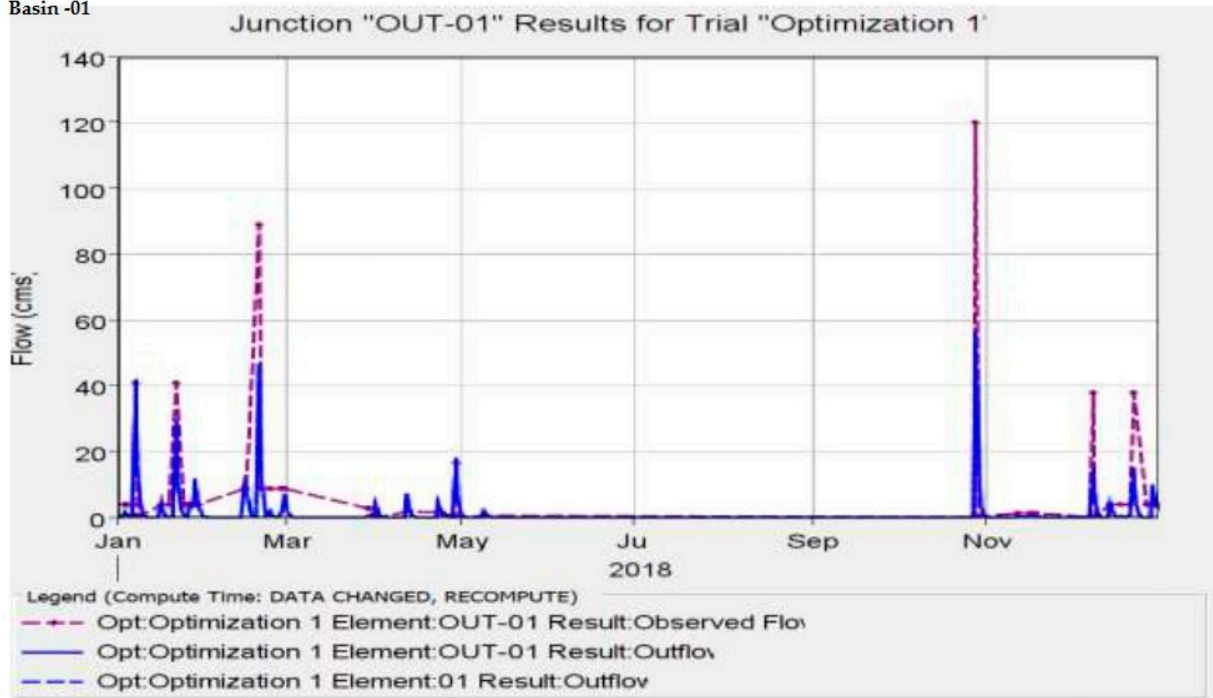

Basin -02

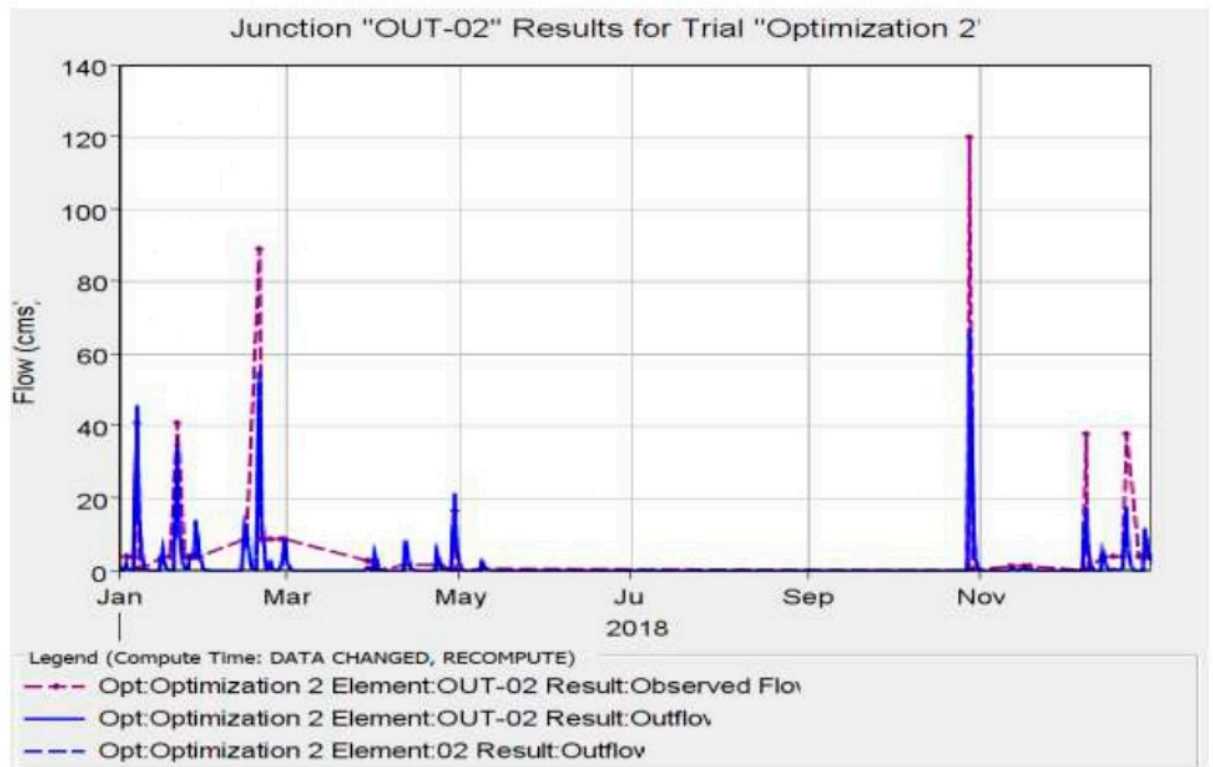

Basin -15

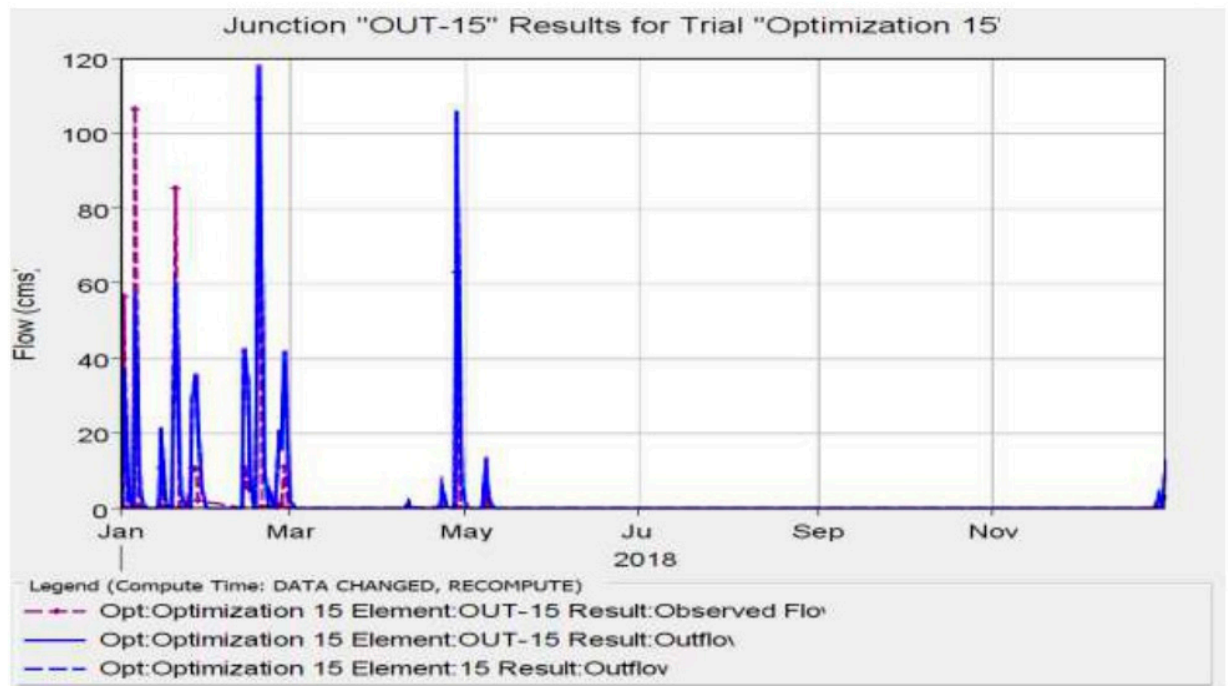

Figure S5.Calibrated and observed runoff for the event year 2018.

**Table S7.** Corresponding parameters for calibration for each basin.

| BASIN | SC - Curve Number |       | SC - Initial Abstraction(mm) |       | SCS Unit Hydrograph - Lag Time (Min) |        |
|-------|-------------------|-------|------------------------------|-------|--------------------------------------|--------|
|       | Ini.              | Opt.  | Ini.                         | Opt.  | Ini.                                 | Opt.   |
|       | value             | value | value                        | value | value                                | value  |
| 1     | 90.92             | 95.00 | 5.07                         | 10.00 | 216.84                               | 500.00 |
| 2     | 91.52             | 93.30 | 4.71                         | 9.77  | 135.37                               | 423.15 |
| 3     | 91.52             | 50.65 | 4.71                         | 5.17  | 118.78                               | 249.15 |
| 4     | 91.62             | 93.00 | 4.65                         | 10.00 | 107.60                               | 500.00 |
| 5     | 90.80             | 78.99 | 5.15                         | 5.30  | 159.69                               | 189.60 |
| 6     | 90.72             | 99.00 | 5.20                         | 0.05  | 303.30                               | 30.00  |
| 7     | 91.57             | 50.00 | 4.68                         | 9.77  | 237.89                               | 478.24 |
| 8     | 91.43             | 99.00 | 4.76                         | 1.00  | 86.52                                | 60.00  |
| 9     | 91.43             | 99.00 | 4.76                         | 10.00 | 118.23                               | 300.00 |
| 10    | 91.38             | 30.00 | 4.79                         | 3.00  | 154.25                               | 50.00  |
| 11    | 91.43             | 50.00 | 4.76                         | 1.00  | 138.42                               | 100.00 |
| 12    | 91.48             | 50.00 | 4.73                         | 1.00  | 150.91                               | 100.00 |
| 13    | 91.50             | 50.24 | 4.72                         | 5.35  | 103.65                               | 245.61 |
| 14    | 91.50             | 50.00 | 4.72                         | 1.00  | 334.67                               | 250.00 |
| 15    | 91.50             | 50.00 | 4.72                         | 1.00  | 332.70                               | 200.00 |

  

| BASIN | GA- Conductivity (mm/hr) |       | GA- Suction(mm) |        | IC- Constant Rate (mm/hr) |       | IC - Initial Loss (mm) |       |
|-------|--------------------------|-------|-----------------|--------|---------------------------|-------|------------------------|-------|
|       | Ini.                     | Opt.  | Ini.            | Opt.   | Ini.                      | Opt.  | Ini.                   | Opt.  |
|       | value                    | value | value           | value  | value                     | value | value                  | value |
| 1     | 0.96                     | 0.30  | 207.29          | 200.00 | 0.05                      | 0.00  | 3.81                   | 2.54  |
| 2     | 0.37                     | 0.30  | 218.81          | 200.00 | 0.05                      | 0.00  | 3.81                   | 2.54  |
| 3     | 0.37                     | 0.37  | 218.81          | 218.81 | 0.05                      | 0.92  | 3.81                   | 2.88  |
| 4     | 0.38                     | 0.30  | 216.76          | 200.00 | 0.04                      | 0.00  | 3.81                   | 2.54  |
| 5     | 0.69                     | 0.30  | 219.28          | 200.00 | 0.08                      | 0.19  | 3.81                   | 3.56  |
| 6     | 0.29                     | 0.30  | 235.21          | 200.00 | 0.11                      | 0.00  | 3.81                   | 2.54  |
| 7     | 0.37                     | 0.95  | 217.79          | 232.63 | 0.04                      | 1.45  | 3.81                   | 3.64  |
| 8     | 0.49                     | 0.30  | 215.89          | 200.00 | 0.04                      | 0.00  | 3.81                   | 2.96  |
| 9     | 0.49                     | 1.50  | 215.89          | 316.30 | 0.04                      | 4.00  | 3.81                   | 2.54  |
| 10    | 0.48                     | 0.69  | 216.92          | 219.77 | 0.05                      | 1.12  | 3.81                   | 3.07  |
| 11    | 0.49                     | 0.66  | 215.89          | 218.36 | 0.04                      | 4.00  | 3.81                   | 2.54  |
| 12    | 0.49                     | 0.30  | 214.87          | 200.00 | 0.04                      | 0.51  | 3.81                   | 4.38  |
| 13    | 0.49                     | 0.34  | 214.46          | 203.73 | 0.04                      | 0.62  | 3.81                   | 4.33  |
| 14    | 0.49                     | 0.30  | 214.46          | 200.00 | 0.04                      | 0.48  | 3.81                   | 4.38  |
| 15    | 0.49                     | 0.31  | 214.46          | 200.59 | 0.04                      | 0.60  | 3.81                   | 4.37  |

**Table S8.** Model performance parameters

| IN.  | BA. | SC-A | SC-E | SC-O | IC-A | IC-E | IC-O | GA-A | GA-E | GA-O |
|------|-----|------|------|------|------|------|------|------|------|------|
| R2   | 1   | 0.83 | 0.6  | 0.82 | 0.77 | 0.85 | 0.77 | 0.55 | 0.55 | 0.84 |
|      | 2   | 0.83 | 0.83 | 0.83 | 0.77 | 0.83 | 0.77 | 0.55 | 0.59 | 0.84 |
|      | 3   | 0.71 | 0.03 | 0.73 | 0.71 | 0.61 | 0.65 | 0.03 | 0.00 | 0.59 |
|      | 4   | 0.83 | 0.6  | 0.82 | 0.77 | 0.83 | 0.77 | 0.55 | 0.59 | 0.84 |
|      | 5   | 0.83 | 0.6  | 0.87 | 0.77 | 0.84 | 0.77 | 0.01 | 0.01 | 0.83 |
|      | 6   | 0.83 | 0.6  | 0.79 | 0.77 | 0.84 | 0.77 | 0.55 | 0.59 | 0.84 |
|      | 7   | 0.83 | 0.6  | 0.88 | 0.55 | 0.83 | 0.75 | 0.77 | 0.59 | 0.85 |
|      | 8   | 0.69 | 0.02 | 0.72 | 0.72 | 0.57 | 0.72 | 0.02 | 0.01 | 0.63 |
|      | 9   | 0.65 | 0.02 | 0.65 | 0.67 | 0.72 | 0.64 | 0.67 | 0.01 | 0.64 |
|      | 10  | 0.53 | 0.03 | 0.36 | 0.61 | 0.38 | 0.59 | 0.03 | 0.02 | 0.59 |
|      | 11  | 0.69 | 0.06 | 0.57 | 0.81 | 0.60 | 0.82 | 0.02 | 0.05 | 0.57 |
|      | 12  | 0.67 | 0.02 | 0.59 | 0.72 | 0.02 | 0.68 | 0.54 | 0.02 | 0.60 |
|      | 13  | 0.77 | 0.01 | 0.66 | 0.77 | 0.64 | 0.80 | 0.01 | 0.01 | 0.77 |
|      | 14  | 0.8  | 0.01 | 0.76 | 0.77 | 0.79 | 0.85 | 0.01 | 0.01 | 0.89 |
|      | 15  | 0.77 | 0.01 | 0.65 | 0.82 | 0.65 | 0.86 | 0.01 | 0.01 | 0.78 |
| RMSE | 1   | 0.60 | 0.80 | 0.60 | 0.60 | 0.90 | 0.60 | 0.80 | 1.00 | 0.70 |
|      | 2   | 0.60 | 0.50 | 0.50 | 1.10 | 1.20 | 0.50 | 1.10 | 1.20 | 0.60 |
|      | 3   | 0.90 | 1.30 | 0.50 | 1.00 | 0.70 | 0.60 | 1.40 | 1.10 | 0.70 |
|      | 4   | 0.50 | 0.70 | 0.50 | 0.50 | 0.70 | 0.50 | 0.70 | 0.90 | 0.60 |
|      | 5   | 0.40 | 0.60 | 0.40 | 0.50 | 0.60 | 0.50 | 1.10 | 1.10 | 0.50 |
|      | 6   | 0.80 | 0.90 | 0.80 | 0.90 | 0.90 | 1.10 | 1.00 | 1.00 | 0.90 |
|      | 7   | 1.70 | 1.20 | 0.80 | 1.90 | 0.90 | 0.50 | 1.40 | 0.70 | 0.40 |
|      | 8   | 0.60 | 1.10 | 0.60 | 0.60 | 0.70 | 0.60 | 1.10 | 1.10 | 0.70 |
|      | 9   | 0.40 | 1.30 | 0.60 | 1.40 | 1.30 | 0.90 | 1.30 | 1.10 | 1.00 |
|      | 10  | 1.30 | 2.00 | 0.80 | 1.30 | 0.80 | 0.80 | 1.90 | 1.20 | 0.80 |
|      | 11  | 1.00 | 1.50 | 0.70 | 0.90 | 0.70 | 1.00 | 1.30 | 1.10 | 1.00 |
|      | 12  | 0.90 | 1.10 | 0.70 | 0.23 | 1.10 | 0.60 | 0.70 | 1.10 | 0.60 |
|      | 13  | 1.20 | 1.10 | 0.70 | 1.30 | 0.60 | 0.50 | 1.10 | 1.10 | 0.50 |
|      | 14  | 0.80 | 1.10 | 0.50 | 0.90 | 0.50 | 0.40 | 1.10 | 1.10 | 0.40 |
|      | 15  | 1.10 | 1.10 | 0.70 | 1.20 | 0.60 | 0.40 | 1.10 | 1.10 | 0.50 |

Cont's. Table S8. Model performance parameters

| IN.  | BA. | SC-A  | SC-E  | SC-O  | IC-A   | IC-E   | IC-O   | GA-A   | GA-E   | GA-O   |
|------|-----|-------|-------|-------|--------|--------|--------|--------|--------|--------|
| NSE  | 1   | 0.67  | 0.40  | 0.68  | 0.66   | 0.23   | 0.67   | 0.40   | -0.05  | 0.52   |
|      | 2   | 0.67  | 0.75  | 0.75  | -0.32  | -0.47  | 0.73   | -0.23  | -0.36  | 0.61   |
|      | 3   | 0.23  | -0.80 | 0.73  | 0.05   | 0.57   | 0.61   | -0.87  | -0.32  | 0.56   |
|      | 4   | 0.73  | 0.45  | 0.73  | 0.71   | 0.55   | 0.72   | 0.45   | 0.21   | 0.59   |
|      | 5   | 0.82  | 0.58  | 0.85  | 0.76   | 0.60   | 0.77   | -0.25  | -0.22  | 0.78   |
|      | 6   | 0.28  | 0.11  | 0.29  | 0.27   | 0.17   | -0.10  | 0.10   | -0.01  | 0.16   |
|      | 7   | -1.97 | -0.53 | 0.37  | -2.53  | 0.16   | 0.75   | -0.89  | 0.55   | 0.85   |
|      | 8   | 0.65  | -0.23 | 0.69  | 0.68   | 0.44   | 0.69   | -0.23  | -0.15  | 0.53   |
|      | 9   | 0.82  | -0.72 | 0.64  | -1.10  | -0.72  | 0.11   | -0.72  | -0.19  | -0.05  |
|      | 10  | -0.74 | -2.84 | 0.34  | -0.65  | 0.37   | 0.40   | -2.70  | -0.40  | 0.39   |
|      | 11  | 0.00  | -1.26 | 0.51  | 0.10   | 0.57   | -0.04  | -0.57  | -0.24  | -0.04  |
|      | 12  | 0.23  | -0.30 | 0.58  | 0.21   | 0.40   | 0.68   | 0.50   | -0.21  | 0.60   |
|      | 13  | -0.42 | -0.27 | 0.50  | -0.60  | 0.64   | 0.79   | -0.25  | -0.18  | 0.75   |
|      | 14  | 0.29  | -0.20 | 0.70  | 0.17   | 0.70   | 0.83   | -0.19  | -0.15  | 0.88   |
|      | 15  | -0.26 | -0.26 | 0.54  | -0.34  | 0.64   | 0.84   | -0.24  | -0.17  | 0.75   |
| BIAS | 1   | -0.29 | -0.44 | -0.28 | -31.05 | -78.16 | -24.98 | -45.09 | -87.47 | -59.95 |
|      | 2   | 0.05  | -0.16 | -0.16 | -95.50 | -98.91 | -11.54 | -91.47 | -95.83 | -52.36 |
|      | 3   | 0.58  | -0.03 | -0.03 | 54.40  | -23.97 | -37.79 | -10.47 | -64.11 | -34.72 |
|      | 4   | -0.19 | -0.36 | -0.19 | -20.84 | -58.85 | -15.49 | -36.67 | -73.17 | -54.26 |
|      | 5   | 0.19  | -0.05 | 0.05  | 11.11  | -55.10 | -5.47  | -86.72 | -96.22 | -31.64 |
|      | 6   | -0.68 | -0.75 | -0.66 | -71.70 | -82.05 | -92.99 | -78.13 | -88.12 | -82.10 |
|      | 7   | 2.00  | 1.38  | 0.93  | 195.24 | 54.18  | -10.62 | 136.18 | 0.60   | -8.00  |
|      | 8   | -0.18 | -0.55 | -0.12 | -17.42 | -61.48 | -12.37 | -57.69 | -88.07 | -54.01 |
|      | 9   | 0.19  | 0.05  | 0.29  | 75.30  | -22.76 | -60.78 | -3.41  | -72.76 | -53.06 |
|      | 10  | 1.55  | 1.10  | 0.17  | 143.44 | -22.92 | -41.85 | 88.73  | -45.13 | -42.04 |
|      | 11  | 1.45  | 0.13  | 0.52  | 144.98 | -19.72 | -45.19 | -59.07 | -73.99 | -45.19 |
|      | 12  | 1.06  | -0.54 | 0.26  | 108.23 | -5.98  | 1.03   | -31.71 | -89.13 | -7.46  |
|      | 13  | 1.88  | -0.47 | 0.77  | 192.89 | -3.57  | 27.14  | -48.81 | -87.53 | 25.12  |
|      | 14  | 1.48  | -0.54 | 0.52  | 148.61 | -17.95 | 26.00  | -54.86 | -89.01 | 13.41  |
|      | 15  | 1.79  | -0.47 | 0.69  | 183.52 | -7.07  | 24.53  | -49.15 | -87.41 | 27.47  |

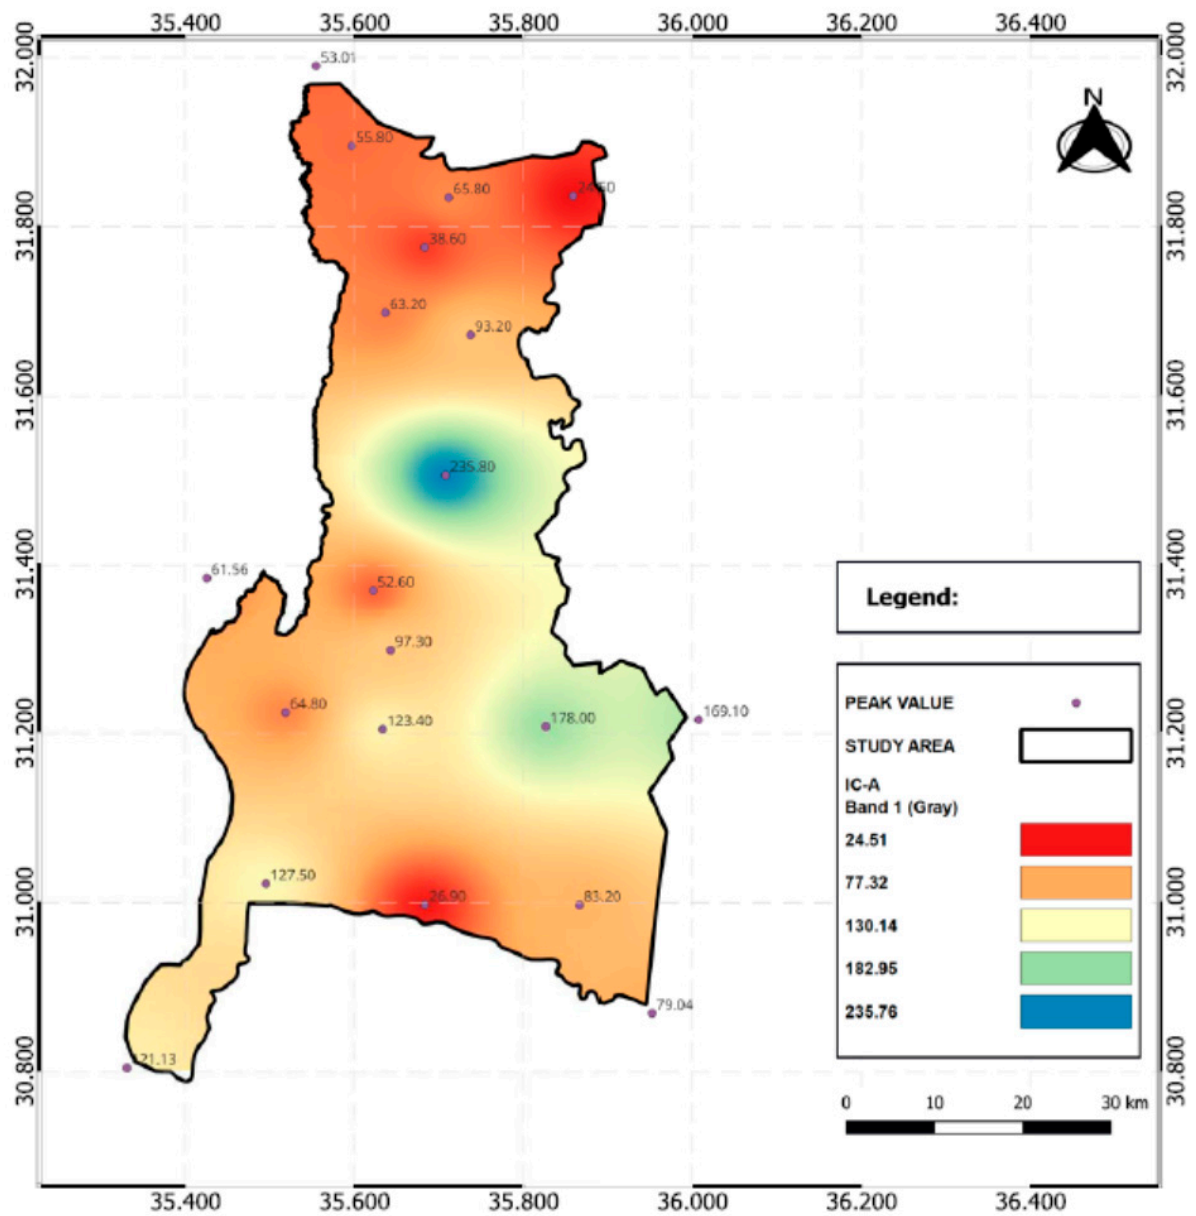

a. IC-A



SC

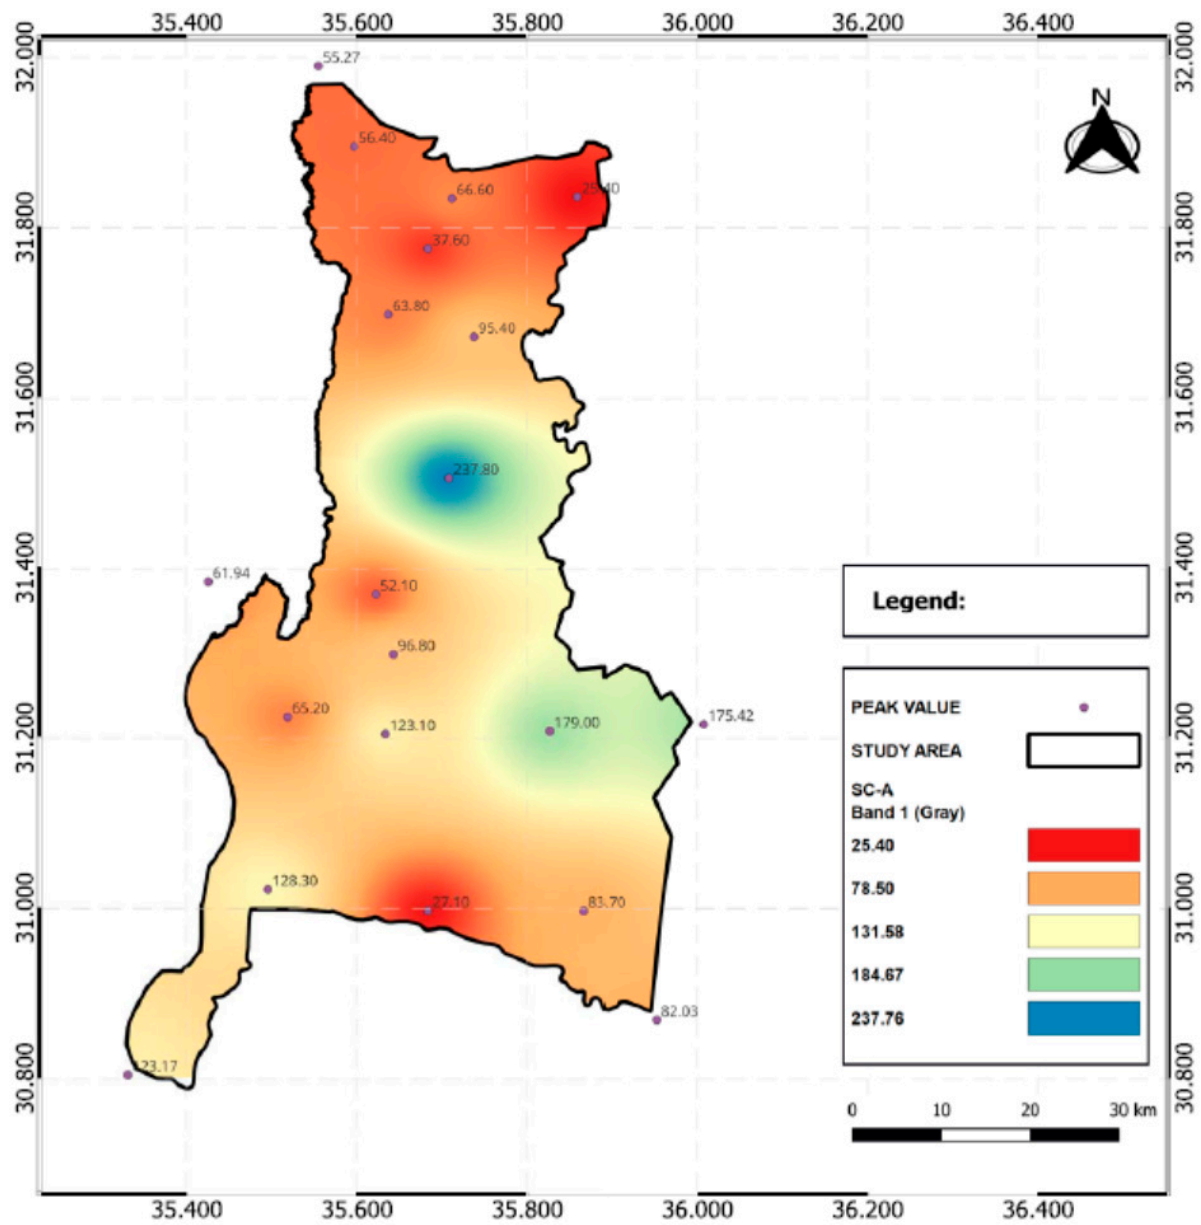

b. SC-A

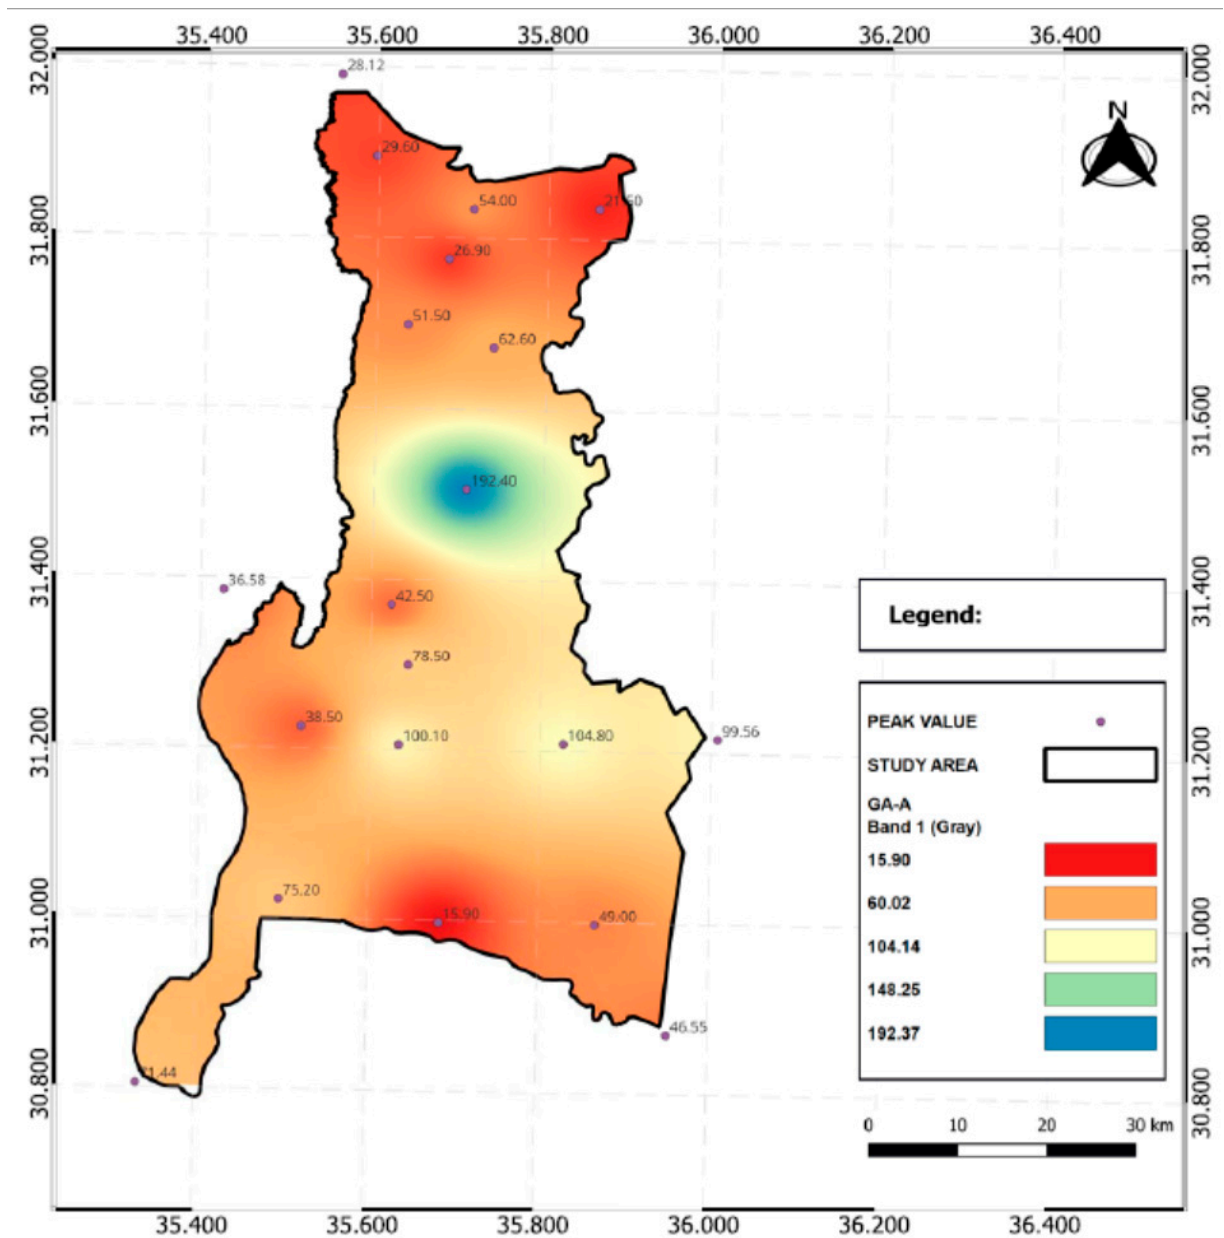

c. GA-A

**Figure S18.** Simulated peak discharge using actual percieptation

ICIC

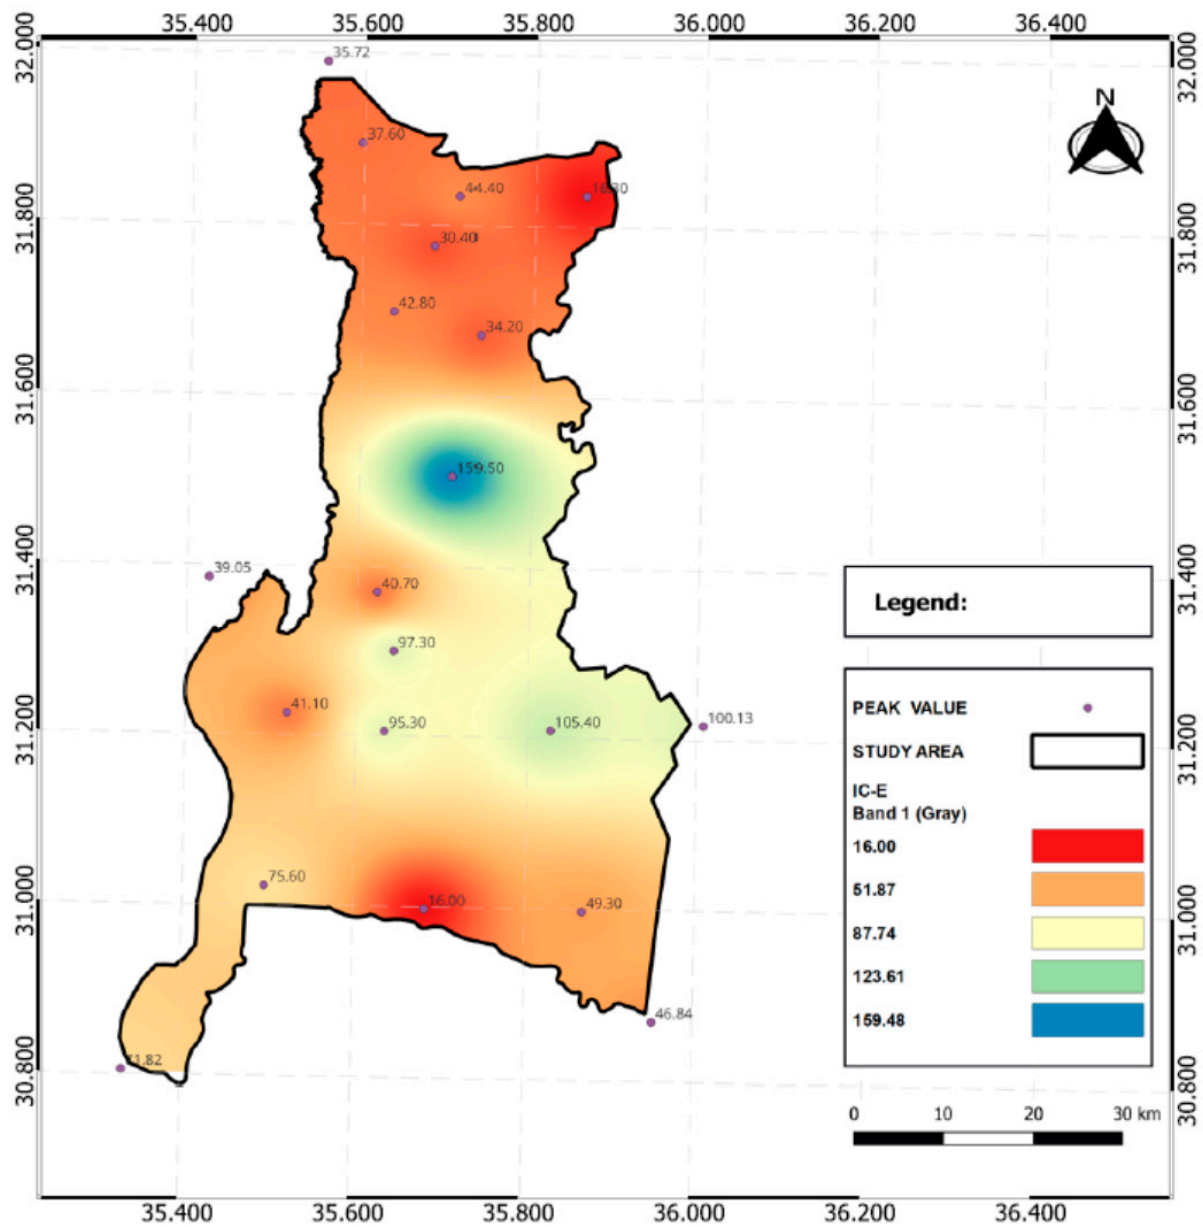

a. IC-E

SC

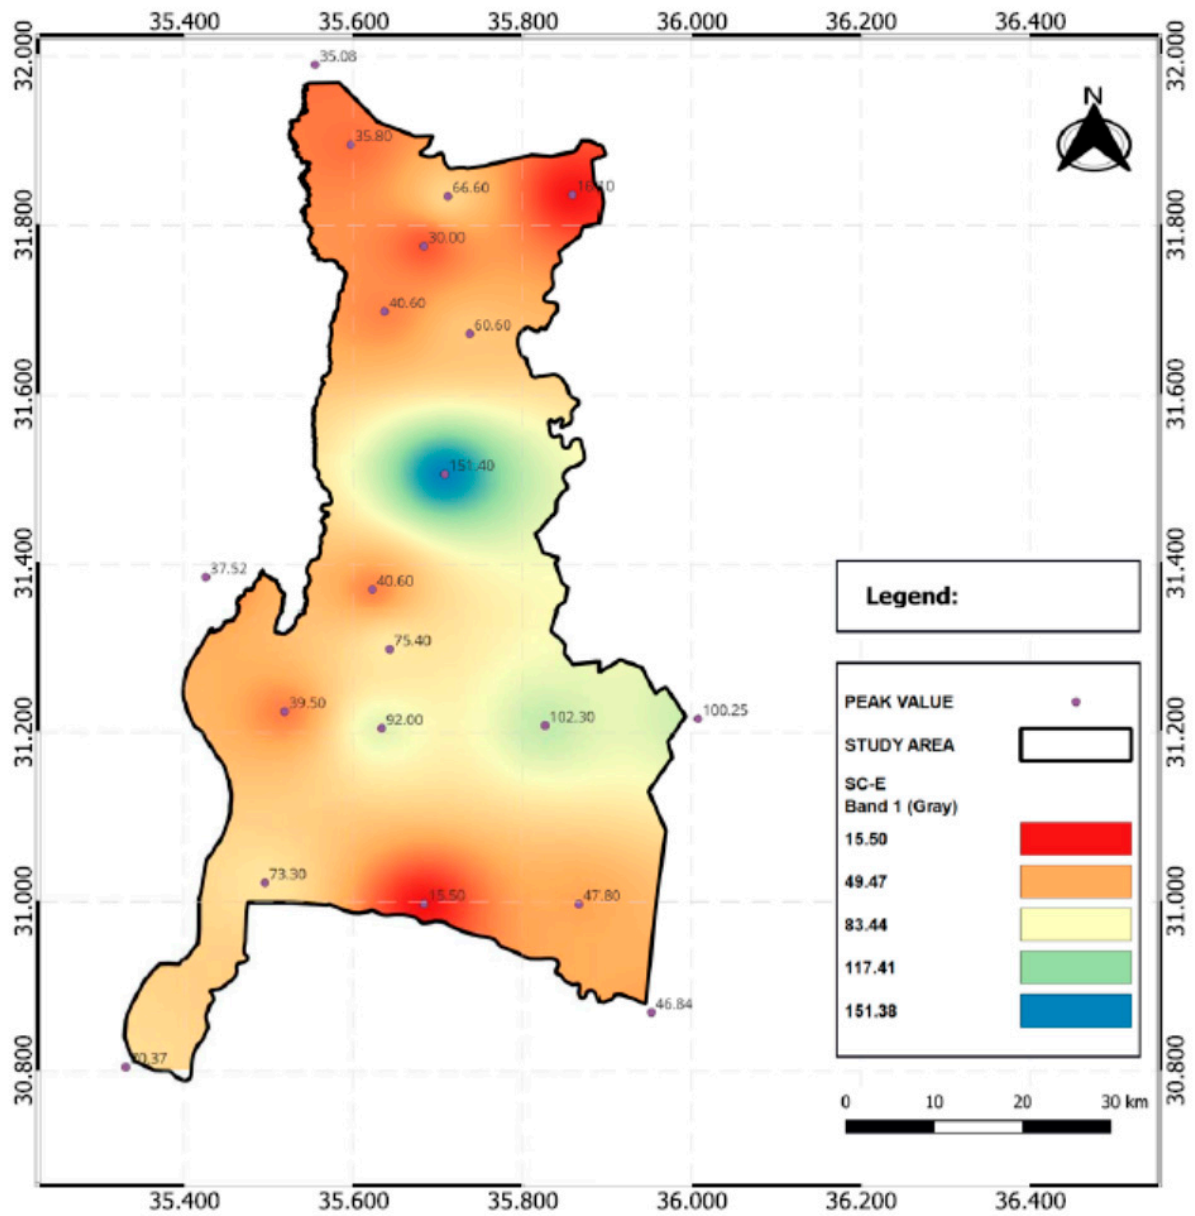

b. SC-E

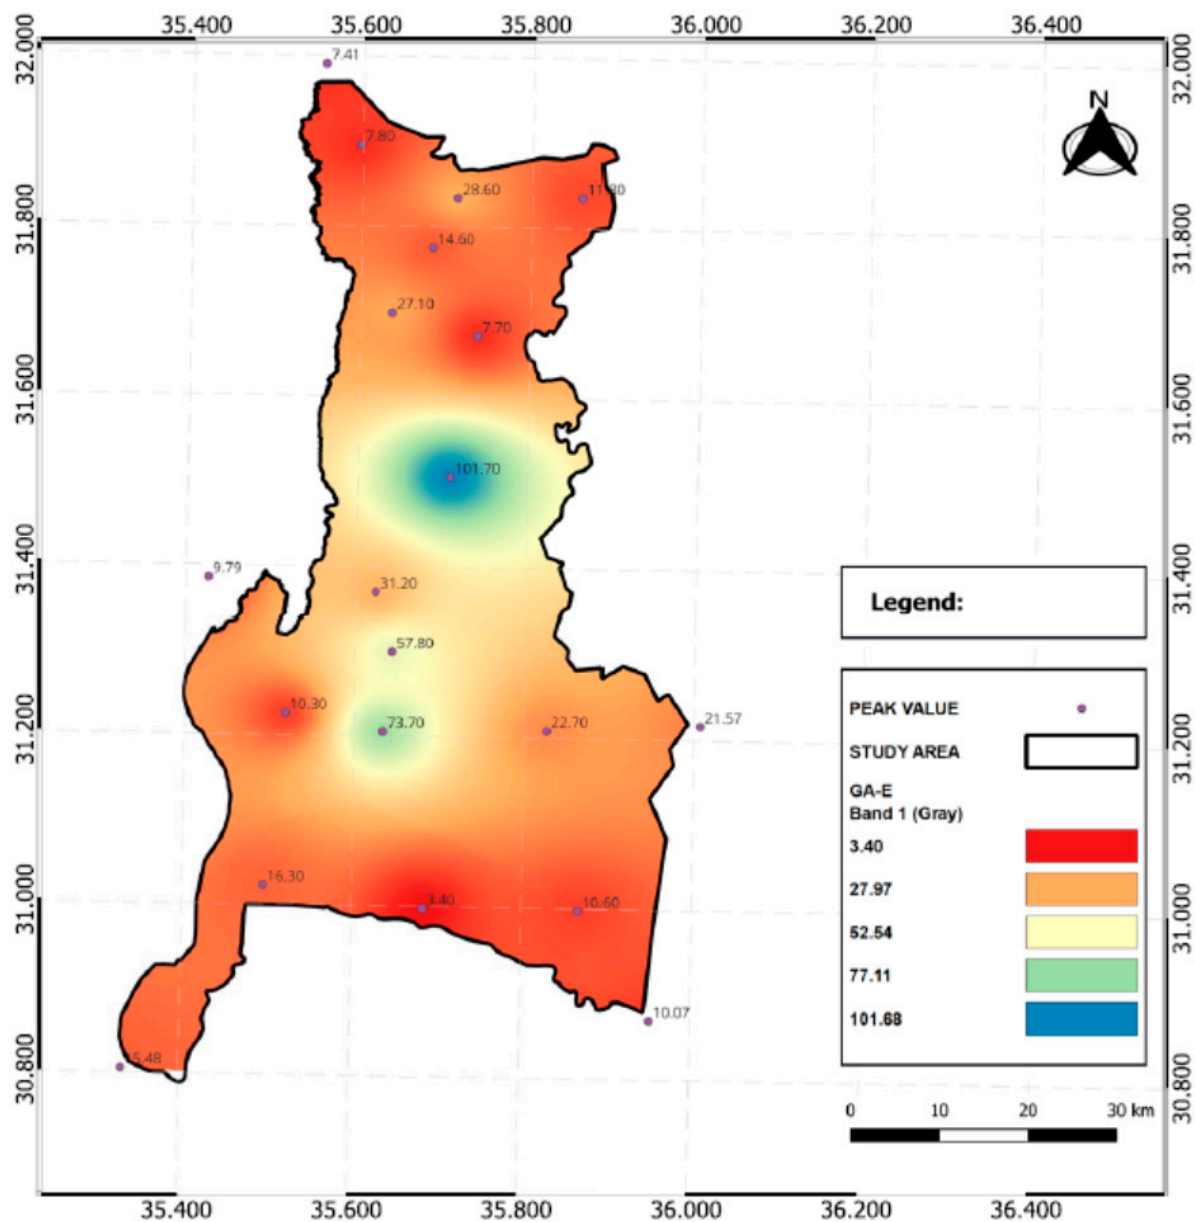

c. GA-E

Figure S19. SCN- Peak discharge using ERA dataset
